# Supplementary material for: Temporal Analysis Reveals the Transient Differential Expression of Transcription Factors That Underlie the Trans-Differentiation of Human Monocytes to Macrophages
Source: Int J Mol Sci. 2022 Dec 13;23(24):15830. doi: 10.3390/ijms232415830 (PMC9781183; doi:10.3390/ijms232415830)
Supplement: Supplementary file 1 [file ijms-23-15830-s001.zip › ijms-1968353-supplementary.pdf]

## Supplementary materials

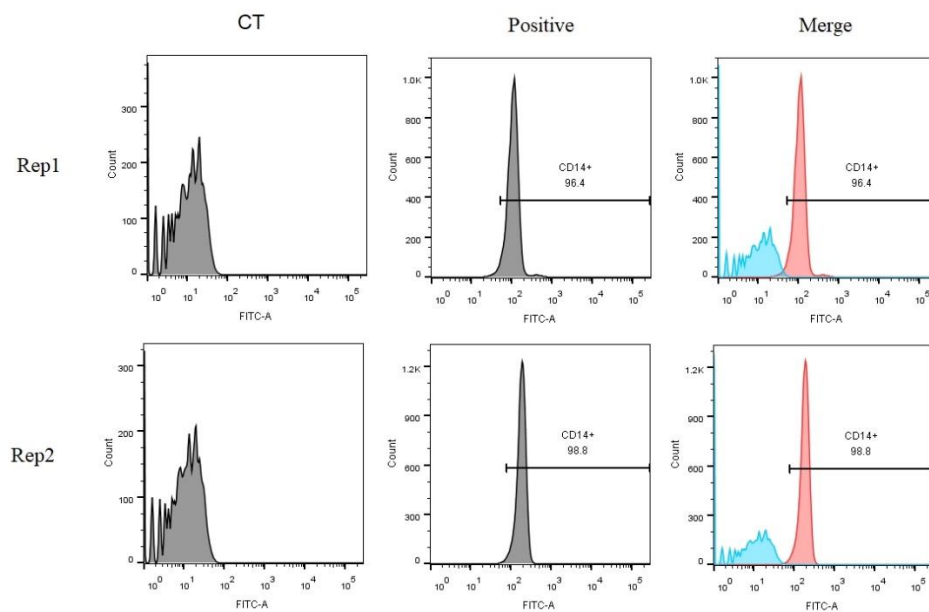

**Figure S1.** Flow cytometric analysis (FACS) of purified primary monocytes based on the monocyte cell marker, CD14. The percentage of CD14<sup>+</sup> cells are shown in the insets.

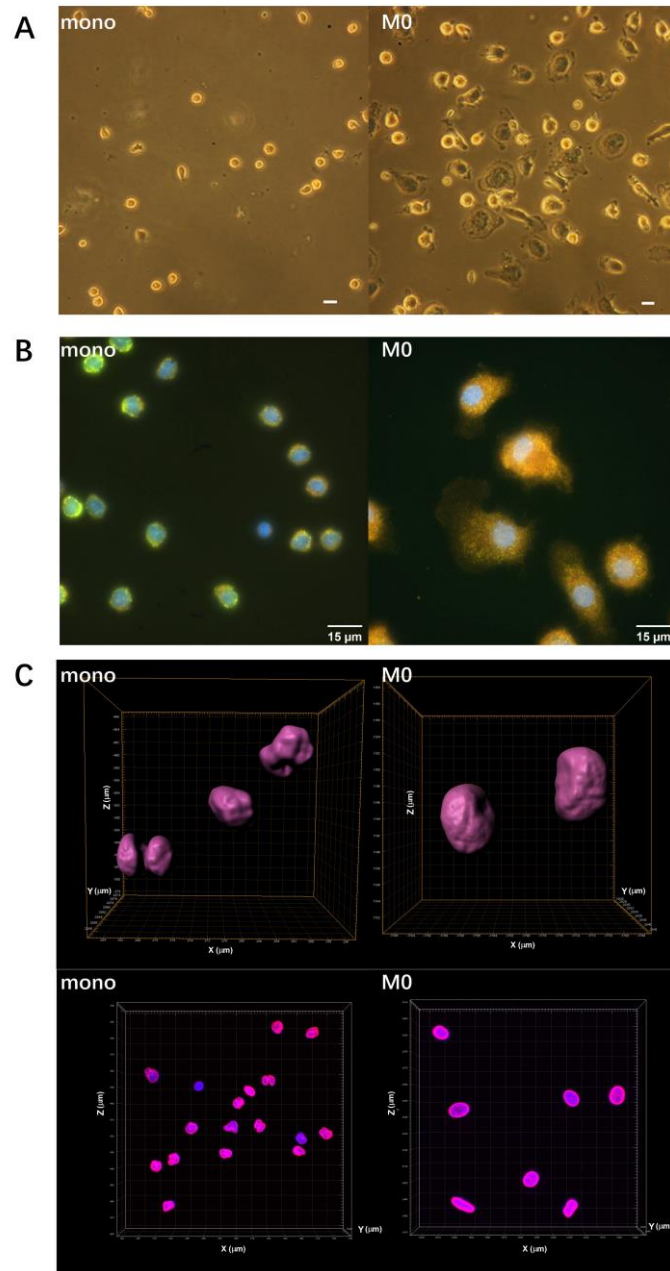

**Figure S2.** Morphological and immunofluorescence characterization of monocytes and trans-differentiated macrophages. (A) Cell morphology under phase contrast microscopy (40x). Shown are the purified monocytes (left) and the cells 7-days following NHS addition (M0 macrophages). Scale bar = 15  $\mu\text{m}$  (B) Immunofluorescence of cells labeled with the monocyte cell marker CD14 (green), M0 macrophage marker CD68 (orange) or DAPI for the nuclei (blue). Scale bar = 15  $\mu\text{m}$  (C) Immunofluorescence of cells labeled with the nuclear membrane protein Lamin B to show nuclear morphology. The upper panel is a higher magnified view to better show the change in nuclear shape.

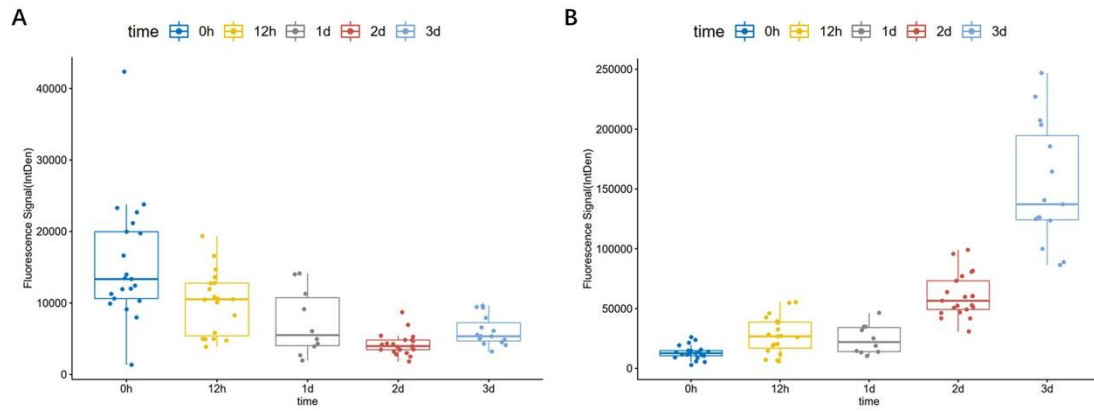

**Figure S3.** Immunofluorescence signal of CD68 (A) and CD14 (B) of cells during the trans-differentiation process.

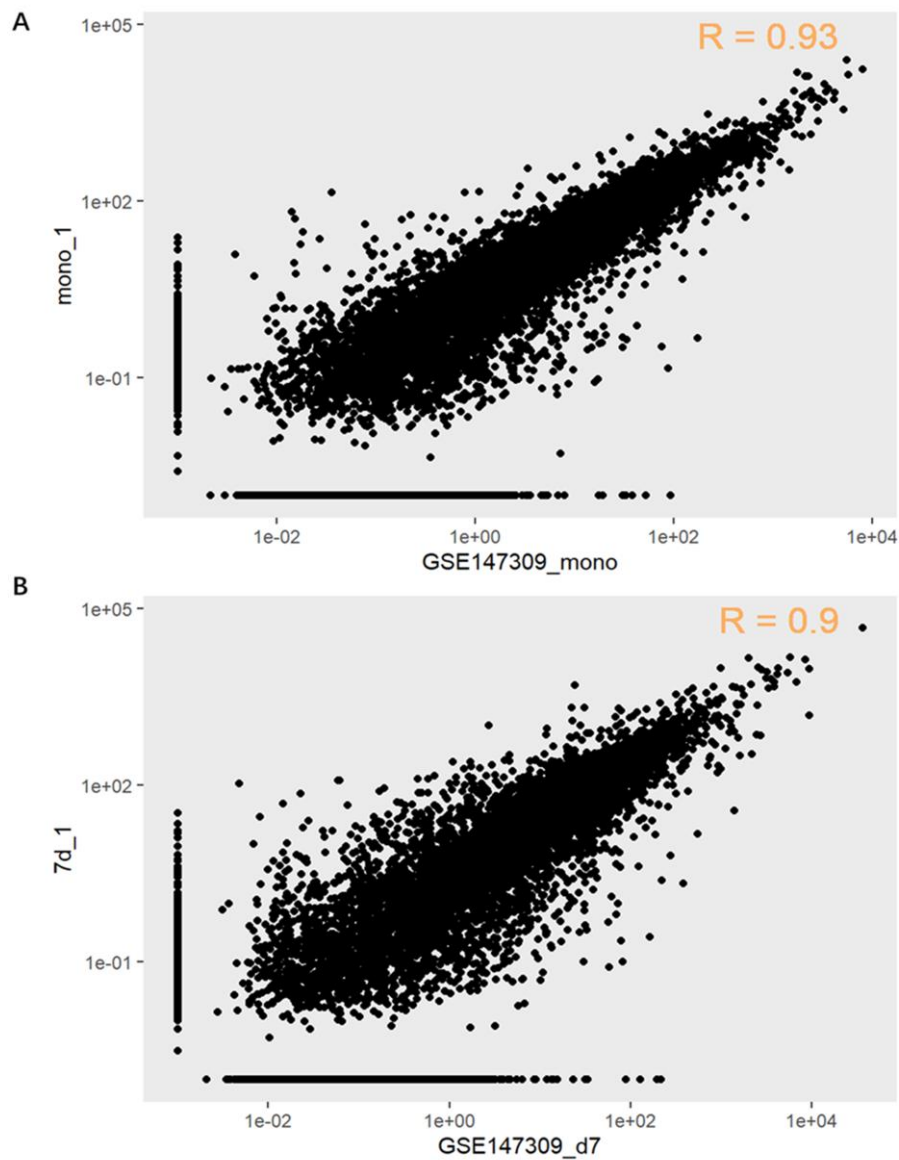

**Figure S4.** Comparison of the gene expression data between our results and those published previously[32]. (A) Comparison between our monocytes RNA-seq data (mono\_1) with the published data (Spearman  $R=0.93$ ). (B) Comparison between our M0 macrophage sample (7d\_1) with the published data (Spearman'  $R=0.90$ ).

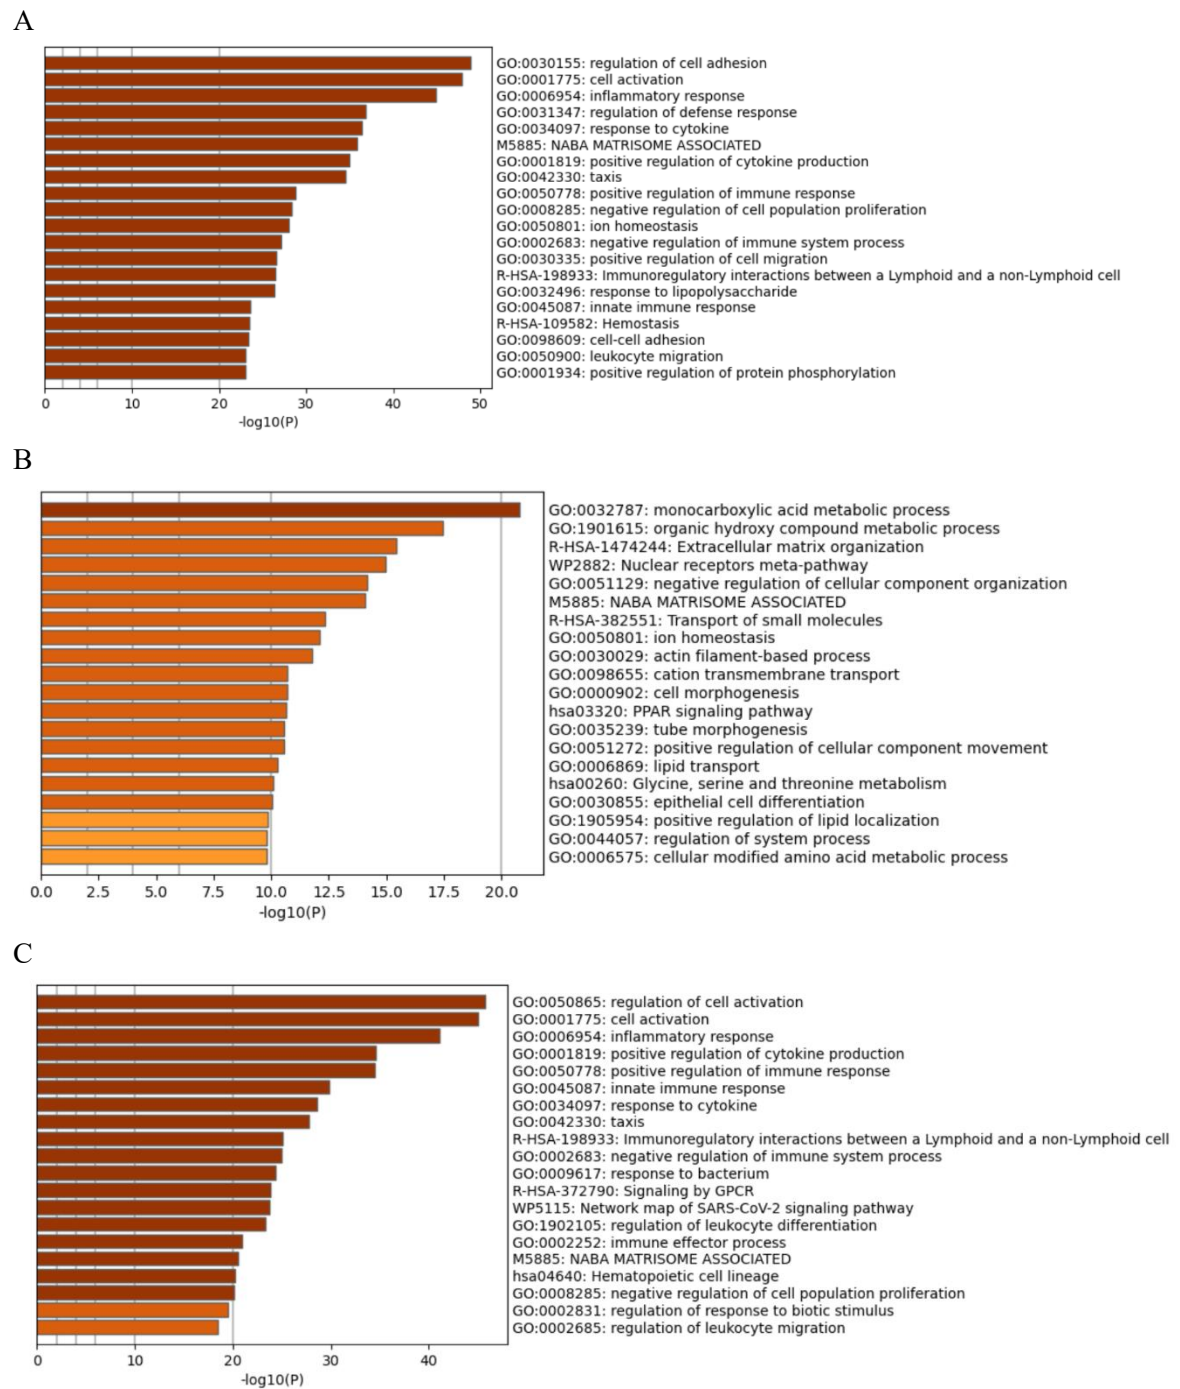

**Figure S5.** GO analysis of enriched annotated features in all DEGs (A), the up-regulated DEGs (B), and the down-regulated DEGs (C).

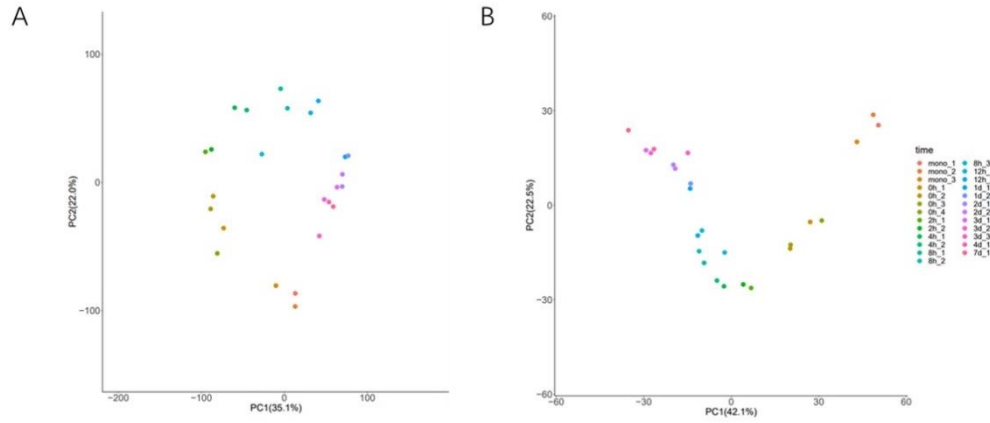

**Figure S6.** Temporal changes in the transcriptome during the trans-differentiation of monocytes to M0 macrophages of all replicates. (A) PCA analysis of the whole transcriptome. (B) PCA analysis of highly-expressed DEGs.

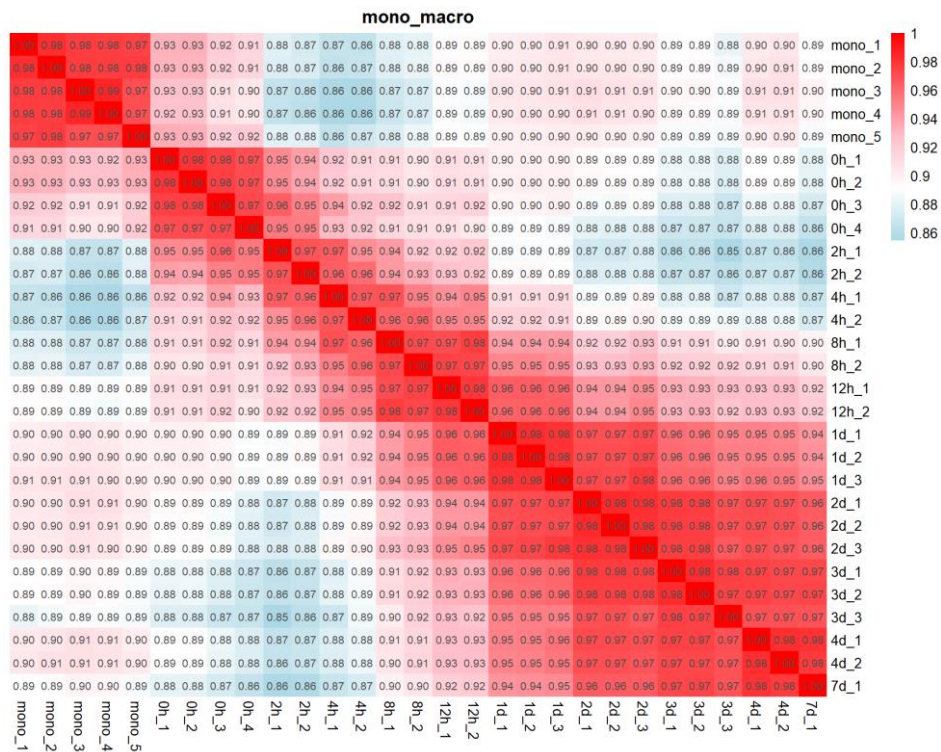

**Figure S7.** Extent of correlation between all RNA-seq data samples. Shown are the pairwise Spearman correlation coefficients.

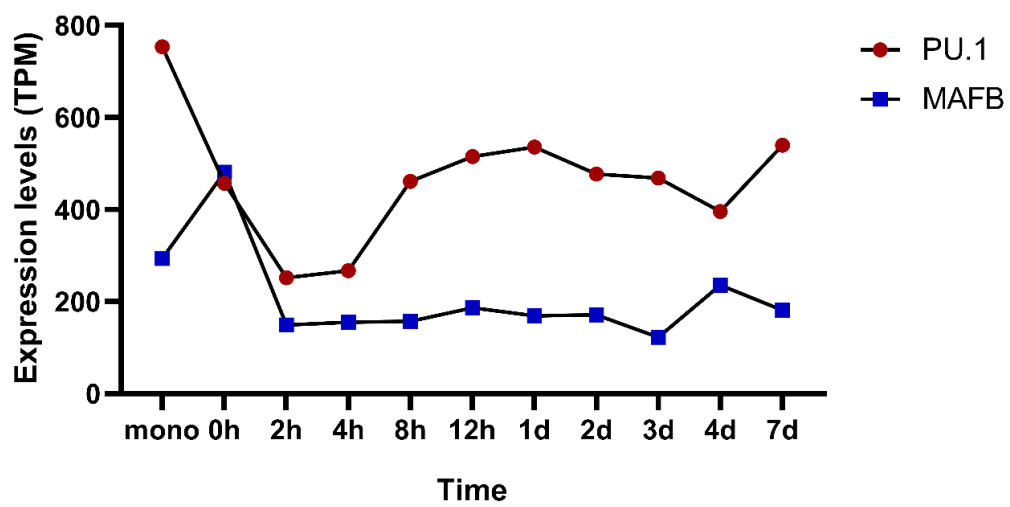

**Figure S8.** The expression levels of the well-known TFs, MAFB and PU.1, throughout the process.

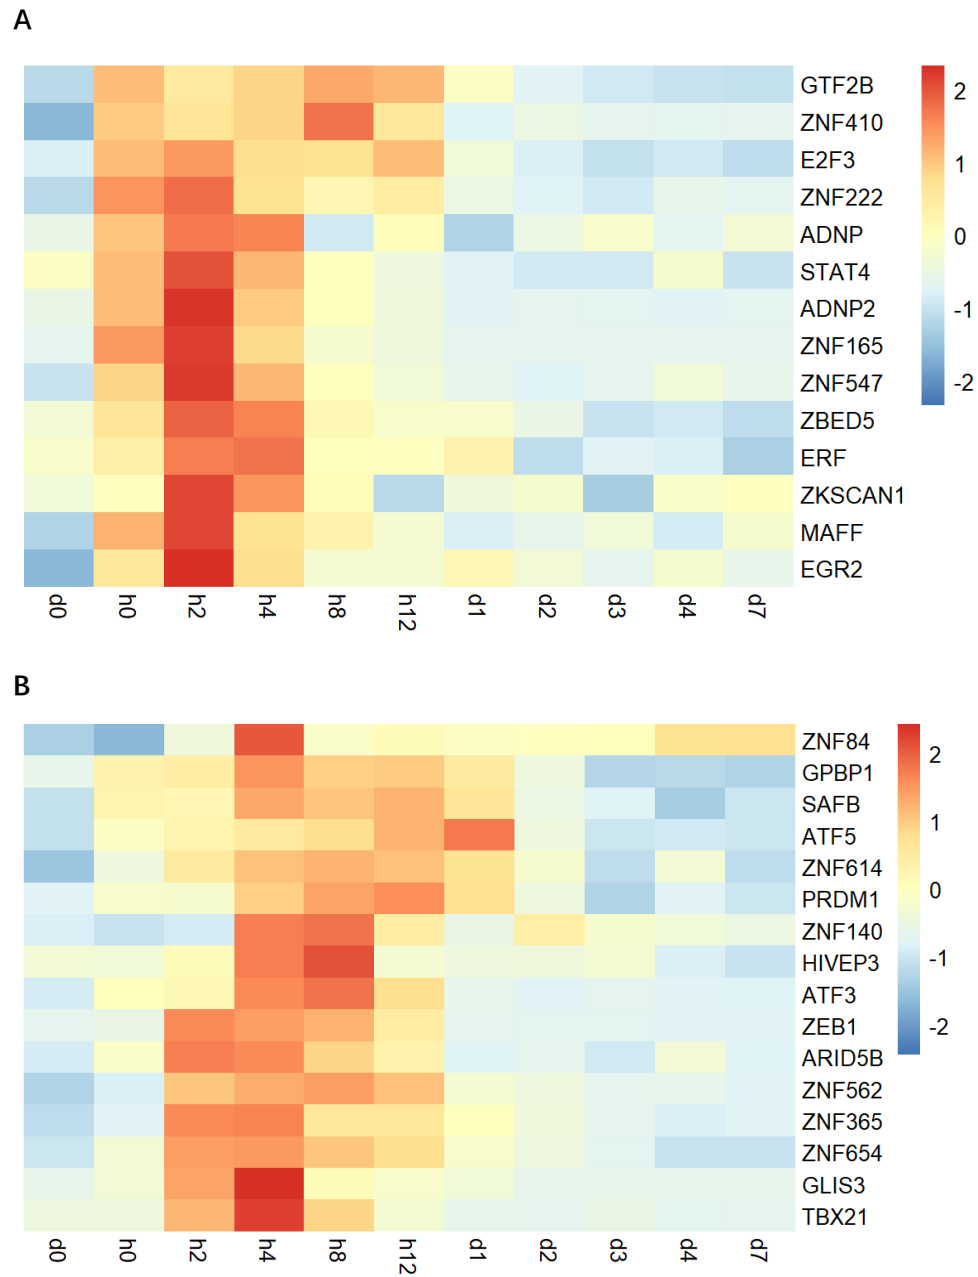

**Figure S9.** Potential AP-1 target TFs whose expression peaks at later time periods following addition of NHS. Up-regulated group 2 (A) and group 3 (B) genes with AP-1 binding motifs within their promoter regions.

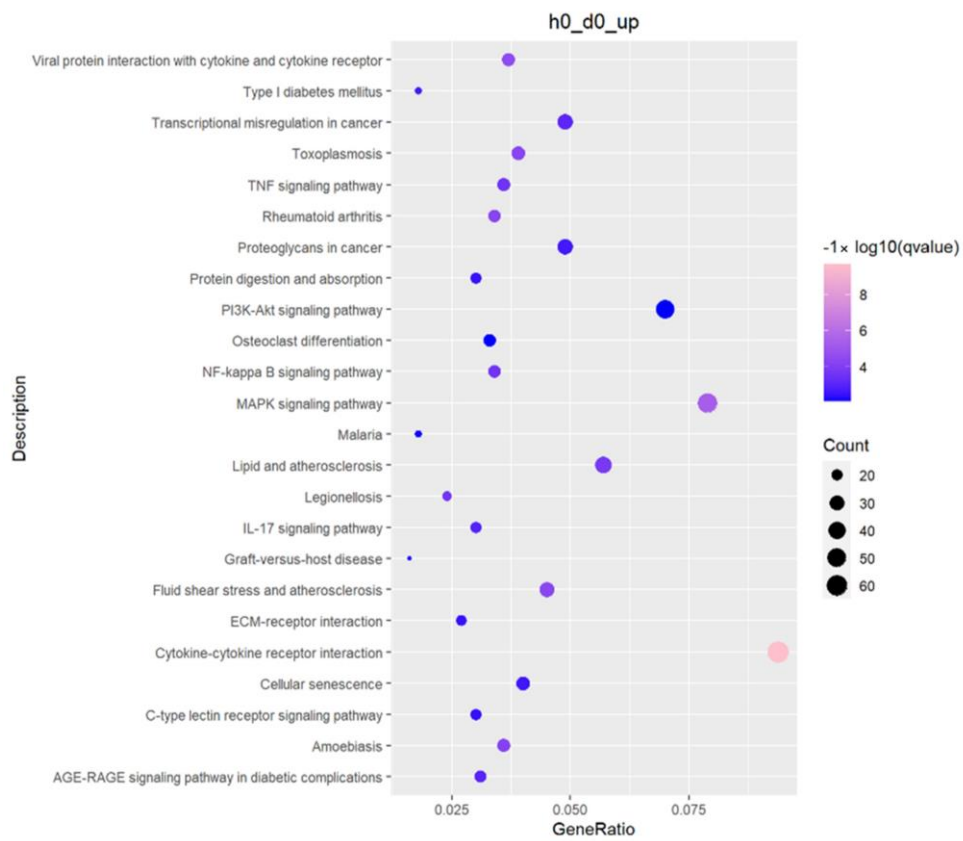

**Figure S10.** KEGG analysis of up-regulated genes at 0 h compared with purified monocytes. Terms with a  $p$  value  $< 0.01$  and  $p$ . adjust  $< 0.05$  were considered as significantly enriched.
