# Supplementary material for: Temporal Analysis Reveals the Transient Differential Expression of Transcription Factors That Underlie the Trans-Differentiation of Human Monocytes to Macrophages
Source: Int J Mol Sci. 2022 Dec 13;23(24):15830. doi: 10.3390/ijms232415830 (PMC9781183; doi:10.3390/ijms232415830)
Supplement: Supplementary file 1 [file ijms-23-15830-s001.zip › Supplementary Tables.xlsx]

## Sheet: Table S1
Supplementary Table S1: The average nuclear volume and sphericity during trans-differentiation.
	Average Volume [µm³]	Average Sphericity
mono	185.015	0.53
12h	278.76	0.58
1 d	337.94	0.67
2 d	394.49	0.71
3 d	537.66	0.76
4 d	599.78	0.75

## Sheet: Table S2
Supplementary Table S2: The quality of the RNA sequencing data of different samples.
	raw reads	clean reads	reads after rRNA removed	map rate	duplicate rate	batch
d0_1	27421957	27420226	26308306	0.9417	0.285	1
d0_2	30982939	30982218	29569099	0.9539	0.296	1
d0_3	40436824	40436685	38885463	0.9135	0.286	3
d0_4	36996774	36996651	35573610	0.9406	0.292	3
d0_5	22251257	22250324	21250586	0.9248	0.239	5
0h_1	29009548	29009454	27812564	0.9404	0.328	3
0h_2	31065471	31065325	29572198	0.949	0.311	3
0h_3	43592323	43590227	41030440	0.9483	0.349	4
0h_4	23462632	23461941	22472059	0.9209	0.241	5
2h_1	34247991	34246638	32592885	0.9546	0.295	4
2h_2	18761219	18760311	17969356	0.927	0.252	5
4h_1	40172337	40170401	38056414	0.9546	0.333	4
4h_2	18461698	18460797	17733407	0.9257	0.245	5
8h_1	37545014	37543159	35716638	0.9537	0.308	4
8h_2	21978033	21976860	21070850	0.927	0.246	5
12h_1	38570238	38569714	36855484	0.9546	0.356	3
12h_2	39166084	39164382	37294832	0.9559	0.3	4
d1_1	37017458	37017326	35525926	0.945	0.34	3
d1_2	28036412	28036325	27023210	0.9542	0.289	3
d1_3	38929417	38927335	37006114	0.9517	0.352	4
d2_1	47874055	47873897	46408347	0.9549	0.291	3
d2_2	27870128	27869921	26773407	0.9412	0.295	3
d2_3	37415139	37413175	35801897	0.9569	0.306	4
d3_1	35876117	35876002	34706925	0.9567	0.303	3
d3_2	35951873	35951366	34715924	0.9565	0.354	3
d3_3	18865378	18864329	18110349	0.9185	0.234	5
d4_1	28976525	28974919	27956845	0.9333	0.364	1
d4_2	32224332	32223686	31055927	0.9603	0.346	1
d7_1	30476136	30474623	29424030	0.9472	0.338	1

## Sheet: Table S3
Supplementary Table S3: 220 Up-regulated differentially expressed TFs.
	mono_1	mono_2	mono_3	mono_4	mono_5	h0_1	h0_2	h0_3	h0_4	h2_1	h2_2	h4_1	h4_2	h8_1	h8_2	h12_1	h12_2	d1_1	d1_2	d1_3	d2_1	d2_2	d2_3	d3_1	d3_2	d3_3	d4_1	d4_2	d7_1
ENSG00000149948	0	0	0	0.050943	0	0.682623	0.576331	1.5605	0.703318	14.2711	9.02811	24.6135	16.0489	19.2988	9.64067	4.10225	7.7095	0.645544	0.707247	1.56488	0.110739	0.14369	0.447661	0.189084	0.100244	0.309673	0.028042	0.022694	0.026646
ENSG00000102804	16.9917	16.9425	15.8188	16.381	8.45951	48.521	50.3163	76.5879	71.2074	76.2401	54.7759	49.1523	36.9059	61.9582	26.0665	44.682	55.5206	28.8967	30.4661	20.6526	28.3244	33.4668	22.3817	31.5464	33.531	37.0474	49.9061	55.183	51.6956
ENSG00000172379	0	0.043824	0	0	0	0.579479	0.596903	1.82784	1.95172	8.53551	15.3782	14.9198	15.551	8.87153	5.61505	4.29549	3.04982	0.91295	0.751267	0.326732	0	0	0.029052	0.014392	0	0.027414	0	0	0
ENSG00000104885	23.2072	15.7627	21.6099	21.7048	12.1778	80.2861	75.9162	113.569	74.6494	172.355	150.098	222.238	208.894	195.86	153.275	117.474	138.705	72.6264	72.7742	54.8948	58.7422	55.4787	39.1762	52.0051	54.7953	29.4457	43.8798	31.997	45.6142
ENSG00000157557	169.939	163.158	65.8253	75.802	166.682	655.791	657.422	784.361	551.861	545.265	418.426	334.133	325.326	328.549	272.247	282.277	309.551	115.862	115.745	96.7983	45.0615	42.7024	45.4463	24.3683	25.6744	18.887	32.2601	39.9865	17.0194
ENSG00000179388	29.6903	25.5098	2.05701	1.99672	21.1721	495.428	462.25	293.217	367.716	100.353	64.9337	26.6348	17.4642	8.92332	2.91973	2.05964	2.05185	0.876061	0.70752	0.206228	0.885199	1.45984	1.5146	1.06651	0.781484	0.126893	2.35741	2.34054	0.054976
ENSG00000072310	31.8055	23.6038	32.7798	31.6415	20.3822	60.353	60.0501	46.8244	58.5814	31.5798	31.5303	20.9081	21.8288	24.1447	15.8799	17.4331	17.0138	16.3278	14.098	10.875	12.985	12.3151	8.45528	13.8929	15.7402	17.6148	18.022	15.8999	20.3016
ENSG00000125740	336.621	347.559	636.25	688.087	288.838	1325.65	1193.48	608.431	874.094	213.803	175.345	51.6549	43.159	22.1271	11.8125	7.84701	5.40299	0.721413	1.29675	1.28149	1.23842	0.838608	0.259182	0.407181	0.319797	0.803129	0.478847	0.338058	0.564072
ENSG00000104856	35.8257	28.9755	34.7264	35.2187	38.2433	97.2014	96.0565	68.8121	70.3591	30.9356	42.4537	30.7291	33.5049	23.6034	21.2459	37.9152	29.1228	44.8064	44.4459	38.2624	20.3392	19.4024	15.3084	7.08713	8.74559	10.0608	12.1335	12.0451	12.5357
ENSG00000116809	23.0557	24.9157	23.1248	24.3389	22.2511	60.3658	50.3402	38.5524	64.8009	33.8263	55.2844	28.667	44.3567	28.857	43.8019	49.163	31.6142	36.3721	37.6001	26.4495	24.7266	27.4468	22.6002	25.6726	25.5368	23.8939	18.5471	18.1013	23.4151
ENSG00000171161	23.9775	12.7415	23.3158	7.70039	16.3304	41.3802	46.5224	44.1844	44.834	17.1608	37.98	34.3978	30.2363	9.38551	19.8096	16.6687	24.1257	31.4706	31.7881	32.0766	24.4639	6.85579	24.7593	20.152	21.8337	14.425	18.6406	14.7302	21.452
ENSG00000197063	26.5127	17.7686	9.18094	8.28126	61.5202	208.864	200.01	163.821	117.751	156.939	154.419	363.291	129.837	124.614	116.086	103.806	92.0431	39.0262	41.2179	38.962	20.4827	15.6152	26.8087	25.8512	34.3575	20.0104	24.7373	20.2786	25.7071
ENSG00000117000	43.2029	36.3023	26.1222	27.5572	40.0471	60.3735	57.4749	93.1354	60.4617	79.7037	53.5341	71.8683	46.4672	57.9425	31.7834	33.1752	44.6036	28.7882	29.0889	28.2702	20.4051	19.4513	23.9114	17.9741	22.5811	12.6212	19.9383	18.7313	18.3217
ENSG00000063438	0.1473	0.272026	0.186186	0.332118	0.035396	1.03761	0.702202	0.935115	0.203299	0.727083	0.958577	0.512054	1.07196	5.09352	6.7566	10.2742	11.4878	30.0113	27.6112	46.8093	61.9832	51.0814	44.9315	13.4814	29.0612	17.6785	14.8785	13.8373	10.9437
ENSG00000137309	64.2369	46.2746	71.9183	77.9912	70.0794	470.922	470.318	524.711	466.554	755.636	772.395	998.822	1025.61	1232.98	1181.75	1182.04	1189.57	829.392	851.165	618.939	533.354	548.498	508.756	393.141	407.795	324.086	239.516	203.163	251.317
ENSG00000160199	7.32694	7.95045	7.78717	8.54575	5.57572	30.6787	31.5185	36.2995	26.6331	21.9123	22.422	57.5292	45.521	34.4012	33.8026	24.6028	23.4062	16.9501	17.9531	13.9753	7.48625	7.41441	12.2206	7.05771	10.0435	7.59634	10.274	9.973	10.3109
ENSG00000124216	11.8647	13.117	2.38789	1.91354	51.2685	398.163	359.025	261.188	369.433	122.535	98.0629	70.9434	50.8642	38.084	26.1007	16.1558	14.7304	4.12596	2.40752	1.28723	0.605459	0.257158	0.576384	0.199879	0.1182	0.435117	0.14879	0.178524	0.70174
ENSG00000135625	0.390166	0.370804	0.085277	0.033586	0.08418	21.768	22.6573	10.7539	11.3185	2.92747	0.69375	0.491917	0	0.248972	0	0.042994	0.094869	0	0	0.041887	0	0.054121	0.081938	0.121776	0.042008	0	0.158638	0.042795	0
ENSG00000119725	30.6993	27.9879	27.2412	29.6582	27.7332	65.5825	71.525	69.1189	51.6568	51.5572	67.4816	51.718	73.8019	78.6489	71.28	56.5013	61.7308	44.4316	38.4428	39.1005	44.0174	40.6804	48.6001	47.6168	41.7673	38.4445	39.5081	43.914	42.6422
ENSG00000134107	163.086	202.365	91.7734	87.6479	273.194	557.813	545.216	345.288	394.589	290.119	285.08	170.296	171.799	122.927	136.833	131.837	114.161	100.288	104.264	82.1265	68.2633	74.7812	65.1725	91.5459	86.5589	73.9353	73.2931	78.718	76.6148
ENSG00000130844	10.6619	9.57912	4.89136	6.84824	12.0696	379.488	381.447	197.329	254.029	142.015	93.4699	66.3687	14.4309	9.56555	15.6787	19.4828	18.4791	30.3821	22.1175	22.8144	20.6022	16.228	16.5427	17.5342	16.426	10.4988	21.9561	28.3874	28.7935
ENSG00000153207	27.0023	22.4352	16.2538	16.7987	24.1977	50.6263	54.6796	38.4932	25.5208	28.9552	18.8393	37.0458	25.275	44.0364	22.994	27.6409	46.9861	36.5293	40.2505	45.9446	35.4423	36.0544	42.333	30.1048	33.9627	19.1203	25.903	25.9695	30.3366
ENSG00000122877	61.5164	61.5558	10.2657	11.1211	67.5799	494.348	493.317	475.904	588.427	812.849	971.606	482.574	624.555	327.974	343.217	343.289	324.161	472.134	465.124	344.043	366.509	378.445	233.202	265.671	264.53	235.593	350.04	348.168	262.426
ENSG00000167394	13.8576	12.877	9.54195	9.83798	7.1076	50.949	40.8108	29.0543	32.7174	51.2979	33.5569	46.2594	22.9236	29.6021	18.7418	21.5435	23.7454	18.1656	19.1706	12.4864	17.2978	15.5124	11.6339	15.3971	10.8666	6.65881	10.473	6.87558	10.2699
ENSG00000157933	34.7831	25.4938	40.8947	44.3452	22.29	106.76	107.248	87.6976	103.724	42.8992	40.6215	26.546	26.7034	22.9927	19.7125	30.3616	26.311	35.6481	35.4508	27.3156	25.2307	25.0157	24.2552	19.2671	18.8122	9.9797	10.4658	6.49832	10.1548
ENSG00000138311	0	0.447811	0.096946	0.191483	0.287413	1.34972	1.95105	3.98223	2.46843	18.5193	14.8322	17.3359	16.525	12.7806	8.66156	9.69892	11.6907	6.51698	7.04587	8.00388	5.22351	5.21129	3.48669	2.9399	3.6575	2.42255	1.7181	2.38608	2.42227
ENSG00000185022	50.5136	46.0241	4.58167	4.54959	29.7545	229.247	306.836	136.921	540.709	286.5	535.445	165.395	320.254	160.535	242.13	179.419	93.2342	48.9092	96.8808	85.6408	105.028	111.521	89.2126	154.667	64.8159	167.342	74.1339	60.5306	146.098
ENSG00000006704	0.031543	0.037472	0	0	0.067828	1.00493	0.499051	2.96777	2.66935	13.114	15.672	20.4643	19.6969	15.3688	19.7828	8.32884	9.56653	7.0777	7.30439	6.95851	10.3583	8.46167	11.8646	14.0418	15.7258	13.5157	9.33462	8.28812	10.0571
ENSG00000251192	3.78997	2.40223	2.34944	3.36739	1.91834	15.7511	16.8431	22.437	12.098	20.0501	8.71128	13.424	4.94465	10.2124	4.63384	6.26452	6.78699	5.9506	5.86552	6.95938	2.49145	2.76778	4.06694	2.46243	2.41602	4.0716	2.97946	2.52307	3.30711
ENSG00000111424	22.6693	22.6622	20.5981	22.2207	26.5389	142.507	134.322	147.373	160.951	125.412	144.261	81.9449	121.52	50.1735	62.6543	58.333	51.7465	90.611	91.7652	56.3776	44.5499	44.7203	43.4902	24.8311	24.2124	23.3825	13.3108	15.9291	11.6079
ENSG00000175592	28.4522	21.0642	1.24564	2.8176	20.5909	215.648	207.975	190.068	120.357	140.18	91.6378	122.029	91.2854	112.721	79.4523	74.5697	84.2394	23.7816	25.1405	26.1833	9.2672	15.7199	10.9218	12.2363	7.1362	9.83268	7.86543	8.12988	5.18491
ENSG00000184221	8.63081	7.69352	12.9555	12.0158	2.54305	38.0635	34.3393	34.4083	29.3397	24.1459	11.0902	18.8757	9.36758	3.831	2.55552	4.96838	4.07815	3.59338	5.66019	4.96749	0.358249	0.459451	0.459407	0.907965	0.196922	0	1.87291	1.06993	0.800505
ENSG00000114315	34.7424	33.0047	1.19234	2.39877	28.2266	183.465	176.334	54.3749	107.903	22.9165	19.1519	17.7992	11.4747	13.7054	6.53725	14.614	5.58821	0.69709	0.849545	1.42381	0.046995	0	0.061173	0.091525	0	0.116224	0.079487	0.064328	0
ENSG00000169136	69.3821	56.7362	52.72	50.2184	44.8087	93.6213	94.6403	102.174	136.815	72.9985	173.435	101.277	175.274	112.485	186.053	191.724	152.718	251.069	238.956	102.708	84.7162	92.0695	81.9658	61.7637	51.2037	69.6409	60.9498	65.0438	61.4665
ENSG00000167491	51.0862	43.5237	45.1901	34.5196	49.629	95.0854	158.116	170.789	133.256	56.8047	72.2072	89.069	100.45	69.4523	91.2551	40.1065	65.2478	62.5501	63.7317	46.8599	36.5441	55.7199	51.1005	37.221	57.6148	64.6348	54.3559	47.1556	81.4835
ENSG00000185947	71.1543	57.7223	40.7652	40.9244	68.5891	520.82	539.802	657.227	391.102	438.693	245.731	247.363	168.345	203.075	156.301	138.816	184.155	117.283	112.986	142.313	62.7893	61.31	81.6368	52.3595	58.2988	48.8274	62.8359	60.0076	58.3113
ENSG00000198026	32.132	30.4696	34.5439	38.0835	28.0593	59.5267	52.544	57.2297	71.1895	56.6853	63.0782	44.6492	35.5371	27.1673	25.6731	24.2831	20.6654	22.0728	23.1439	18.912	19.5565	20.8289	15.4562	17.5778	18.0526	16.7941	15.0049	14.1627	15.7069
ENSG00000175197	228.208	266.619	69.851	67.8171	456.183	390.553	424.266	294.602	631.703	193.408	148.281	162.576	103.365	156.433	127.179	203.842	202.17	183.994	206.004	112.046	72.3672	77.7361	107.54	67.4795	71.4507	63.1566	64.5455	75.8428	68.5968
ENSG00000128272	578.898	582.621	474.266	472.48	515.25	1521.28	1557.62	1393.14	1394.55	1153.9	994.613	1057.86	924.89	1060.15	647.775	952.107	812.867	565.522	554.97	409.312	355.908	451.994	425.51	305.907	295.133	261.538	342.059	482.444	257.973
ENSG00000173276	49.7144	39.5586	10.0075	13.7751	33.5645	120.456	118.008	133.533	90.4862	99.3641	76.7925	75.2101	80.036	57.6051	56.6982	41.2374	51.8841	33.6104	34.4626	27.9468	28.0424	29.709	31.9777	31.2142	45.3548	26.8418	31.0927	28.5505	26.7393
ENSG00000112242	36.483	32.3133	30.6031	28.1254	42.1012	66.8732	66.6713	64.4912	62.0988	73.5901	66.7321	61.1946	57.3985	66.4958	49.1414	63.1306	67.0104	42.5184	40.951	40.4781	32.7591	34.9494	33.8483	32.3872	34.5119	23.4954	29.7831	34.6035	29.6448
ENSG00000165606	0	0	0.111264	0	0	13.5684	13.6981	12.136	7.24803	33.7207	25.3576	21.667	16.1411	14.5611	4.96384	2.47513	3.80473	0.073475	0.119678	0.109303	0.027194	0.117688	0.053454	0.035308	0	0	0	0	0
ENSG00000165030	203.468	195.585	50.677	46.8985	172.733	277.569	289.144	248.326	206.142	78.8835	62.4041	35.0097	29.1782	27.9228	16.7896	27.5532	24.4614	29.8558	30.8723	33.4315	25.9032	25.917	24.3594	11.6382	12.7845	6.86166	17.3603	18.7631	12.4885
ENSG00000177374	3.26931	0.705139	0.279003	0.780545	1.1686	39.1735	33.6696	27.3305	21.954	9.82736	7.33312	6.43159	6.02874	2.80184	2.07596	0.773647	1.57356	4.64083	3.91278	5.13137	2.84525	3.20205	2.17706	0.865062	0.779875	0.116381	0.441644	0.048231	0.037753
ENSG00000171606	14.0904	13.8	12.2242	12.8892	13.4552	57.8577	59.1933	58.7202	42.7558	88.1891	49.0144	68.2702	36.3798	30.9195	20.9948	27.8333	25.539	23.592	27.7428	27.316	24.0673	27.5588	24.3552	23.9031	25.8651	19.6417	35.5892	33.7323	33.7844
ENSG00000131848	4.19845	7.04763	6.74566	7.02261	7.0808	9.96824	10.499	13.3753	9.43749	66.586	77.7345	43.0888	66.1393	30.299	22.6168	11.5201	14.3804	7.79502	10.5093	8.64293	15.4077	19.3864	5.25183	11.2581	9.47936	9.1204	10.598	12.6282	10.6436
ENSG00000178860	0.457476	0.253618	0.324963	0.112352	0.098702	7.76908	7.99009	7.85275	8.29814	27.8802	67.0633	35.14	66.5597	56.4735	91.3655	149.52	108.218	281.145	268.124	253.732	153.6	165.249	134.939	124.236	123.063	120.835	64.0927	48.0752	60.5181
ENSG00000189308	12.8384	9.16866	10.3457	10.5555	8.77777	28.2161	30.109	35.8231	21.2028	50.7488	30.1058	27.1055	23.2611	19.544	9.54406	9.37034	25.2306	17.2074	18.6692	19.9013	17.9429	18.0295	20.572	19.3531	21.9599	16.576	21.8681	8.70256	20.5814
ENSG00000116044	117.334	56.818	57.8592	59.4447	152.979	531.833	532.836	536.698	446.017	96.2188	125.781	274.407	266.141	294.63	244.123	279.022	96.4191	217.256	235.92	101.245	65.2793	146.083	199.654	54.221	188.797	62.6032	51.2453	71.6189	68.097
ENSG00000136870	8.77125	6.76769	7.48589	8.09174	7.00912	19.1008	19.5075	24.8423	16.1028	39.7841	30.1777	33.1097	28.7326	28.1233	21.9167	25.1531	29.9483	21.607	21.8412	27.9979	17.9068	17.6939	24.3588	20.6117	23.7333	19.5986	17.4549	17.509	16.6484
ENSG00000196843	61.8882	55.283	46.5735	49.7455	56.9977	349.735	292.971	260.163	339.938	161.954	202.281	93.0931	104.773	66.9468	71.1628	96.6649	59.8103	52.5328	51.6735	45.2131	38.7163	35.5951	28.7688	23.3281	27.1875	28.1194	30.9129	23.8307	22.212
ENSG00000198517	32.0793	31.5171	16.9994	17.1352	28.9783	207.965	195.021	151.274	151.914	129.417	170.849	136.63	160.738	133.574	120.248	127.165	100.98	56.6109	53.2019	41.5704	34.5151	22.9223	33.133	36.1377	36.932	37.7791	33.2362	26.2269	39.8745
ENSG00000066697	4.93613	3.47603	3.43293	4.92969	4.79762	10.1545	9.86449	24.7316	14.123	56.8944	55.8691	55.1725	58.5048	64.0203	64.8634	69.9818	58.9369	149.21	149.785	135.032	58.8495	79.4017	58.4779	66.8406	68.8015	65.3847	23.7953	26.8073	32.4979
ENSG00000167034	0.282933	0.135044	0.272403	0.156742	0.367075	5.31947	6.16507	6.71026	7.33523	20.6061	21.94	33.4397	34.6121	14.4456	14.8121	9.3068	6.47814	1.6886	1.37848	0.395076	0.136027	0	0.089424	0.192117	0.24441	0.112138	0	0.09372	0
ENSG00000173451	12.1791	16.2113	9.5223	11.9518	12.2812	128.762	134.652	128.194	88.9492	143.751	84.2047	66.1758	35.484	25.1812	11.672	11.0929	13.5559	7.80044	8.62774	11.0907	4.31289	4.86053	9.01397	5.50394	5.6929	3.33812	4.13466	3.77466	4.2625
ENSG00000172819	4.57361	7.34176	9.12151	8.59038	9.69104	26.6326	28.0808	15.0503	18.9653	27.2309	37.6833	60.8916	77.8947	43.8819	63.9134	26.9739	26.8345	19.7087	24.5038	20.1938	17.0429	14.7757	15.3839	12.2849	11.2458	10.3064	2.6712	3.72695	1.45968
ENSG00000111145	68.1006	59.8132	51.9355	53.2365	48.9525	175.641	165.639	202.205	132.009	179.044	139.735	107.625	82.1256	92.2969	69.7163	83.5951	96.0941	27.7898	26.7179	32.9942	15.3885	15.7867	18.5548	9.13936	11.313	6.37043	11.5201	11.6506	8.40283
ENSG00000095951	21.2053	21.5816	15.8198	16.4906	22.0623	75.7	72.8578	103.75	71.6719	92.2149	81.1384	61.5838	48.5641	32.2917	21.632	18.347	15.8476	17.8486	21.6535	14.9964	22.8224	19.1467	10.9566	14.4644	15.7573	11.2072	21.0915	20.1863	18.8143
ENSG00000101126	53.0923	45.3437	9.97203	15.8757	25.5338	73.71	24.0828	71.139	71.2076	72.9225	73.904	73.0988	71.3798	16.7522	28.8899	49.3218	34.4365	18.146	11.5506	22.1013	9.18663	40.6048	44.3474	35.6428	43.3157	32.577	17.8498	36.9327	34.703
ENSG00000137947	54.677	62.6048	31.3246	31.6703	80.5848	136.596	157.111	160.454	171.523	125.02	135.371	142.158	151.531	183.797	148.266	162.237	158.622	98.381	94.344	115.134	68.2831	68.4994	78.1813	58.2831	69.4747	63.4535	59.5158	60.5429	56.5078
ENSG00000174796	12.3508	11.8444	9.88609	9.91724	4.83817	8.2105	11.4662	14.1155	11.3879	11.4827	8.189	15.1416	9.43846	16.3914	11.1932	13.1909	10.9997	18.126	19.1342	21.9504	22.2705	16.5362	24.1206	16.4779	16.5483	11.4636	16.2121	14.9883	11.7685
ENSG00000120690	184.626	176.898	78.3886	130.663	190.415	588.174	563.532	651.966	402.603	430.504	288.308	311.622	224.32	273.362	184.545	192.818	223.59	146.301	147.408	171.665	146.814	156.29	168.507	125.692	148.114	93.6328	127.302	126.981	116.404
ENSG00000172262	31.416	27.0155	26.795	27.9762	21.4201	56.0419	49.4176	52.8994	36.8076	42.4825	24.8831	23.9955	21.7433	27.5739	23.5173	34.7749	38.5568	36.6397	33.1141	30.457	32.0559	26.8284	36.8628	25.84	28.6971	22.7709	27.596	29.1834	24.5847
ENSG00000138378	9.10283	6.694	4.59311	4.53109	5.4893	7.01748	7.56993	15.4949	16.1985	16.1755	15.7371	9.73413	14.1675	6.85485	6.25767	3.4056	5.53749	2.10975	2.81999	4.07888	2.1888	2.11379	1.9975	2.08731	2.37572	2.0435	4.89921	6.03873	1.8459
ENSG00000188290	0.117089	0	2.36955	1.6965	0.245649	38.3695	42.782	50.9257	39.9375	26.0261	18.6292	26.1202	3.16198	10.5678	2.38413	1.68078	2.98586	0.192659	0	0.469995	0.071305	0	0	0.092581	0	0	0	0	0
ENSG00000125812	67.5748	58.7811	16.6937	18.7526	54.6015	105.688	113.154	66.3251	105.81	15.3185	12.9256	8.67552	7.92831	13.4737	8.98294	16.9783	16.8018	17.1586	17.5678	15.5235	13.1783	11.0051	15.1753	11.3878	10.5956	6.90233	14.1342	13.631	12.0317
ENSG00000167395	10.941	10.916	15.951	17.5977	8.70915	53.1902	44.7452	46.092	50.1242	57.5583	58.5233	72.9192	65.2935	52.7007	55.6457	44.2011	40.5871	36.7244	33.395	26.1184	19.6131	17.6313	22.3356	28.4222	26.3185	20.0245	16.4634	14.2428	19.3873
ENSG00000188785	30.2693	29.7022	22.0734	20.0072	31.7107	62.0125	65.9915	48.6645	72.2593	66.9135	44.3434	35.101	31.7031	21.5609	16.7331	13.408	16.9348	8.87519	12.8054	11.3137	13.9593	12.5544	10.9149	11.2607	12.4827	9.67368	16.4581	16.7937	14.0239
ENSG00000143842	0.127255	0.250916	0.324224	0.498529	0.143	3.06378	4.58239	4.52108	5.79325	8.75915	9.25616	9.69713	11.4475	8.23259	12.5767	6.67157	7.15378	5.15694	7.16075	3.12898	5.27159	4.99723	4.64523	9.99852	9.73629	12.6811	10.2622	9.67767	21.342
ENSG00000179348	0.622898	0.631296	0.225287	0.252161	0.255983	13.0696	15.1479	19.9859	12.1968	20.1167	15.4922	6.27938	4.95498	1.78529	1.15154	0.292625	0.583479	0.317897	0.135701	0.280236	0.143161	0.152508	0.28862	0.028596	0.377571	0.136176	0	0.025084	0
ENSG00000136997	7.11412	4.78189	8.99686	8.89109	5.04847	22.8755	17.2192	23.2089	2.99535	32.0626	42.3971	13.0886	28.5019	17.6179	17.2845	35.8438	24.2878	28.3214	25.9278	24.5556	20.0803	33.9817	21.5592	20.347	19.2084	16.1131	9.12377	25.2976	8.66504
ENSG00000143067	16.0139	13.76	9.01509	9.26109	11.6793	64.3076	66.6315	100.118	77.7209	96.3588	93.5479	75.0005	75.023	81.7222	60.1626	51.2705	62.2771	37.0547	35.0359	35.0736	28.1803	27.5602	20.9478	23.2376	25.3323	24.6173	22.3395	20.9457	28.683
ENSG00000123358	114.829	105.71	35.2622	38.3589	177.292	1177.97	1081.39	662.624	1168.33	319.834	267.854	113.986	77.0394	36.9336	21.229	20.2432	13.613	2.52002	4.40663	4.19184	1.74435	1.45348	1.67266	3.33115	1.57306	3.46021	2.68697	3.70809	1.10189
ENSG00000109320	79.3538	85.0664	68.6973	68.8361	58.4187	343.974	393.585	489.191	569.857	270.141	472.798	184.354	223.644	127.319	139.316	154.318	124.63	113.371	107.334	98.1771	57.9847	56.333	54.6818	38.4061	41.8837	39.808	47.1248	51.3394	46.3055
ENSG00000152433	0.304099	0.443308	0.36049	0.291178	0.1458	5.24371	6.23036	4.3827	8.23768	13.4756	6.535	8.39396	5.28639	5.06034	1.78691	2.3165	2.27107	1.44671	2.26542	1.22254	0.877513	0.538762	1.89079	1.82432	1.50289	1.31187	3.1221	1.45922	1.61348
ENSG00000172216	43.6345	33.4782	35.5033	55.9729	68.4725	456.995	523.09	773.502	358.654	512.254	316.843	595.444	294.853	414.349	228.909	229.378	428.702	216.941	209.514	271.353	123.586	111.952	256.341	132.557	165.721	94.0623	113.286	59.4719	153.365
ENSG00000100219	161.671	211.796	111.464	126.415	170.549	392.632	435.227	646.085	384.97	276.267	149.229	333.034	110.899	275.817	122.49	237.931	246.933	158.911	144.805	239.098	117.416	113.619	209.842	77.4154	97.3123	48.7717	64.9142	71.6475	70.3899
ENSG00000115844	0.075456	0	0.091349	0.061519	0	15.6607	14.5217	9.00483	3.23645	4.33378	0.622605	2.52581	0.55202	0.941053	0.150613	0.33323	0.183474	0	0.053218	0.121512	0.151157	0.104667	0.039616	0.117755	0	0	0	0	0
ENSG00000150347	5.58874	6.62804	5.14381	4.79232	9.41279	12.3094	14.2124	22.1831	17.1605	40.1826	41.6233	43.8342	35.5407	34.3929	25.7113	20.6264	23.3186	7.00102	7.71384	7.38682	10.2218	10.3865	8.205	6.26341	5.85914	3.4473	12.553	14.815	7.67091
ENSG00000152784	0.637484	0.697888	0.841902	0.361695	0.146281	5.0484	4.67394	3.59237	2.96514	8.92504	11.4027	11.8136	6.72254	3.66333	1.37253	1.09642	1.69884	0.048929	0.184882	0.224606	0.126765	0.031349	0	0.070538	0.024333	0.044787	0.322024	0.049577	0.131072
ENSG00000197279	0.483161	0.20872	0.048001	0.385015	0.14215	22.5619	17.7156	20.9304	25.0979	38.4719	20.1486	22.6468	8.16586	7.00391	2.06396	3.24915	2.27034	0.447925	0.61999	0.518709	0.425044	0.270501	0.497832	0.242929	0.094582	0.304654	0.505651	0.506182	0.340292
ENSG00000095794	9.97464	7.89178	7.09396	6.84119	10.4451	226.887	262.534	357.689	372.831	523.836	432.91	331.511	229.373	148.589	149.678	73.0076	91.6768	20.9981	31.1431	19.8137	20.1292	16.8831	20.8055	17.1765	17.6822	14.223	23.8151	15.5074	13.0362
ENSG00000181315	5.87883	5.00888	6.76495	7.51331	3.97883	15.7097	14.8736	19.8634	11.3177	25.3258	18.1503	34.5494	21.7812	36.8455	24.7003	30.5146	33.2518	26.0765	26.7518	30.5745	15.5692	14.0036	30.1837	20.6442	21.3012	14.541	14.7273	14.7552	18.9099
ENSG00000113580	80.3897	69.7328	31.439	46.0352	52.8639	125.761	103.086	138.394	48.114	210.079	184.739	204.78	201.684	167.754	147.43	105.708	116.448	62.5367	84.1763	90.2123	74.4938	79.6732	73.34	57.6588	65.1479	44.8796	67.4994	60.941	60.4193
ENSG00000169155	21.7719	20.0176	5.72909	7.7249	21.5652	177.425	175.884	198.321	137.055	67.8761	139.012	47.8061	100.213	33.8622	69.1088	16.9759	20.9235	29.2409	7.62686	25.4775	5.00342	21.0494	6.64622	5.739	5.40986	6.26096	6.62918	4.82377	9.33765
ENSG00000172000	0	0	0	0	0	3.46717	5.34408	5.45134	6.51565	15.3215	8.97058	21.2347	7.52119	10.671	1.03412	2.13999	2.84317	0	0.158911	0	0	0	0	0	0	0	0	0	0
ENSG00000112658	48.1155	45.5128	41.2432	44.4977	43.7817	114.507	106.883	87.0516	82.5827	42.1692	53.9567	40.182	50.9886	34.2658	32.7482	40.2911	38.1767	42.4192	43.274	30.652	38.6952	36.8888	33.281	35.9311	34.7099	33.9784	28.9296	30.9267	23.7741
ENSG00000177426	39.3748	33.8446	21.246	17.9137	47.9872	566.738	496.23	276.416	506.705	390.808	361.274	145.452	97.2375	121.931	85.5896	111.604	91.4525	68.0754	67.1355	77.4748	36.5552	37.6063	47.2303	37.1933	30.6392	27.1367	35.9175	42.5896	36.5753
ENSG00000116016	1.70433	1.33575	1.51396	1.16331	1.06089	9.46568	9.69942	15.2841	22.527	27.6637	47.5417	64.0287	78.886	102.143	68.4131	54.8001	58.8941	37.0829	39.1279	39.7513	122.848	126.501	117.433	231.174	235.085	209.299	181.722	176.203	231.514
ENSG00000169016	16.3176	13.2772	10.2508	12.2228	19.2552	42.0265	46.1547	53.7687	46.2855	52.6864	59.5868	64.3733	61.4995	70.0825	54.4255	53.5732	65.7205	48.3612	45.2358	40.8619	29.5207	30.0496	32.9997	25.3955	24.2265	17.6879	25.415	23.0019	25.3845
ENSG00000112033	18.5101	18.7712	22.8529	24.2591	24.9788	33.4788	34.576	39.3443	76.5772	29.0656	37.3463	24.5364	48.4314	38.549	69.7496	53.4963	52.5477	52.8603	48.2463	36.5474	39.8467	31.1863	24.7165	29.7606	28.8277	29.2904	24.5689	20.3415	22.0262
ENSG00000153879	38.8951	41.7999	39.3876	38.572	30.2396	84.993	87.3761	113.394	82.2181	107.648	56.607	65.235	42.4848	90.9868	47.8631	102.416	97.5672	89.5426	86.3355	81.4937	55.3844	58.9442	80.0168	54.2906	57.8003	37.9024	44.5929	45.8788	38.2849
ENSG00000105856	181.092	128.612	60.437	62.1374	156.908	197.025	185.863	215.264	205.237	237.208	170.114	127.976	95.7336	90.2006	68.1434	72.687	80.4227	61.7576	69.3939	78.8711	51.6384	57.0727	65.9488	43.6559	52.5867	37.4407	60.3501	53.5215	69.1673
ENSG00000107249	0.277629	0.477841	0.366638	0.286917	0.179697	2.47591	1.72436	2.49992	4.24484	20.1918	16.2761	26.9777	28.434	7.39173	6.06731	4.09174	4.14022	2.2357	2.79946	1.71534	0.34518	0.308907	0.203773	0.177415	0.276117	0.192562	0.056315	0.182657	0.098325
ENSG00000075426	243.513	249.546	130.919	171.766	89.9266	360.801	611.882	453.155	300.254	348.401	339.338	240.58	242.331	201.604	177.608	145.395	145.062	79.8365	78.9233	70.4299	33.3925	24.769	39.1208	22.2038	21.8807	12.4014	10.627	27.9634	23.947
ENSG00000136603	49.7516	28.063	34.1625	28.5276	34.5749	242.555	214.821	374.089	248.903	349.792	287.862	213.417	156.307	80.9615	58.6591	68.8681	85.6144	40.8055	54.8222	60.9808	54.5006	67.9213	61.0191	43.002	33.0535	19.3817	20.92	16.7299	22.3327
ENSG00000131759	156.745	137.479	193.011	190.155	114.048	441.878	388.446	348.72	386.07	214.624	206.348	161.778	130.845	100.027	72.7862	78.7412	68.5611	55.3563	56.4853	51.934	61.9701	61.1932	44.7959	52.0654	49.8245	38.6853	32.996	24.5153	34.9745
ENSG00000205927	0	0	0.06201	0.017464	0.091818	60.7573	59.334	80.8893	53.8302	112.999	49.4964	55.2448	8.3214	20.1199	2.61754	9.71921	19.7233	18.2299	18.7552	7.14399	0.76265	1.21019	1.8582	0.339445	0.257293	0	0.038452	0.046678	0.258448
ENSG00000159885	0.549955	1.68369	0.974216	1.77818	1.80884	20.8879	22.1014	30.9045	20.6177	39.5403	12.9495	22.8253	11.1591	13.6487	12.0145	12.3496	17.1928	6.58999	5.78473	8.20382	3.94118	3.68561	6.26985	1.27177	3.8785	4.88798	6.25171	5.7538	5.27038
ENSG00000178573	5.48208	3.69613	5.21284	4.68898	2.76251	8.16336	8.99746	10.3325	10.7369	10.1287	11.3973	16.5612	12.6268	14.9195	8.23543	5.50075	8.08899	9.00071	7.59839	9.11503	31.8816	27.3765	28.1079	33.9465	45.1253	22.071	66.6969	58.5951	45.6231
ENSG00000125618	2.41328	1.75559	1.84248	1.94429	2.03088	3.21034	2.44112	2.93286	3.27982	9.93519	12.6759	15.9463	25.6411	14.0657	26.0665	26.5746	20.4067	15.1726	13.2494	10.0376	5.63595	7.06245	5.15629	6.07929	6.11616	5.20305	5.36502	3.85434	4.42258
ENSG00000102034	96.7203	109.271	104.583	107.496	133.342	255.169	235.036	215.601	212.499	139.997	161.779	119.709	150.936	113.324	152.998	119.225	104.902	88.6157	94.0946	70.4348	80.8708	79.1812	72.041	77.7304	83.3736	77.2013	57.6839	61.3963	59.3733
ENSG00000162772	41.6365	107.444	25.4822	30.3433	96.749	686.268	742.151	537.223	550.237	611.067	785.478	1340.9	1904.76	1673.12	1796.62	1048.55	1152.49	242.268	166.989	261.852	141.76	159.65	111.344	190.762	181.769	223.386	149.074	139.901	103.711
ENSG00000159216	48.1993	45.1912	41.6631	42.0535	35.9676	127.905	186.529	180.542	101.359	123.017	90.1443	107.54	93.4221	126.221	94.7958	113.182	139.938	82.4245	94.8718	113.021	68.3454	71.0674	89.7699	56.1005	70.1498	37.0502	62.4373	43.2476	54.2484
ENSG00000182759	0	0	0	0	0	2.36125	2.6429	5.69611	1.27757	16.4698	10.6169	8.10808	3.78365	2.08026	0.787078	0.477966	0.24018	0.085371	0	0.042333	0	0	0	0	0.212277	0	0	0	0.152348
ENSG00000168152	3.63919	4.64616	2.77954	2.58665	4.03594	12.23	12.5926	13.3317	9.51908	18.2306	11.8189	13.7842	5.47291	7.78667	3.47738	3.25322	5.29237	3.61707	2.60383	3.44138	3.69522	2.93707	4.25113	2.11204	2.16695	2.51953	3.6194	3.7859	2.63268
ENSG00000077150	101.952	98.717	75.1244	71.8418	104.225	226.282	223.07	196.297	267.333	107.279	181.858	91.6063	141.323	70.3694	100.685	127.737	93.4826	128.057	120.392	120.65	50.3248	49.6791	51.6272	22.2773	26.6498	24.0118	30.1508	34.295	33.7906
ENSG00000136169	21.8099	16.1439	19.2428	18.9623	9.98503	55.787	53.7387	54.9283	49.3531	44.5595	36.6404	37.6941	32.6167	30.3725	27.7994	25.2619	34.1947	37.1577	41.1636	44.971	43.9086	43.7134	51.6232	48.6752	54.1092	43.2995	57.5122	57.0583	51.7121
ENSG00000169057	21.4826	19.4416	17.6226	18.4103	20.6039	44.0137	43.0515	37.7821	49.1567	42.034	49.076	44.1648	53.935	49.0913	52.063	49.0195	43.7407	27.033	25.9925	22.51	19.0051	16.9538	20.6555	21.5865	21.9095	20.7534	21.3141	18.1223	21.3937
ENSG00000153234	158.541	143.329	49.7798	70.5607	98.3795	576.342	574.563	374.079	451.655	174.334	136.276	39.4102	31.8447	19.8385	7.44026	6.11142	7.26259	1.56052	1.75668	1.70189	1.15879	0.726716	0.745379	0.508153	0.378946	0.052823	0.807676	0.830138	0.439868
ENSG00000087903	12.4274	10.8033	12.5469	11.6392	12.7836	46.8768	35.2052	18.9308	10.8902	9.34988	6.68148	9.6235	10.4563	4.21762	5.28007	4.59379	3.29652	10.3405	11.7317	6.72	6.94154	7.01138	3.89607	5.24855	6.71698	5.23157	4.25746	5.02587	4.20664
ENSG00000144655	263.358	283.241	130.715	131.616	281.307	866.197	859.513	570.419	543.591	314.03	271.481	131.51	120.859	85.7028	85.6315	54.099	54.4894	25.9812	24.8067	18.3506	13.6899	14.1665	8.96276	7.59967	6.94154	8.50903	7.77231	7.17187	6.01755
ENSG00000146676	43.5249	37.0415	18.3418	19.2726	33.1477	224.702	223.647	271.178	204.584	232.881	128.841	127.592	77.134	84.166	46.4374	46.1986	70.3418	38.335	39.4966	45.1767	34.925	34.8288	44.8908	40.9667	44.6443	28.6766	38.0338	34.6126	34.9746
ENSG00000142556	3.72842	2.63521	1.71178	2.0546	5.00331	6.22996	6.12076	4.3559	6.64794	8.80592	8.23672	10.3237	9.63139	11.3377	9.22095	8.84198	11.1268	9.54169	9.17409	7.96561	5.70695	6.58807	7.01189	3.84935	4.8438	3.36508	6.10492	6.34938	3.98134
ENSG00000160633	82.5536	69.3676	79.7858	82.7248	42.0802	122.931	119.723	144.523	132.107	109.196	145.333	188.421	162.231	178.657	148.723	177.988	164.441	162.942	160.351	112.495	94.7641	95.3699	93.9697	84.7625	95.1743	69.0089	59.6173	57.8919	73.7604
ENSG00000122482	25.3696	20.598	11.8741	15.5111	18.3528	57.1545	74.5671	55.5016	32.2305	36.5677	37.7892	48.8796	51.9309	67.1597	42.8605	42.9384	45.0068	26.6134	36.9932	42.6097	34.6058	30.5171	33.3913	23.3671	32.8849	19.2953	26.5134	21.0312	21.6566
ENSG00000156273	204.619	233.537	124.964	124.85	193.157	567.589	567.091	666.434	457.24	522.859	446.274	311.824	272.432	349.262	207.643	262.152	306.54	231.705	196.485	275.261	199.241	166.597	261.412	111.187	118.375	93.2968	180.846	195.988	158.528
ENSG00000123095	0.144718	0	0	0.074234	0	0.801184	0.500062	0.653078	1.4882	0.91373	0.535987	0.665542	0.126341	0.461736	0.695676	0.518363	1.53852	9.16676	8.29251	10.8742	43.3021	42.9844	15.0137	27.621	30.527	26.9787	54.3034	50.7026	60.235
ENSG00000101544	20.361	19.7844	14.4703	14.9208	24.3204	72.8267	62.1006	94.3662	63.9504	126.562	98.9289	61.4864	75.5364	45.9401	30.8047	27.621	19.2447	14.274	15.0008	7.50052	16.4911	17.441	14.5443	13.7147	16.7863	14.0094	10.0862	16.2514	13.869
ENSG00000188313	124.718	99.0384	130.655	113.721	128.949	199.313	180.106	272.076	252.84	244.892	194.742	118.997	103.831	92.0896	67.9869	68.5241	93.3914	74.8917	74.0043	84.5842	57.1211	56.3692	59.3979	39.8589	59.6705	43.4356	38.5299	37.6754	33.1226
ENSG00000183340	8.74846	4.64096	5.76468	4.5164	2.20909	15.7875	18.1665	26.2683	14.8819	27.2632	22.1901	28.1153	16.7188	20.516	17.9898	21.4221	24.9396	22.7512	23.6995	27.3258	19.1458	14.8721	27.0954	17.2982	22.6071	12.8067	22.308	21.1968	19.1378
ENSG00000117036	64.8913	67.2785	33.7799	35.0815	73.0224	335.22	343.245	291.794	307.414	214.384	163.665	101.424	92.1679	70.3782	57.8671	53.3492	59.9599	33.3238	36.6697	34.194	21.8776	21.6564	25.8418	23.8643	27.6947	26.1369	24.4295	24.5494	25.5833
ENSG00000132170	2.03745	4.10844	0.991807	1.38216	1.70982	184.886	177.255	316.402	246.452	424.087	405.948	449.062	339.474	297.999	168.71	133.156	152.132	89.4663	84.4319	86.906	137.397	152.855	106.182	146.067	146.718	103.295	79.4815	87.9796	93.686
ENSG00000164683	0.241848	0.127693	0.04405	0.099246	0.474254	18.5341	19.3091	15.5502	18.85	16.12	14.7769	9.73208	6.74979	4.39827	1.08704	0.73472	1.18562	0.152718	0	0.389607	0	0.27956	0.042325	0	0.043398	0	0.05463	0.044211	0
ENSG00000010818	9.45187	9.57937	6.39779	7.08099	6.89466	19.1424	17.9324	50.3974	38.3444	42.4479	58.7195	30.7838	40.2592	35.7963	33.3109	30.3235	32.9097	10.521	10.4088	6.80337	2.69591	2.81154	2.61845	3.42258	3.56406	4.85049	4.5058	5.2458	4.95481
ENSG00000119508	3.37034	3.38363	0.337584	0.430493	2.98355	730.173	704.217	741.537	660.42	190.371	139.678	96.8302	87.9103	38.5044	34.9472	10.3068	11.8825	7.39064	7.95736	10.1532	41.8269	41.9401	25.8162	61.5938	58.4544	48.2699	42.6482	54.4775	23.8408
ENSG00000186300	1.40488	3.43086	3.11741	2.96953	2.30965	18.1996	10.1625	9.57983	13.8799	33.6303	19.3927	29.4311	14.9751	16.391	4.45312	7.3125	7.48655	4.36824	3.71919	3.58696	2.39824	2.32769	6.59394	1.86245	2.44688	2.71052	1.66204	2.91813	3.36453
ENSG00000126767	31.0862	29.4834	32.2942	31.0419	25.7499	29.342	28.535	33.5749	31.2779	43.0814	54.2208	80.8598	89.9567	93.0829	72.1674	93.1461	76.3796	65.1956	61.5063	54.9634	57.3184	50.4928	51.1439	56.7692	52.8142	46.991	40.5941	31.0882	36.8531
ENSG00000131196	11.4401	11.985	15.6883	18.2703	8.02273	30.8578	35.1864	19.2057	25.9088	22.0051	35.9562	19.4612	15.4104	16.7381	10.4936	8.23214	7.13675	8.13222	8.21039	12.8649	8.16995	8.61374	7.37195	7.13993	8.14083	8.12419	10.1197	10.56	11.1567
ENSG00000131931	16.6289	14.3131	14.5437	13.7917	9.1988	11.1876	11.5815	14.0187	10.4314	27.0581	20.8165	49.4165	37.3665	49.8208	32.0531	37.0396	42.4727	34.5633	30.8405	38.1417	25.8163	28.7467	35.5366	19.7141	22.7483	12.9151	17.1877	15.4882	14.6971
ENSG00000140968	136.724	127.555	130.173	137.226	106.09	145.029	172.586	235.501	94.1835	187.494	241.733	417.142	417.87	585.268	356.725	149.892	316.348	153.546	228.067	198.765	132.547	120.144	108.564	113.927	111.295	145.321	115.435	163.844	189.997
ENSG00000029153	1.455	3.30115	2.04696	1.58803	1.27114	3.09354	2.39297	3.72594	2.02099	4.7895	3.43027	2.83059	4.53256	4.23241	3.6156	9.26603	8.14134	21.5225	22.507	11.5475	8.54294	8.39463	8.76977	6.88235	5.97896	4.95983	3.20337	2.8937	4.05166
ENSG00000197608	5.78268	3.5218	3.74689	5.86397	4.84736	2.72227	3.61623	4.81665	3.13705	10.1969	9.30254	23.2547	11.2267	27.9988	20.0919	17.3811	24.8414	12.7546	13.5041	4.70132	3.09773	3.26932	9.06069	7.18309	7.7	11.9383	8.98409	8.77647	2.9016
ENSG00000213588	1.30757	1.02549	1.70708	1.49199	1.83587	1.19796	1.20044	1.23312	1.27086	2.40802	3.37592	7.56773	7.62677	8.78418	12.3847	16.0589	11.8043	18.2788	16.9502	17.4142	12.4058	11.3484	12.4996	13.5808	13.7909	14.8538	12.8144	13.8915	12.9769
ENSG00000215421	12.0163	9.65814	5.32847	6.59703	8.33565	8.97973	8.20948	10.0656	7.2438	13.5111	14.3477	21.7796	21.9818	28.4739	19.1269	17.4323	19.3214	13.0006	14.3692	10.8655	12.6216	13.5149	11.5949	11.4604	12.0052	10.374	10.2362	10.1675	9.75799
ENSG00000175105	15.2465	13.7531	13.3459	13.8541	13.4554	20.6394	17.3913	31.2881	16.7642	46.7231	35.9177	47.8656	36.6565	48.0013	26.4887	28.2891	40.4492	19.4622	22.3787	27.0432	17.7275	17.1863	24.3082	18.6784	20.5232	11.8358	14.2745	12.6095	13.054
ENSG00000186130	6.90146	4.663	5.56311	5.5278	6.63828	2.6133	3.02044	4.55872	3.52584	14.1692	13.9065	24.3365	22.2693	33.1242	25.9722	22.9474	31.4543	20.4483	21.3039	25.1857	16.206	15.8744	22.5835	16.9771	18.5811	11.9433	17.7534	15.5562	14.4083
ENSG00000172006	2.84994	1.94768	3.06766	3.29617	1.42928	1.80147	1.40056	1.5281	1.63508	7.3642	5.05013	14.2252	7.31582	10.3878	3.96504	3.62424	5.34936	1.46478	1.3468	1.96086	2.05179	1.74628	1.26311	1.46747	1.78091	1.90466	1.45375	1.83281	1.59555
ENSG00000186020	2.63547	3.56406	3.19142	2.46738	3.70792	7.03252	6.19655	7.17831	1.49354	10.5145	10.7911	17.5358	4.19987	12.8491	10.3733	7.23632	9.45028	7.34689	5.58978	7.22857	3.89046	5.09263	9.02905	5.61747	5.46392	4.71314	6.74764	6.15755	5.42659
ENSG00000084093	37.3006	31.2855	22.8835	22.2382	19.8966	22.9413	24.5883	29.9969	15.5718	45.902	42.2356	43.1827	33.344	41.4718	26.8362	44.8081	54.6566	51.0454	53.5554	51.6996	39.2174	40.925	53.2584	38.1715	41.3001	29.6347	36.0519	30.6447	36.622
ENSG00000090612	5.91257	2.6867	2.11791	1.3364	2.84172	1.80407	2.69793	2.71439	1.37072	4.82375	5.12106	11.9943	11.9015	15.5438	14.981	16.063	5.07923	16.2062	5.38242	20.8	19.2905	4.24685	17.9194	20.6308	19.7342	17.6549	6.791	5.60656	17.6549
ENSG00000198783	16.6723	20.796	18.4348	16.7777	25.5898	27.1404	24.8197	32.8122	34.8069	32.2688	42.7026	46.5881	48.3475	42.7045	46.2881	48.8511	46.869	39.0195	41.3527	40.0679	24.9361	24.0626	32.8931	27.7567	26.3288	26.1223	22.2182	23.4013	22.1426
ENSG00000236287	66.7842	67.6812	54.8631	56.703	43.3781	77.9426	76.3571	97.0002	64.2629	118.323	96.99	114.102	88.5413	74.892	62.0104	54.1973	68.3043	63.291	52.8711	65.6329	46.7858	48.5752	61.0896	44.0236	48.5402	33.2307	45.5659	41.3662	39.4525
ENSG00000115816	36.742	37.1877	29.4791	25.9522	30.0211	38.4992	44.8992	59.7074	34.9923	56.8795	52.932	105.527	86.1799	128.409	95.049	122.633	132.55	111.335	119.014	122.03	79.3208	80.7052	94.2032	66.405	67.6015	38.5575	59.514	60.4569	56.1434
ENSG00000183621	12.0707	14.3712	17.2414	17.7107	16.8918	17.6933	18.6055	33.3672	30.9803	70.4537	61.385	61.5118	44.7457	46.2313	34.8707	48.1825	56.8239	47.5909	49.9071	44.8308	38.6127	37.7388	33.5068	22.9309	26.9931	24.3401	32.4388	32.5444	30.3816
ENSG00000105497	4.22044	3.39294	2.79587	3.95301	1.01285	0.630293	0.63212	1.76927	2.0379	4.97686	5.75966	8.90673	10.5177	10.1689	8.28423	11.9473	13.4879	11.7966	11.6092	12.4548	7.21385	6.90117	10.3355	6.91796	8.02465	4.11083	6.7842	7.06143	5.28593
ENSG00000178764	8.12915	8.20405	7.02391	6.29495	6.7059	6.37823	6.81053	9.22169	25.2141	19.0293	24.035	16.7093	15.0528	9.44034	6.20723	9.65614	10.1114	9.6573	9.51026	9.36686	7.67036	9.14843	8.06327	7.26961	6.29305	6.34856	4.34448	4.43544	3.13299
ENSG00000167562	8.86991	7.94687	6.71291	6.56623	8.74082	7.69281	7.22535	7.20779	6.98828	13.3162	12.3644	25.1293	23.3281	27.9662	25.6158	20.9152	26.9579	15.908	16.1533	23.3518	13.1842	13.0396	17.4274	14.5158	14.0277	10.3902	15.4717	16.7304	15.7472
ENSG00000196152	4.19189	5.16012	5.06834	3.22073	2.94081	5.17145	5.53685	5.54868	6.68576	6.22743	10.2806	12.3932	13.3698	11.9831	12.1806	19.7396	17.1821	17.9633	18.356	18.8242	12.826	9.33015	14.1184	11.0677	12.3958	13.1466	8.40561	9.24763	9.45432
ENSG00000124782	45.5038	34.9086	41.0724	39.8332	40.1118	44.107	31.1837	40.5934	35.7031	58.9999	57.9018	72.9291	72.6712	55.6193	39.2951	38.9101	49.5322	62.8259	48.8918	53.8059	61.7973	58.5883	41.9099	47.0322	58.6771	39.9932	50.3388	38.6244	46.1567
ENSG00000010539	3.89024	2.45632	3.04817	4.53748	1.90386	4.17818	5.64898	5.85547	7.19667	5.94075	7.40975	15.5293	17.965	12.2004	17.7719	18.0225	19.1629	12.1701	16.2648	13.6993	7.25311	6.0006	15.3666	7.31265	9.55766	8.36074	9.42816	9.45169	8.96283
ENSG00000157554	0.135042	0.145439	0.134119	0.044932	0	0	0.126996	0.041482	0.054764	0.71077	1.33092	5.03604	10.7827	8.8661	11.6173	0.922636	2.38971	0.039803	0.013699	0	0	0	0	0.013168	0.015416	0	0	0	0
ENSG00000169635	9.16895	10.0609	2.15512	5.72403	8.48213	4.80688	4.86411	3.56494	3.37115	8.29345	11.8721	14.0184	6.3198	15.0584	3.95564	6.91709	4.66193	11.5932	9.69538	3.70678	7.56458	8.41732	8.0126	9.20658	8.17261	7.74482	7.41254	6.14081	8.65045
ENSG00000166478	26.7747	27.2178	20.4731	21.578	25.7212	40.2786	35.8972	42.525	47.2226	54.0978	55.5089	58.7534	64.1059	48.9167	59.584	43.212	52.4273	44.0498	41.3242	47.9733	23.2024	27.3399	33.335	21.2251	21.3292	17.2413	16.7202	21.1289	15.8242
ENSG00000073861	3.70166	5.27983	3.13745	3.15252	2.61263	3.56543	2.63821	5.04172	4.67118	19.2059	36.7592	29.6593	59.0346	17.7708	30.2923	4.24179	8.96141	2.21906	1.26932	1.56683	0.591284	0.524077	0.906797	1.6282	1.39714	2.59996	0.322493	0.252746	0.506982
ENSG00000105722	25.4111	16.8951	25.8949	27.6563	23.2433	51.2057	20.0116	33.3817	24.7836	49.3454	51.1553	49.5216	53.5249	29.4495	23.0897	21.4518	30.6312	27.4522	34.629	30.1129	8.01397	7.54909	15.2529	15.7857	15.5611	15.3299	18.8994	10.0344	7.46418
ENSG00000171466	20.3061	22.3862	17.1879	17.6676	18.0503	24.7071	29.7096	36.4451	23.6105	72.5621	65.2264	81.6166	66.1187	99.7878	54.6588	78.3597	60.8692	39.3415	36.9519	45.6743	29.8221	37.1035	43.0746	36.503	34.3248	25.8483	41.0878	26.495	30.2337
ENSG00000170325	13.8207	10.0552	5.41041	7.43732	9.71406	8.71895	7.98722	11.5088	11.6946	13.5802	12.4046	17.7094	13.118	19.9039	17.0234	15.3332	18.9817	12.3133	12.0904	13.4103	10.5446	11.715	12.7005	10.6414	10.2247	8.89736	9.10174	8.76806	10.8222
ENSG00000170396	2.80076	2.03133	2.8037	2.89782	1.8512	0.706302	0.747079	1.07946	0.654009	4.66723	2.97924	4.36475	3.14947	13.5418	6.80917	13.3193	19.4942	10.9259	11.2115	8.05146	10.7864	11.5297	9.90947	7.4179	7.12505	3.49649	5.34098	4.49518	4.7608
ENSG00000164011	2.61537	2.95796	6.20479	2.84259	2.21407	3.37744	2.06761	1.05514	0.739885	7.90693	19.2538	12.0206	16.5318	10.7277	16.9834	12.8269	12.9884	13.8048	14.6523	14.8013	9.59259	10.3222	12.6673	10.3922	11.4959	12.6721	9.18372	6.98235	4.28786
ENSG00000110925	12.6855	13.4034	11.7656	10.2699	6.6993	12.5408	11.1342	17.2011	15.1845	16.0092	29.1981	24.1897	34.9783	34.7104	39.5048	33.4034	39.5444	31.2749	31.6562	28.2005	14.2608	14.4342	20.8761	19.0374	21.6718	18.7637	12.7744	12.6355	17.2573
ENSG00000176946	17.775	18.3581	20.2257	24.0289	18.7367	24.3176	24.3434	33.5953	47.5405	67.204	123.438	79.2114	97.2879	49.7411	28.9712	32.7283	26.661	32.156	28.5245	26.7846	27.1613	27.6132	23.8449	22.8849	22.7883	24.7899	23.2275	21.4736	22.4191
ENSG00000196652	7.52605	8.34219	6.52094	7.09093	9.05402	9.539	9.70333	13.0884	11.121	14.9768	14.5607	15.7031	15.2767	20.0019	22.8935	19.8335	20.6136	15.3768	17.8199	16.3479	12.3028	12.4438	13.0166	11.4329	12.0822	8.77475	10.171	9.97703	8.94084
ENSG00000102908	18.3025	16.0896	15.7227	17.6875	7.96638	15.579	23.7559	42.7986	32.1704	63.6702	33.1042	21.0243	28.6546	20.2922	14.781	11.93	19.5849	11.5171	10.3664	9.69352	8.59257	10.0324	10.7921	11.3365	9.57408	13.2763	10.5008	6.9983	11.8086
ENSG00000187098	8.77035	9.48312	7.11785	7.4099	13.2791	10.1066	8.21177	19.2362	5.92742	17.2059	33.8767	48.8998	60.5494	75.74	109.497	60.7	82.9537	152.675	164.127	72.8603	91.5447	84.5789	181.069	72.7419	87.7092	111.711	105.144	107.393	227.978
ENSG00000148516	2.74259	1.84302	0.651815	0.75453	1.46662	1.18817	1.1588	3.72519	2.41119	35.0356	21.9311	21.0075	31.5766	31.2472	16.7485	9.96185	19.4277	0.943623	1.13512	0.901431	0.278805	0.286778	0.876832	0.528153	0.572226	0.804876	0.040029	0.097185	0.076073
ENSG00000086102	26.7345	27.5902	28.0748	29.3778	30.8336	49.0606	46.2943	44.2113	56.5454	58.538	57.6956	42.3578	39.7554	33.178	36.7167	41.3807	42.6855	49.4905	53.6578	44.3329	41.494	48.1115	45.0506	44.4207	45.6509	42.1257	37.8002	41.5945	42.0622
ENSG00000062194	80.1193	71.6172	67.5248	73.4126	80.5771	92.0503	83.0579	136.478	106.698	111.016	109.751	177.379	112.331	138.037	115.029	113.537	140.383	112.545	94.3726	126.194	67.8465	68.8373	97.7642	57.4451	59.524	42.9825	57.5512	52.013	50.9186
ENSG00000106261	28.1289	25.5968	30.525	29.8599	16.2291	28.2912	29.4995	29.7162	28.927	58.3722	40.003	43.9109	42.3426	29.8783	30.2371	8.26835	28.7803	23.5078	23.8481	29.219	25.1671	26.7681	30.977	23.4913	6.68213	21.07	29.4991	26.7166	29.1123
ENSG00000164631	15.122	12.8741	7.53586	7.74896	7.78264	15.5314	15.8009	17.9363	14.5412	23.8256	19.9675	36.7166	23.3209	40.0485	27.0987	28.6856	38.9592	27.4913	28.8721	32.4609	13.4968	15.4331	27.9221	20.4375	22.563	15.5541	19.0028	14.5123	20.2227
ENSG00000123268	32.0785	26.8642	25.8722	23.3739	20.2181	20.2833	21.3912	43.1242	32.0434	56.6084	38.0459	51.7959	35.2812	51.0412	34.0391	43.29	52.1189	39.6989	43.9555	58.3456	39.1376	40.7699	50.3982	29.1824	36.9765	20.8936	31.2971	28.9357	30.7473
ENSG00000136630	13.0757	12.9275	10.2845	11.1408	4.96229	10.5567	15.0139	23.2686	17.3416	18.1625	15.8714	11.5185	12.0174	10.5944	10.4598	14.7402	14.2755	29.6086	27.3166	24.1127	20.0719	23.2882	21.3085	10.98	12.9067	7.36759	15.4042	12.7916	17.999
ENSG00000215271	2.92429	3.71418	4.69451	5.11293	1.85215	1.2085	1.83106	1.68163	2.7781	5.82748	9.23795	19.7636	20.1718	12.5955	9.63399	7.85145	7.964	11.8385	11.0165	13.4396	11.0115	9.14474	12.5939	15.6558	14.3402	13.8093	13.2011	12.8155	15.9765
ENSG00000127124	13.2091	11.431	12.0633	10.2463	9.51778	10.4728	10.8142	9.3613	13.2656	10.8282	20.6859	22.6917	42.2066	28.5373	43.8547	9.9861	14.1463	11.4303	11.8792	6.47271	11.4712	13.4172	6.7386	12.2778	10.7893	11.7324	5.40087	6.39558	3.78908
ENSG00000197619	3.00637	7.48909	5.53561	5.1154	6.89516	1.80084	2.80231	2.56928	1.59977	2.87231	5.76867	9.36056	8.3773	7.48905	7.64563	7.54121	11.5248	15.482	17.8902	20.9928	6.91769	7.34171	11.0704	5.72599	6.4425	6.58428	11.7357	10.855	3.07526
ENSG00000177946	4.45458	5.93259	6.31001	5.03649	3.68926	1.59346	1.51139	0.858201	1.68241	4.31805	9.30452	14.423	17.9862	19.4658	22.597	21.0965	19.6696	19.5433	18.2068	19.6899	10.2599	8.7723	9.50655	7.33466	8.89878	5.65885	10.8246	13.3438	11.8409
ENSG00000204644	2.29982	3.28098	1.9662	2.89484	1.28103	0.56581	0.146832	0.105465	0.621367	1.08736	1.29482	7.63236	9.32448	11.3972	11.4189	10.7371	10.886	8.48692	10.103	9.5755	11.1272	11.8989	11.0433	10.8983	12.9761	11.4181	5.32023	7.84033	8.38614
ENSG00000256294	1.91677	2.23705	2.20286	2.87946	2.14752	0.710585	0.165006	0.442136	1.05543	1.32059	1.6019	5.79385	6.97806	11.4413	10.7288	12.7915	15.6934	10.1686	8.96645	12.6058	7.68965	8.57168	11.0456	9.56379	9.35132	9.52217	8.98622	8.90288	7.4425
ENSG00000186416	8.71219	8.65852	7.32405	6.7719	6.9583	3.14024	2.79335	5.68849	5.08473	9.1379	9.37568	23.6825	16.9915	23.7544	16.633	19.2552	21.6815	22.2679	19.9072	21.9156	15.7475	14.6501	21.4451	16.7444	17.7085	13.7276	13.6985	13.6086	12.4663
ENSG00000167635	47.827	40.7821	45.4312	41.0547	25.2553	25.0385	25.42	35.0266	18.4911	41.6694	42.5615	105.067	100.129	111.736	91.119	101.331	120.06	107.831	107.468	113.222	83.8608	83.7413	97.5225	62.7829	73.343	44.1925	49.0894	46.8644	44.488
ENSG00000186812	13.7419	12.6056	15.4361	14.5157	7.20653	18.6869	25.9344	20.0315	20.0948	28.9416	10.1876	28.0987	27.7598	25.7287	20.1832	20.3281	23.0724	26.3457	27.3815	41.3647	19.1765	17.1162	26.7913	16.0825	18.2755	14.7004	18.4286	19.3634	18.3368
ENSG00000197362	3.72319	3.60312	3.99292	3.52269	1.67665	0.932601	0.691063	1.09039	1.03849	1.35155	5.05017	6.72372	14.4292	10.7295	17.7907	11.2512	11.8097	16.5975	8.63379	8.05304	6.58626	7.72032	6.25413	9.5038	7.16669	7.12673	6.18034	6.54714	8.22101
ENSG00000166261	6.9969	8.29609	10.0389	6.10313	7.38339	3.35422	3.51762	4.28155	2.77504	6.96755	14.3126	22.6534	19.5206	23.4649	25.8755	30.9922	23.9581	29.7494	23.913	28.623	14.1894	15.9035	12.3254	16.7973	21.6814	11.6209	10.4673	10.8814	10.5562
ENSG00000167981	6.92429	5.37341	4.54225	6.38625	4.58417	3.80805	4.65186	4.52428	3.69587	8.95069	7.786	11.6583	12.1151	10.0409	10.1215	9.25566	11.0319	7.96101	8.74173	8.49285	5.45212	5.33279	7.68812	7.11957	8.33221	6.09603	6.59724	7.26311	6.08174
ENSG00000118620	24.4676	17.882	11.9514	12.0989	20.1683	16.9809	13.7931	19.2234	10.5677	26.5946	20.3311	47.49	38.4795	66.9272	42.2181	29.1204	61.2669	19.2162	18.8492	23.4047	20.0494	19.26	24.1496	22.9534	27.997	16.6229	23.3788	21.5161	27.2222
ENSG00000147488	0.171039	0.17601	0.243034	0.018415	0.04841	0.514948	0.131637	0.196422	0.307557	0.160114	0.170982	0.739417	0.454283	0.768515	0.089572	0.172522	0.869749	2.95777	2.74715	2.33553	4.67758	4.77388	4.17304	6.53999	8.44573	7.49024	6.14025	7.96644	12.9611
ENSG00000198538	4.68689	3.39811	5.14679	3.3045	2.41393	2.95652	2.00858	4.0908	2.46949	6.53965	8.17928	31.3956	24.8651	35.4623	29.0959	47.8716	60.9336	17.4287	30.2977	16.5534	29.2476	22.6155	28.5578	37.2672	14.6151	26.958	22.8963	23.7729	22.2355
ENSG00000198040	3.81031	2.93827	2.90941	3.36596	0	1.87718	1.56953	0.04127	1.96586	4.59801	7.07199	13.6598	15.1185	4.74891	8.78851	7.74084	7.55329	7.52466	8.69522	4.65759	6.71438	5.60661	8.99616	8.23313	9.54292	4.12659	10.6754	8.76981	9.78652
ENSG00000263002	3.02438	2.48562	2.26713	2.34998	1.69167	0.613093	0.54659	1.24914	1.34242	1.7754	3.96917	8.07598	12.0343	14.7292	16.3604	16.3009	21.5568	14.7946	17.1222	19.2398	9.41587	9.24706	17.0903	13.2522	15.8994	10.1545	11.2295	11.0382	9.34566
ENSG00000116731	52.866	39.0697	19.8315	41.9345	59.2879	23.1632	30.8712	33.2408	61.9097	28.8974	68.2855	70.3741	72.0655	50.7432	53.2165	50.8453	62.0821	37.4663	35.5347	26.3553	10.8005	25.6863	27.4011	22.3836	27.5486	18.5937	26.3617	29.1447	11.071
ENSG00000147118	8.26662	8.44421	8.59473	7.77177	7.3995	4.73613	4.91816	6.79942	4.57019	9.75694	10.4065	18.2355	16.7616	28.4848	21.1112	25.9013	10.0436	18.2326	19.5219	25.7053	10.7755	12.4466	15.9975	11.8685	12.1847	7.58188	8.43794	9.12165	7.60241
ENSG00000156127	10.579	11.4423	11.5752	9.99305	10.637	5.57348	5.80324	3.7769	5.08746	10.3937	11.0697	20.9974	27.1625	34.4092	60.3879	48.2375	40.176	20.2068	11.8463	15.4874	6.67102	6.54424	6.55755	9.57898	8.23543	16.1431	8.00171	8.18049	6.86969
ENSG00000142528	3.90369	6.6228	3.23288	2.95075	3.20451	4.27531	2.83797	1.90989	1.53339	1.67046	3.43577	9.32035	10.5981	13.1068	11.0922	10.0392	13.4258	13.1416	10.9631	12.1627	5.96448	4.72041	11.9677	6.3924	6.76262	3.86771	4.67467	5.65933	5.65824
ENSG00000196387	3.1584	3.24644	4.61474	2.54583	2.11304	2.78109	2.89064	2.72476	2.09769	3.07444	2.78449	5.99299	14.2455	10.6454	10.001	9.17	4.21788	4.44052	4.4915	2.85401	4.98114	5.68424	8.94158	5.70881	1.41274	7.45947	3.81766	4.9144	4.01332
ENSG00000057657	19.8103	18.7201	5.05724	5.41784	32.7908	29.9074	30.6018	16.9124	25.6531	21.4115	27.8265	35.6564	51.0035	48.3535	51.709	51.7974	55.4678	43.7477	38.6554	38.7269	22.9176	24.4479	16.0023	9.46212	8.61704	6.19644	15.8994	16.6397	12.7554
ENSG00000167625	4.73725	5.29929	5.08443	5.30129	5.39015	2.88841	2.81663	1.9716	3.12386	4.99649	6.70906	7.57329	8.43505	13.2759	18.9398	17.1506	15.5413	16.3601	16.8961	11.2887	9.39176	8.17588	11.8537	10.1478	11.1346	13.1457	8.03141	9.73947	9.62676
ENSG00000104221	7.06341	8.17079	8.99174	7.4587	8.13102	1.4239	2.07016	2.03982	1.54506	2.505	4.8904	8.14181	9.99045	22.8761	32.9683	29.2456	32.9146	13.7642	13.547	13.0211	8.35942	9.28795	11.0112	9.03962	9.61576	11.9951	8.56847	10.2959	8.01373
ENSG00000126351	18.0687	17.9803	14.7938	13.889	15.1021	17.8073	19.0944	7.22954	6.44904	6.31352	6.3693	26.3883	24.0295	72.4403	99.7264	57.4745	59.2549	37.2363	38.5921	30.2736	68.1032	67.1467	48.1584	86.4062	72.9831	68.8183	72.9622	81.2145	77.31
ENSG00000178175	2.38838	2.03237	1.83977	1.54462	0.911307	0.767134	0.512206	0.173103	0.225303	1.29607	0.863634	2.70529	3.63748	8.90264	12.136	20.4851	18.2692	48.251	48.2041	47.1677	49.3131	51.3859	47.0036	64.1143	61.024	57.3265	30.6238	28.3614	38.0961
ENSG00000124444	3.02335	4.69411	2.30179	2.29017	6.14969	1.87924	2.26352	2.2176	1.48869	3.18483	5.38625	5.4889	9.35402	10.9287	16.4494	10.205	13.2931	11.4534	10.7966	8.57628	9.63578	7.28292	7.11785	8.96355	8.66313	8.9578	5.59795	7.15513	7.62414
ENSG00000167637	3.7713	4.00283	3.96224	4.74387	3.21866	1.66048	0.62627	0.835512	0.472527	0.723011	1.01336	4.91043	6.35467	12.0582	8.2743	10.716	15.8014	11.7674	9.59704	13.2493	7.18856	7.35555	8.56514	5.19689	6.6995	5.39706	6.62832	5.00983	6.93799
ENSG00000204604	14.9463	13.8405	9.74846	10.1447	7.16699	6.99956	7.6564	6.48299	5.82353	3.21795	10.534	2.75577	25.8783	38.0113	41.3085	35.4336	18.8336	8.19324	31.4749	16.3346	28.5173	9.88128	11.509	13.5473	23.1492	9.3532	9.22036	24.0316	10.6163
ENSG00000056277	3.53464	2.86908	2.92506	2.67878	2.53628	1.69512	1.18644	1.39436	0.993136	2.94344	2.41659	7.67651	4.59055	9.03911	6.79765	7.09406	13.5107	4.9463	4.55743	5.78778	4.03733	3.24024	4.46359	3.75109	4.42184	2.92741	3.52928	3.99906	2.26535
ENSG00000185669	7.69661	4.78481	9.58714	10.5301	4.45692	2.11785	1.47348	1.43836	3.47571	2.53624	9.41777	8.48205	22.6633	17.677	27.6565	22.7519	15.3619	66.4392	70.6636	48.2993	88.2978	89.2135	79.0252	97.5142	107.71	96.6858	25.9386	16.7739	25.4787
ENSG00000204611	2.04568	1.9343	3.30054	3.59784	1.65786	0.622804	0.442518	0.603008	0.498409	1.12139	1.77379	3.72834	4.37952	6.65554	8.97137	7.61691	9.29791	13.4468	11.6933	11.7737	11.5792	11.9279	15.2817	16.5209	15.9244	17.0711	13.7589	16.9508	16.8317
ENSG00000170903	12.1717	9.95125	9.39379	12.332	11.4883	9.45581	8.49129	6.66873	7.36738	6.93886	9.90788	20.8538	18.9737	28.7375	22.9255	40.2664	39.2956	35.7533	33.5887	31.0378	19.2787	20.285	23.2544	16.6637	20.9119	16.4793	19.6484	18.21	17.141
ENSG00000171604	36.384	22.2338	29.7922	25.9784	26.4228	43.6418	27.2055	11.2881	12.8097	15.0133	45.8879	39.7457	60.2301	50.0193	77.0508	56.9176	69.3856	104.89	119.302	74.7865	118.169	139.194	101.552	138.962	160.732	130.404	129.958	127.627	147.842
ENSG00000198105	4.23845	2.35933	3.55512	4.07306	0.653705	0.536818	0.438204	0.77068	0.205148	0.533237	0.365815	0.875437	0.850502	1.3843	3.05186	2.51008	3.68145	6.70815	6.87418	15.9753	5.23053	5.44646	13.1636	8.35859	7.82538	3.22117	5.51579	6.28256	10.1802
ENSG00000196418	18.6166	14.9728	10.0196	8.33817	18.8006	16.9246	13.8804	13.3027	15.4647	8.67919	10.9502	19.4844	14.3774	30.6876	26.6293	33.6407	34.5835	44.1796	43.6667	64.1689	46.2616	45.7232	90.9537	66.1375	69.5246	44.4487	40.8065	35.8838	47.9121
ENSG00000165804	3.66033	2.76774	5.16617	5.70231	1.97451	3.74151	2.41554	2.18024	2.01505	2.18519	1.50413	1.46768	1.45976	0.928627	0.620492	1.88725	2.6697	18.1204	11.6947	15.1049	20.8635	21.5766	15.9571	16.663	18.2509	10.1101	20.2144	6.62811	28.2224
ENSG00000169957	8.3335	5.42995	10.0544	15.3235	1.61399	2.0322	1.7353	0.944073	0.537094	0.859153	1.40866	5.25597	3.04741	7.59859	5.1239	19.9381	14.4464	47.0088	40.8958	23.364	29.6858	26.1301	18.5032	20.3947	19.0061	11.4299	14.0576	14.842	16.132
ENSG00000025434	5.43497	5.87573	7.03463	7.2017	5.68517	3.16708	3.58977	1.18531	1.22574	0.639835	1.04932	1.31761	1.21945	2.866	4.49966	4.58867	5.67337	18.0757	18.5183	23.2359	62.4901	67.6083	55.907	157.727	168.839	216.047	181.943	186.848	306.846
ENSG00000180346	3.1252	2.77278	3.37242	3.80819	2.67861	3.95533	3.8767	3.45864	4.60416	3.07022	1.97914	6.35549	2.77567	7.31164	5.11081	8.42902	7.34815	7.34145	8.67646	11.1515	11.749	12.2589	11.8216	9.09285	8.48628	4.82468	8.98765	9.51694	7.96204
ENSG00000105698	138.3	79.7153	149.767	155.737	74.7007	177.767	136.402	120.874	128.774	111.094	122.448	147.287	129.631	168.424	119.514	128.202	166.856	283.8	283.612	216.163	292.045	311.643	237.448	369.866	364.161	222.386	341.195	172.931	372.235
ENSG00000198715	36.9668	42.1076	49.4699	52.3236	36.9321	29.8196	33.3001	24.6771	28.2157	22.8206	30.7151	37.7094	53.9952	76.9365	98.9715	86.6179	92.6721	89.2994	77.3422	68.7946	73.4714	72.2472	64.0308	128.979	125.899	136.541	119.924	137.726	149.892
ENSG00000064961	50.42	33.5463	60.001	62.6085	35.8756	31.8865	31.6439	30.0599	19.3361	15.9311	11.2885	20.5092	20.3395	51.2128	40.6883	38.2908	60.8118	88.9032	84.6983	89.5908	137.416	134.004	121.738	172.899	180.384	134.107	125.415	72.7439	134.067
ENSG00000144485	0.925474	0.916195	1.5581	1.3786	0.873572	1.26316	1.19921	0.554683	1.43819	1.54386	0.808398	2.12055	0.757456	1.58713	0.461818	1.40223	1.50844	2.02705	1.88716	2.87195	3.59073	3.70052	3.47924	3.14728	7.31502	4.03635	8.5766	5.2658	18.3855
ENSG00000167555	4.34493	4.45274	3.69261	5.99565	2.13854	1.98591	1.70402	2.36973	1.08271	1.64337	0.627467	3.6785	2.72735	7.57249	5.96242	6.03178	6.32013	5.43189	6.16012	7.3672	6.22316	4.50292	6.89287	11.1309	10.0648	10.2541	11.7751	8.30599	11.1511
ENSG00000197928	1.89964	1.95647	2.01461	3.81918	3.10119	0.645119	2.19355	1.56253	0.281428	1.58088	0.640916	1.76016	1.2474	2.91416	1.58449	2.64791	4.36242	3.05455	3.00513	6.28317	8.21315	7.69187	7.94294	9.83027	8.55393	10.8071	11.0228	14.4991	11.2079
ENSG00000154655	2.3482	2.6197	2.02778	2.16196	2.54942	1.07351	1.18857	0.851755	0.590992	0.686544	0.644208	0.765097	0.15975	1.52802	0.903559	2.34199	2.7601	3.23613	2.1457	3.10192	3.33993	3.09829	2.79608	5.59791	5.67546	4.93716	7.34035	7.63093	10.0481

## Sheet: Table S4
Supplementary Table S4: 227 Down-regulated differentially expressed TFs.
	mono_1	mono_2	mono_3	mono_4	mono_5	h0_1	h0_2	h0_3	h0_4	h2_1	h2_2	h4_1	h4_2	h8_1	h8_2	h12_1	h12_2	d1_1	d1_2	d1_3	d2_1	d2_2	d2_3	d3_1	d3_2	d3_3	d4_1	d4_2	d7_1	gene_symbol$SYMBOL
ENSG00000163516	34.549	44.4794	46.2346	47.5149	28.5986	4.85889	4.31945	3.83472	3.42623	2.1095	2.58544	4.01086	4.57191	5.47147	11.1102	15.1296	14.0775	21.5865	19.1413	19.5091	15.2982	12.8765	14.1944	12.6066	13.3776	8.43852	10.7534	14.7345	12.8534	ANKZF1
ENSG00000141905	26.4598	19.9761	21.9465	24.1065	14.6592	10.6985	8.8305	3.25407	8.04358	2.58394	6.86542	4.2352	9.40283	9.16045	20.1434	26.9908	20.9522	42.8883	36.4851	31.1417	31.0281	21.6798	19.9777	18.7969	19.291	19.8171	30.4068	21.6959	24.9944	NFIC
ENSG00000160685	127.603	118.445	166.402	169.999	119.027	40.6286	31.4395	19.032	22.163	5.04341	6.69329	6.08544	9.66031	13.816	19.1722	36.9652	31.4325	141.561	134.028	97.013	84.8921	89.1451	84.9334	69.1187	66.5821	56.9403	46.4468	41.8997	53.3399	ZBTB7B
ENSG00000122085	45.6528	43.9703	25.5792	23.1827	38.6508	7.94036	7.46946	8.6317	7.73176	8.46446	7.27281	23.4449	30.5473	23.1861	30.6648	30.0852	32.1747	28.1931	29.8589	33.8252	25.2297	29.2943	29.2976	27.6226	29.581	23.0512	28.3755	28.9593	20.5122	MTERF4
ENSG00000221869	52.5278	11.1945	75.2829	78.9492	10.0492	9.53654	10.8351	6.13094	1.58155	0.986442	0.863479	1.3793	0.499314	3.68743	0.676824	0.604173	4.33805	4.73714	4.88939	6.69491	16.4655	15.4089	13.8099	11.4867	7.24824	0.968094	20.5891	3.88421	21.3902	CEBPD
ENSG00000121297	20.07	20.1793	19.0126	21.1361	12.5177	3.59768	2.83748	3.06219	1.9518	2.59546	5.45402	4.95904	5.19785	3.61806	3.75922	4.48558	4.3371	7.66188	8.68769	8.76094	5.61693	4.49388	7.69632	4.53289	4.64248	2.37402	4.33928	5.26247	4.36314	TSHZ3
ENSG00000104221	7.06341	8.17079	8.99174	7.4587	8.13102	1.4239	2.07016	2.03982	1.54506	2.505	4.8904	8.14181	9.99045	22.8761	32.9683	29.2456	32.9146	13.7642	13.547	13.0211	8.35942	9.28795	11.0112	9.03962	9.61576	11.9951	8.56847	10.2959	8.01373	BRF2
ENSG00000196705	24.5957	18.9688	15.2027	13.9028	15.0802	6.08446	2.94763	6.73439	7.39886	4.58129	4.57077	5.46194	7.44937	9.33893	7.80403	5.89727	7.6487	5.89784	6.9133	8.44942	9.44611	10.7829	3.65209	10.5185	12.873	7.20447	13.504	4.62022	12.3079	ZNF431
ENSG00000152804	48.018	35.2395	120.282	117.227	31.0811	6.28534	7.89239	7.20834	5.2755	2.81078	3.21972	2.19872	2.06721	8.02202	5.61225	11.0491	10.1064	9.87209	10.0084	22.3588	13.2303	12.3558	12.6191	12.3438	12.2115	12.3646	17.9641	16.3096	13.1505	HHEX
ENSG00000197037	17.3509	18.2651	15.8104	16.0466	20.5005	5.44116	3.72502	3.76509	3.35223	3.21807	2.36564	5.06073	8.42202	11.1952	10.7302	15.0891	13.5625	13.4421	19.6623	14.1376	10.8741	13.3137	9.20764	7.86106	8.50983	8.13821	9.9604	11.3311	9.5725	ZSCAN25
ENSG00000198455	12.5479	10.654	11.2917	11.9463	10.7127	2.70147	2.34741	2.58323	2.43161	2.17048	1.83421	3.74383	3.43903	5.23655	3.03008	7.21262	6.98401	5.65893	5.42957	5.95021	4.7188	4.33765	6.40226	4.82469	5.82344	4.25205	6.05125	5.39199	5.74444	ZXDB
ENSG00000105516	9.06301	8.23606	20.7016	17.4315	7.69969	3.87672	2.21036	1.83468	3.4471	0.220378	1.42084	0.449959	0.289365	0.603945	0.605845	1.59701	0.974028	4.60732	1.96705	3.23683	3.65251	2.64385	4.38037	2.8077	1.68682	1.48449	4.58326	5.1834	7.18904	DBP
ENSG00000188321	7.13293	10.2587	12.9303	12.0075	4.04869	1.69755	1.92194	1.08568	1.62565	2.45918	5.1677	6.28812	6.78759	11.9499	13.814	10.8347	32.5738	26.8063	29.9269	32.579	10.5817	7.34905	23.4948	6.86938	15.6681	8.64997	13.6323	10.7866	8.09573	ZNF559
ENSG00000088876	1.3963	1.43079	5.17483	5.84526	1.02201	0.115445	0.741521	0.191191	0	0.139492	0.649639	0.32806	0.746845	5.23877	5.91015	7.54574	7.29437	12.3307	10.0773	9.62559	5.35083	4.57691	7.54431	5.48253	5.48436	6.19571	3.90741	3.95312	4.11109	ZNF343
ENSG00000160007	28.3069	28.6108	24.1527	26.1379	22.5567	4.71342	4.3266	3.96366	4.04225	4.9307	6.74719	10.2579	11.3323	11.7585	8.65624	17.2238	15.6088	24.7094	23.715	19.8174	18.7863	18.1658	19.872	18.7094	19.3801	14.8951	21.2454	21.3662	24.141	ARHGAP35
ENSG00000185811	130.91	108.948	116.473	102.329	74.4509	28.3923	25.8438	13.8272	13.7651	14.3898	8.1138	11.1668	7.88331	15.9836	14.2697	36.5267	35.9346	49.5344	56.092	43.1082	101.876	95.6378	16.5265	85.2154	94.5314	58.0777	76.0106	79.1428	64.2644	IKZF1
ENSG00000184939	15.8689	13.6383	7.9726	11.7222	10.3977	2.89864	3.13448	2.81457	2.70323	2.66976	1.18524	2.54637	1.6693	4.32475	2.60879	6.3987	3.04512	13.8362	9.36264	16.3748	9.32534	15.2925	8.49056	10.3648	5.78481	4.62104	9.37032	11.3065	13.2738	ZFP90
ENSG00000170265	13.8131	10.3834	13.3928	13.6955	11.2496	4.06072	3.108	1.78092	2.2151	1.12645	2.9784	6.55948	7.99064	11.8758	11.0327	15.1491	14.4773	18.7418	20.8305	12.6668	13.5139	11.9836	16.0779	14.418	14.175	11.5505	11.2519	8.87533	14.0068	ZNF282
ENSG00000125945	4.71472	6.30219	6.26777	6.89238	4.73848	1.60835	1.32349	1.0259	0.685135	2.3795	3.28337	6.31037	4.87123	9.56059	7.68561	13.9184	16.3669	14.1899	12.9765	13.0085	5.14448	5.80337	9.58499	8.73553	7.92004	4.32516	5.92503	7.15919	6.73261	ZNF436
ENSG00000187626	4.13378	2.43553	4.55358	4.9971	3.85517	0.58193	1.01832	0.52755	0.855321	1.04539	1.16601	3.20294	2.70201	5.9279	6.70566	10.42	9.74461	10.251	7.65021	8.67177	5.33559	4.00519	6.58208	6.79349	6.5139	5.80682	5.25292	5.46121	6.04552	ZKSCAN4
ENSG00000204644	2.29982	3.28098	1.9662	2.89484	1.28103	0.56581	0.146832	0.105465	0.621367	1.08736	1.29482	7.63236	9.32448	11.3972	11.4189	10.7371	10.886	8.48692	10.103	9.5755	11.1272	11.8989	11.0433	10.8983	12.9761	11.4181	5.32023	7.84033	8.38614	ZFP57
ENSG00000128000	6.24047	6.70246	7.92668	8.44668	2.9178	0.910873	0.692401	2.54361	1.12948	2.58609	1.15386	4.86864	4.44398	10.1987	9.54271	7.34375	16.8124	11.4362	12.5284	16.9713	9.40635	6.124	11.4991	9.31854	9.49656	6.26918	10.0614	6.27334	7.34805	ZNF780B
ENSG00000197024	10.0815	11.5143	7.11806	6.8148	9.29629	1.76189	2.0438	1.63013	1.11432	2.90246	7.2838	7.73289	16.5256	10.7759	20.239	15.5622	12.0996	12.8288	13.7964	8.82982	10.9416	10.4707	9.38235	13.5185	13.4622	11.2256	6.65562	9.82846	7.2983	ZNF398
ENSG00000121864	50.7404	49.6177	27.089	32.7254	28.4629	6.87714	3.47615	2.99789	2.92103	3.20608	3.47219	9.44548	6.33879	12.1324	7.92844	13.6218	22.2175	29.692	27.7667	27.5989	31.1063	30.9137	36.2722	25.9931	26.0908	21.9833	29.5448	31.6459	31.0546	ZNF639
ENSG00000125347	341.184	296.128	180.354	188.832	291.007	68.7737	61.6803	42.8294	48.6991	54.6427	135.099	141.491	258.883	252.154	273.016	178.91	161.189	96.8133	94.3428	107.479	41.8605	39.3309	58.4836	26.7429	27.8816	23.1251	20.3731	17.27	16.4947	IRF1
ENSG00000124766	18.8154	16.899	15.6552	15.0343	14.5333	3.64526	3.93664	3.11384	2.90993	2.61714	3.13363	0.878725	1.21906	1.80495	1.07934	3.05363	3.73889	4.00759	4.61355	5.07051	7.08582	7.26708	7.56202	6.54481	7.52496	6.71332	7.69627	5.55089	13.2106	SOX4
ENSG00000020256	5.85088	5.81938	7.38937	7.66191	4.7961	1.63818	1.74762	1.25025	1.03861	0.350492	0.438902	0.601124	0.297042	2.16755	2.3804	4.97757	5.02085	6.85849	7.75029	7.54359	11.0687	10.5315	9.76377	10.9061	9.02946	9.83051	9.00195	8.26205	9.81762	ZFP64
ENSG00000267680	39.6733	35.1451	28.057	33.9687	30.7194	4.68469	4.55931	3.26515	6.32909	2.87289	10.5961	13.7826	26.3583	33.0359	37.4969	36.8531	42.5458	33.6911	30.7228	37.4659	23.4006	20.9681	31.0922	28.8039	32.9351	27.3934	29.5105	26.2316	30.4061	ZNF224
ENSG00000166860	8.44466	10.547	9.40124	9.36806	8.55867	0.841496	0.808255	0.710851	0.631938	1.05896	1.42904	2.32345	2.81419	3.89355	5.252	7.03137	8.1848	10.7904	10.2377	9.89204	6.02639	6.38499	6.54471	4.90676	4.98864	5.05321	5.20159	5.27175	4.67883	ZBTB39
ENSG00000196453	6.32037	6.93334	7.91591	8.74956	5.1167	1.43465	1.04723	0.677557	0.770076	0.887373	1.70852	1.85955	2.92218	3.68	3.48485	7.16119	4.78286	9.76851	10.115	7.76708	10.6745	10.9434	8.56016	9.28461	9.54188	6.89416	7.07017	8.41392	10.1597	ZNF777
ENSG00000170345	3866.88	4028.82	4992.33	4990.17	4694.8	374.838	429.728	270.366	414.862	66.2214	49.3086	42.7334	26.101	51.72	24.1121	41.8042	33.7435	73.852	76.014	94.0949	158.559	171.719	88.1307	90.5372	91.137	39.4706	202.95	127.577	243.262	FOS
ENSG00000171163	15.3175	14.0116	19.364	18.5617	11.9214	3.18659	1.96566	2.16438	1.74135	1.32414	0.395556	5.20564	8.69595	19.762	22.0626	25.6979	26.5446	22.8862	22.383	23.829	14.3936	13.655	16.056	11.5911	13.9201	10.5242	8.15995	9.16027	12.3171	ZNF692
ENSG00000167384	8.25445	8.35137	7.04411	4.02484	6.51637	1.36145	1.24774	1.08283	1.01393	1.40482	2.18123	3.44957	4.13729	8.60917	5.55101	6.95637	11.5775	12.3389	9.97262	13.7479	6.87622	6.64954	11.6382	9.29479	10.2867	5.79789	10.9218	4.83704	9.07146	ZNF180
ENSG00000085644	5.48152	5.86925	11.676	11.0327	2.01481	1.79604	2.38513	1.33223	1.00789	2.5883	1.52224	3.62897	3.34682	7.26005	6.13405	6.42869	8.65122	9.81007	11.6426	10.9208	11.3886	8.24088	9.86426	4.36248	9.85224	5.5256	6.15212	4.34737	6.32037	ZNF213
ENSG00000166188	12.1737	12.127	14.6887	15.7201	8.9466	2.014	2.10069	1.85924	2.46516	1.89965	3.25473	3.0069	2.58407	3.02318	3.41489	5.74904	4.50532	7.62815	8.79464	7.52928	8.56263	8.1809	8.48953	8.39833	7.83685	7.57757	6.63091	5.18698	7.62643	ZNF319
ENSG00000139651	20.6931	21.8682	24.5287	24.2457	26.7214	5.34657	6.29115	3.90226	5.15522	4.86406	7.99523	13.0731	22.3456	26.0927	27.7255	35.6257	34.3146	32.1258	31.3108	29.6409	20.2017	16.7944	23.5294	17.1077	21.1418	17.8285	18.9042	19.1638	18.0754	ZNF740
ENSG00000168286	29.0162	28.6183	34.9566	35.0374	22.4037	4.36687	3.64939	3.04942	3.50963	2.72666	8.49081	9.55039	10.0302	18.7943	19.992	29.3991	25.4877	34.5019	32.3772	28.8318	18.0181	21.4599	25.2019	17.598	15.9379	15.1294	14.4394	17.4751	16.779	THAP11
ENSG00000160094	24.8353	21.5434	34.6424	31.775	21.534	6.18068	5.53192	5.00948	4.15784	0.795302	0.983924	1.35539	0.351171	1.25299	0.713692	4.25181	3.68856	10.8028	9.62464	12.7693	21.3311	20.4527	18.4222	22.9383	21.2901	19.3674	18.4976	15.2006	23.4246	ZNF362
ENSG00000169955	5.94442	5.01071	10.5013	7.86266	4.56036	1.85769	1.36093	1.19967	0.759589	0	0.853435	3.12677	3.18027	4.0213	2.64816	3.8011	6.40788	11.7123	10.9916	10.2888	9.27567	9.32959	9.58062	7.93716	7.62337	5.49194	6.63565	5.57278	5.72179	ZNF747
ENSG00000198081	31.0443	20.3461	30.1116	24.0413	23.989	7.13733	7.65253	3.57476	2.66514	2.89242	1.99331	2.70907	1.85545	5.87294	3.77314	11.6859	11.9062	22.2685	13.4695	29.8031	22.9039	20.9558	19.7299	15.0839	19.8824	15.2257	29.0634	19.8878	14.8349	ZBTB14
ENSG00000175213	5.48816	8.33725	12.4367	14.9114	6.5713	1.72719	1.23042	1.70883	2.17619	3.01638	7.44908	8.5649	10.1366	9.90264	12.5098	20.4521	12.521	14.6665	14.5652	9.85602	9.13116	9.07117	8.22953	8.58792	7.1907	7.2835	6.3982	5.12792	5.4547	ZNF408
ENSG00000249709	9.82438	10.2195	7.61888	6.69259	9.30853	1.90221	0.999181	1.26805	0.084079	1.74751	1.46463	5.01013	3.0358	7.18116	6.80627	8.43053	11.3966	13.0117	13.7788	17.0383	13.2066	14.3655	13.7212	9.82169	8.88254	7.47558	12.1118	12.4554	11.751	ZNF564
ENSG00000100105	21.2577	20.5324	19.2206	21.5279	21.3488	5.27499	4.73866	4.05786	2.11509	2.4632	2.65205	2.87699	4.63108	7.8524	8.25529	11.0591	9.69914	12.5264	13.6274	12.0725	14.132	12.3504	9.8757	10.507	10.2271	10.6045	10.6199	10.5448	10.181	PATZ1
ENSG00000170581	203.2	223.83	218.59	226.317	171.857	40.2107	39.7917	31.1431	32.3539	14.9375	24.872	21.2272	61.5952	79.9528	158.31	166.13	158.066	140.021	137.951	156.371	121.354	120.99	121.706	114.873	114.459	109.92	103.112	112.356	120.34	STAT2
ENSG00000186448	9.44784	6.70749	10.8016	8.83749	8.04596	3.37648	2.56286	1.65192	1.1282	2.41194	1.66953	4.54503	6.08326	11.9126	11.6698	14.8891	15.9778	15.056	17.9307	23.157	13.0576	12.891	17.4416	11.0954	14.3153	10.0937	12.1179	12.0595	13.34	ZNF197
ENSG00000126464	14.8936	11.1276	14.8787	16.1645	5.36583	2.49615	2.62729	1.94077	1.39882	1.67281	1.15135	2.08316	1.82176	5.4301	4.06862	9.07478	10.663	14.8515	15.8466	12.2603	12.6878	10.8661	12.3071	9.05165	8.8866	6.42051	7.82016	5.20997	8.80156	PRR12
ENSG00000135148	71.7521	88.895	84.2195	79.6216	69.4757	18.2837	17.1736	11.2478	10.794	19.7525	22.1299	41.2223	58.1197	95.7335	148.873	121.971	139.668	88.6172	84.4085	79.6663	77.0088	70.7183	65.0379	55.6808	55.8332	50.7373	45.9602	60.1129	42.7756	TRAFD1
ENSG00000169957	8.3335	5.42995	10.0544	15.3235	1.61399	2.0322	1.7353	0.944073	0.537094	0.859153	1.40866	5.25597	3.04741	7.59859	5.1239	19.9381	14.4464	47.0088	40.8958	23.364	29.6858	26.1301	18.5032	20.3947	19.0061	11.4299	14.0576	14.842	16.132	ZNF768
ENSG00000151500	20.7062	30.6597	25.1395	30.8987	15.9689	7.64619	8.28759	4.40149	5.1136	1.6744	1.56439	2.46893	3.96958	7.51709	9.46662	13.9863	11.5167	27.6743	28.5489	23.2492	25.7833	24.8208	19.9845	19.0075	14.0285	17.0529	18.8482	18.5853	14.0433	THYN1
ENSG00000065970	45.9317	47.3293	36.7786	37.012	39.5881	12.8364	13.3295	7.95442	6.23867	4.77753	7.25262	5.86834	5.54325	10.8818	10.6262	20.1253	19.839	27.2189	27.5648	27.7621	19.9646	19.8808	26.1928	22.4559	23.5386	17.0016	19.041	18.3384	24.1167	FOXJ2
ENSG00000164916	28.5877	25.2714	25.5978	28.5776	13.624	9.18864	12.0497	4.68107	7.47198	3.27248	5.27052	9.68428	12.5248	19.6692	17.3649	24.7428	22.1499	24.3296	24.0072	22.6675	21.5559	20.5354	24.0757	21.1579	20.4645	17.7382	17.4541	15.4941	16.4206	FOXK1
ENSG00000143390	106.954	103.699	92.3009	93.9407	65.3425	81.067	58.1141	57.0673	49.7573	12.3222	17.6759	4.97989	16.4227	13.8865	25.6258	27.021	20.201	38.4874	43.6841	42.1945	45.1172	46.6913	34.3034	25.5475	32.0445	27.1641	42.7211	55.2287	26.8465	RFX5
ENSG00000213347	10.5553	5.66118	16.0278	17.6303	4.78149	3.69821	3.17167	2.55522	3.76703	0.904968	2.27933	0.568036	1.97016	1.5653	4.09931	5.10419	2.82167	4.96046	5.75997	4.35848	3.42366	3.87417	2.81879	2.1741	2.16653	1.68048	2.41081	1.49811	2.71082	MXD3
ENSG00000028277	167.121	178.544	196.55	218.738	163.53	69.113	63.8481	43.3101	44.6943	20.3794	24.1202	25.8637	27.5859	16.8765	17.6929	21.3816	17.5114	11.939	13.0578	12.5174	5.15005	3.65388	5.90586	4.94953	4.26189	3.60428	16.7754	13.1473	10.2479	POU2F2
ENSG00000124496	32.9535	28.7438	24.8518	21.084	28.6669	13.9824	12.1544	8.43333	6.81178	2.1815	0.954482	2.93137	4.31557	4.9801	4.50826	4.93976	6.76342	11.9027	12.1223	12.1016	15.9668	16.1225	13.9215	15.6179	13.6652	12.4068	14.9536	15.3139	16.2652	TRERF1
ENSG00000204304	180.167	182.233	181.659	178.345	158.848	52.6171	53.327	38.2914	37.3128	20.2293	21.69	22.2649	30.2425	31.3004	30.227	33.2721	37.1637	59.6984	64.9788	61.088	47.0844	40.5815	50.4332	29.5982	29.0503	26.2999	38.5151	40.4668	37.6664	PBX2
ENSG00000111269	68.1935	58.2921	66.4917	66.1621	35.8549	32.8669	33.0257	24.4382	11.9162	13.4581	8.06819	9.2411	8.72564	24.411	16.6964	36.892	42.6957	73.3013	76.762	77.6199	73.5835	75.4703	82.7125	76.7011	82.8558	49.9348	109.205	113.525	107.574	CREBL2
ENSG00000148411	39.5298	35.0712	46.403	48.704	31.5415	14.9541	14.9008	6.52022	5.52293	1.47416	1.43646	1.3361	2.4039	2.29545	1.99501	4.40734	4.93154	6.46151	7.66899	8.02196	21.2108	20.884	15.5747	22.4291	22.4262	17.2363	24.3796	20.3112	27.4648	NACC2
ENSG00000184481	28.2726	30.2656	32.0441	31.0827	33.9792	11.9452	12.706	8.64039	9.889	2.99882	5.38959	3.78894	7.69869	13.0619	16.6932	21.1496	19.8066	29.3249	25.4526	27.3226	13.3224	14.6088	15.0749	12.5165	14.4096	13.4191	14.1651	13.1575	13.7883	FOXO4
ENSG00000154957	10.9123	14.1009	11.5835	8.85631	10.1608	4.06516	4.4831	4.56177	2.68827	2.28098	0.676276	2.53077	3.25773	3.36793	2.8493	4.99697	5.52899	8.66898	8.27672	11.4848	11.2246	10.9631	10.2032	10.4177	13.0356	11.5701	10.0542	13.289	9.55554	ZNF18
ENSG00000158773	96.8686	175.142	171.521	187.368	196.517	52.6965	51.1982	24.0325	34.3532	12.2771	19.7727	32.0151	62.1869	80.274	135.01	134.877	108.385	85.0707	121.36	96.1993	104.669	114.042	114.329	97.1689	105.35	106.977	69.2038	70.3413	83.4135	USF1
ENSG00000114853	10.9759	10.8815	10.9364	10.1989	9.19422	3.8699	3.89089	1.92112	2.86822	0.670676	1.08925	0.989361	2.02333	2.66165	2.85057	4.50564	3.65694	5.24962	6.82364	6.24278	7.89567	8.32307	8.1372	7.81972	7.54702	6.5545	6.59041	8.62158	8.10234	ZBTB47
ENSG00000164048	26.5279	26.2068	25.0687	24.7116	20.4993	9.0528	9.62934	5.82561	7.15364	5.26921	2.23011	2.8191	5.44854	7.34851	12.578	17.4997	17.5988	20.8462	21.2845	25.8983	23.4218	17.7019	20.955	40.4464	46.202	51.156	36.7511	37.5405	59.3329	ZNF589
ENSG00000099326	11.1567	9.56813	16.7264	17.833	7.08807	7.47579	6.31123	4.33932	4.04062	2.06807	2.48067	4.89733	5.17382	7.46548	6.47349	7.53408	9.63118	10.6813	9.69159	7.90855	8.36719	9.15066	9.34878	9.00211	9.54341	6.98354	12.8452	7.51959	11.1931	MZF1
ENSG00000072736	65.881	57.125	48.0781	50.0294	45.2043	23.1024	23.6666	16.4666	11.5619	8.98747	8.03302	13.8735	16.2984	32.9364	28.1843	37.3913	40.8763	48.5319	48.8407	54.0879	46.9725	45.8071	45.6342	47.6297	54.3577	38.1979	57.6637	53.0892	64.1813	NFATC3
ENSG00000074657	14.409	12.7563	8.92409	14.8885	10.5885	5.48456	6.04554	3.45967	3.85599	2.69764	2.35344	1.75329	3.38948	3.51253	5.39737	5.31293	5.29714	6.15277	4.63642	2.82827	6.00226	3.86791	4.36648	5.93273	5.4443	3.16074	5.60213	6.56001	5.3009	ZNF532
ENSG00000183779	50.2657	33.8557	41.4752	43.9331	36.3312	29.1511	31.3966	18.5631	14.0193	8.35193	6.70807	5.694	4.3799	5.73704	3.8879	2.81851	5.37756	3.80986	3.92454	2.47851	5.71997	5.27137	4.4536	8.7166	8.79824	5.09364	16.291	10.1841	22.7484	ZNF703
ENSG00000050344	21.5458	21.4203	23.34	25.5423	14.3384	7.39282	9.63227	6.14318	5.64798	3.2266	6.3617	3.51434	5.97751	2.74607	2.98576	4.60023	4.8158	8.42644	7.69545	11.2216	6.06333	5.22317	4.98556	2.95054	3.41269	3.01953	3.86052	3.83784	3.65374	NFE2L3
ENSG00000112561	52.3006	56.7794	66.3496	72.7784	42.2005	28.552	21.2837	13.5065	18.068	4.36644	7.45108	7.35865	9.36375	11.9108	15.4364	21.6831	16.3803	24.8683	29.1291	22.6372	28.7915	28.9421	25.0618	39.0133	39.2937	36.806	45.9243	40.999	59.4658	TFEB
ENSG00000196757	34.5666	30.3397	27.7464	28.5524	23.8821	12.8293	9.0388	10.158	7.15311	4.69015	3.96989	5.06602	5.37423	10.3202	6.25437	10.0112	14.9297	13.4898	14.4154	18.2847	16.3507	16.008	20.7873	14.9996	17.4123	16.338	18.9531	15.5104	19.1025	ZNF700
ENSG00000185219	10.7098	11.2094	11.0038	11.6369	9.74136	2.55431	3.04712	2.22808	1.77227	1.10796	1.43763	2.09826	2.48687	4.6186	4.25542	6.98497	7.7777	8.02694	8.45302	10.299	7.72823	8.41096	9.45525	6.834	6.29491	4.87106	6.30632	6.58211	5.77128	ZNF445
ENSG00000171295	8.7378	20.6472	14.2064	14.6376	20.9917	3.10322	2.14678	4.08083	2.05567	2.23325	1.90536	4.01903	7.9315	6.14415	11.6475	6.88766	8.4368	9.13463	11.2096	16.2136	6.86686	11.5367	14.2998	12.885	10.478	11.7378	11.6238	6.33617	13.1795	ZNF440
ENSG00000081189	119.986	102.527	121.626	122.112	64.8613	42.2936	53.8042	20.5646	29.5979	7.68965	10.4432	7.5433	6.43937	2.58406	3.39079	5.92994	6.79183	3.85751	5.85955	4.35319	7.79468	7.6868	3.77854	5.76969	11.3312	9.62441	13.6935	22.521	10.1274	MEF2C
ENSG00000106948	120.62	114.19	134.1	146.045	123.859	56.8832	68.277	29.7122	50.0204	17.7961	24.56	18.0582	19.4201	30.4517	36.0345	39.6899	37.4345	38.9938	40.4624	38.8677	39.0112	38.7152	42.3001	38.0794	38.3514	38.014	34.2863	28.1774	23.0062	AKNA
ENSG00000175727	79.8339	84.4801	76.4621	81.2221	68.8008	25.6726	25.2174	22.0879	19.8965	13.1509	18.6335	18.8498	28.2944	25.3107	32.2236	29.5831	29.5725	29.6382	26.8741	26.9155	21.0665	20.1038	22.3385	24.8935	24.5742	21.7896	22.3214	22.0105	25.7485	MLXIP
ENSG00000136936	26.698	23.0224	28.5266	23.3201	16.6479	13.0119	16.7228	12.7228	4.91732	5.14162	3.56688	5.41816	1.62503	5.86448	3.90921	6.17497	11.157	19.9607	16.0098	19.6724	19.5557	18.8131	18.4522	13.9975	17.0691	7.85379	19.889	14.7599	17.9465	XPA
ENSG00000128604	95.4581	88.6886	131.394	142.654	81.7433	32.5698	34.018	18.191	19.0301	12.2191	19.8114	18.7695	69.8741	49.6103	124.262	103.513	79.9555	151.175	148.402	120.285	127.478	119.348	99.5075	101.652	100.07	100.222	79.7634	82.4641	87.969	IRF5
ENSG00000146592	105.178	100.941	75.4726	70.9107	68.468	52.4967	51.5047	39.8237	21.9475	12.6437	5.02524	4.21691	4.35869	4.50245	1.79007	3.64053	5.7707	5.88949	5.359	5.18727	2.79653	2.69376	2.97254	2.04226	2.72683	1.5405	3.37636	4.78467	1.81531	CREB5
ENSG00000139793	37.9558	26.3746	18.7725	19.1429	25.4538	24.5396	17.8189	21.8705	12.1047	4.82808	2.90408	4.2192	1.93589	6.43976	8.69688	17.6996	19.4455	22.4271	23.398	45.8335	34.7493	18.196	35.0393	21.9838	25.1737	21.3333	20.2852	25.1344	17.1695	MBNL2
ENSG00000140044	73.9696	63.4569	66.1064	74.328	90.1618	40.8937	39.182	20.2258	22.6901	13.81	6.2201	4.46543	0.962244	11.666	7.87279	15.3183	12.5237	36.9375	36.0519	29.0925	34.2728	31.4241	48.0126	41.4816	36.4509	24.1239	41.7769	32.7012	31.0681	JDP2
ENSG00000143190	15.1336	12.4323	8.29067	4.12224	11.1226	4.43776	3.33909	6.40142	4.89322	1.67271	2.94116	8.21487	9.21939	22.195	15.49	17.5662	24.9741	16.2105	19.0658	13.6445	7.93583	4.20418	15.2555	12.5518	11.4543	10.1695	12.8446	10.6999	11.1897	POU2F1
ENSG00000025434	5.43497	5.87573	7.03463	7.2017	5.68517	3.16708	3.58977	1.18531	1.22574	0.639835	1.04932	1.31761	1.21945	2.866	4.49966	4.58867	5.67337	18.0757	18.5183	23.2359	62.4901	67.6083	55.907	157.727	168.839	216.047	181.943	186.848	306.846	NR1H3
ENSG00000118263	68.4783	70.4522	52.3627	54.6198	60.1101	36.3784	38.637	18.8793	16.4744	9.98055	5.14227	7.77274	8.42862	7.43481	4.12073	5.91317	5.39278	6.71478	9.03635	6.68825	13.7756	14.3355	14.4572	11.6457	12.5107	8.9576	16.8005	17.2343	11.9311	KLF7
ENSG00000123405	46.2256	56.9394	53.0499	52.0458	52.2099	15.9846	14.6411	9.39029	10.6315	4.09171	2.35329	1.61367	1.9677	0.686451	0.604672	0.496515	0.505792	0.43679	0.360401	0.48243	0.627634	0.175087	0.55276	0.31517	0.17256	0.100055	0.068429	0.083068	0	NFE2
ENSG00000198740	41.9592	32.7123	24.9752	28.7491	22.8759	7.82346	7.6328	7.06912	7.66093	3.06356	3.51512	1.96933	2.49723	3.10013	1.56965	3.04433	5.95408	5.50953	6.26252	7.30011	9.76137	10.1375	9.68781	7.34203	7.99973	5.24672	8.99587	8.82728	6.72536	ZNF652
ENSG00000123933	44.4107	40.1366	52.2244	54.1761	31.7656	15.7349	14.224	7.73947	7.53282	3.38255	3.77729	4.32725	4.49085	4.43008	3.00296	4.52488	4.32279	5.77957	5.49065	4.5593	6.82968	5.10563	4.8812	5.04848	5.18588	3.15037	9.63785	7.68579	12.0396	MXD4
ENSG00000187605	93.9271	88.3081	66.4598	67.7813	71.0125	41.8461	39.2509	37.8521	35.054	10.6485	14.8031	43.4892	58.9406	78.5694	60.1725	55.5845	56.1711	38.0748	40.0343	31.9048	32.3807	30.6342	31.9145	27.528	29.7251	21.885	29.2202	26.9807	26.6151	TET3
ENSG00000180357	49.9368	50.9982	40.463	45.6951	32.7121	15.4544	16.1147	11.4572	7.67483	4.61359	5.45754	11.8574	13.9518	15.114	13.3807	17.2122	17.3722	21.1836	21.2162	19.9594	20.3871	19.6972	21.7657	19.9387	20.7955	18.3001	16.4864	16.8898	18.3537	ZNF609
ENSG00000133250	17.4065	10.118	13.971	21.4273	7.39323	3.4534	2.90127	2.31701	3.1213	1.6845	3.72544	3.2154	2.51843	3.28416	1.58994	3.25483	3.39012	5.29322	4.18386	3.91538	7.01429	8.80304	6.14545	5.11501	6.97952	3.82982	7.13011	3.794	10.193	ZNF414
ENSG00000186376	12.4189	12.4946	12.9037	11.889	8.83189	3.44757	3.16737	2.58046	2.44257	1.16618	1.24272	1.23093	1.72524	3.57518	4.08589	5.14608	6.21198	7.19745	7.02776	8.27216	8.51401	7.478	8.78858	6.6702	6.54822	6.27951	8.01949	8.89406	8.10816	ZNF75D
ENSG00000197782	18.4713	15.2531	17.131	18.9709	11.1617	5.06344	5.35834	5.53315	3.42655	3.55789	1.92913	6.76484	7.82143	21.1369	18.5432	18.9473	33.8905	28.8535	23.6107	29.0753	14.34	13.984	24.1383	18.6183	17.4953	16.0536	9.74353	12.7943	12.4195	ZNF780A
ENSG00000137871	36.0629	30.7911	30.6341	32.5846	26.1351	9.06912	9.76905	8.47758	6.18099	3.93644	1.68916	3.1294	2.74768	8.68341	6.15729	10.713	14.8349	13.4468	14.0293	14.9323	15.5627	17.6143	13.6762	11.8401	12.6579	7.52274	13.943	14.9975	11.7147	ZNF280D
ENSG00000181444	68.3048	55.2739	101.115	117.481	38.7574	32.1454	38.2696	22.4077	19.6368	9.12406	6.12819	3.63078	3.00934	1.19457	0.083844	0.430889	0.652356	5.74928	5.10633	8.27489	8.22082	6.57186	11.0153	4.74891	4.87555	3.22363	4.25867	2.68498	5.82308	ZNF467
ENSG00000188994	37.0511	27.0779	15.9522	16.1753	24.9952	13.7845	13.4649	9.34204	7.43404	4.31882	4.21774	11.8504	8.52025	18.4422	9.05018	12.3752	18.9014	13.9882	14.5404	14.2675	14.3786	13.5108	14.9736	10.1921	11.8226	7.75167	13.5238	11.8218	11.8486	ZNF292
ENSG00000126003	64.135	66.6475	38.7408	39.2715	66.3587	14.5181	15.078	10.7683	10.6888	4.88865	9.12432	13.1676	20.1682	24.3467	23.517	30.7311	30.0669	24.3119	23.5219	22.7339	14.6821	15.759	18.1642	13.8569	16.2886	11.6569	11.8091	12.4956	13.3615	PLAGL2
ENSG00000130816	42.0189	44.2246	41.8757	40.6699	29.1791	15.2122	13.9671	11.4674	11.032	6.40635	7.72483	7.58928	12.3388	10.221	17.8224	30.0047	29.209	79.3023	83.9684	78.7954	85.5271	84.0477	76.0579	61.5154	61.2861	47.4017	58.8686	71.8044	56.2298	DNMT1
ENSG00000116990	48.4506	46.6282	79.8936	79.986	32.6599	14.7897	19.6073	15.9599	6.29922	3.90632	1.92135	6.05254	2.61123	6.52396	3.29162	8.39823	6.53251	6.52928	5.34448	9.30939	5.87667	4.13985	9.15989	4.13598	4.53034	2.84426	4.62496	5.38843	5.25125	MYCL
ENSG00000214022	42.3616	39.7212	59.7243	23.3183	3.86499	6.25364	16.8538	11.962	8.33212	3.44942	4.49521	11.2396	9.52566	10.315	23.3394	45.4198	54.6443	60.7831	63.7179	48.6635	36.3564	31.367	38.6832	21.2311	30.6168	29.3596	23.5136	18.4344	35.1261	REPIN1
ENSG00000076108	125.433	101.183	101.899	105.733	88.1272	54.603	42.2723	26.5604	39.6018	14.8021	22.2661	29.4984	39.1156	48.7174	46.3179	52.7249	58.1301	54.9418	67.1125	55.3543	43.4716	42.618	67.8505	40.156	51.6281	46.5321	30.1697	27.3825	41.1267	BAZ2A
ENSG00000120738	1171.5	1084.33	297.479	306.947	1480.79	1113.31	1049.15	677.792	836.635	124.413	60.2721	52.2212	29.9795	29.7939	10.7136	11.4627	9.761	2.17733	2.37114	1.82744	12.8934	13.1375	7.26185	11.6909	9.14481	3.65186	45.0041	43.2306	45.1564	EGR1
ENSG00000136826	427.168	352.839	795.257	788.216	224.1	431.986	393.941	209.495	188.554	97.11	67.5225	34.8842	25.7052	17.5653	8.81448	12.0725	8.92799	10.7527	12.1059	10.4632	26.2041	25.1291	14.854	9.50991	11.7366	4.86093	15.7115	11.7941	11.1326	KLF4
ENSG00000135899	127.071	119.135	107.853	118.395	71.8711	47.5292	39.786	31.0264	24.3173	19.0059	17.9106	19.2492	21.5678	40.8802	45.4589	46.9063	47.434	34.6035	33.6127	38.1311	28.4862	30.9153	26.155	29.4023	30.7388	24.4471	37.7053	36.9448	27.5743	SP110
ENSG00000151702	176.923	175.164	220.491	212.306	102.205	72.1152	71.2272	42.4802	30.3383	13.1777	8.79773	7.65167	5.92917	15.5713	11.0595	24.2958	23.3298	29.2902	32.3038	36.6462	59.5385	59.5898	60.2941	63.1695	63.2149	56.669	64.4162	71.7989	58.2152	FLI1
ENSG00000141510	36.815	38.8958	46.0483	49.2207	28.719	15.3368	15.6191	9.10386	13.8543	4.89012	9.16101	6.60792	13.8818	16.209	24.8196	51.7066	37.1236	78.4077	64.0789	74.0733	61.7511	60.0721	47.8248	54.3903	52.8609	53.775	48.5121	47.7695	29.4463	TP53
ENSG00000170365	7.97371	6.21242	9.11404	7.57653	5.99764	1.7281	3.58886	1.15616	0.594459	0.547226	2.84302	0.763076	1.72454	1.04559	1.73131	1.95091	1.01919	6.75303	8.2858	12.8166	15.3103	23.8714	21.1341	14.5604	18.6364	11.3154	11.3149	16.7688	14.7644	SMAD1
ENSG00000132024	21.5625	20.4877	25.8194	26.5945	16.0711	9.26184	9.79483	4.80642	6.57918	1.22331	1.47772	5.30555	6.44174	11.2185	13.1448	21.782	21.6153	31.57	28.4912	23.8947	25.3738	26.1728	23.1017	21.119	21.0702	22.6124	16.4704	13.8756	17.2259	CC2D1A
ENSG00000172059	102.388	105.854	93.8273	92.4461	109.214	36.0098	37.2598	15.418	16.7745	13.2589	12.3168	13.593	13.6255	21.7736	14.3737	30.374	26.9746	23.0177	22.5759	20.2645	27.7269	28.3479	25.7203	20.7689	21.1207	12.9787	36.7853	39.812	36.1043	KLF11
ENSG00000140396	56.6165	55.5717	39.1638	43.5399	51.598	44.516	42.2267	40.1141	26.8275	10.6095	6.94903	11.6656	9.66684	14.8941	13.4362	20.4683	23.8084	19.5061	19.8657	25.2051	20.1971	21.5213	25.0104	20.4475	21.7609	16.4437	26.0455	24.2713	25.4453	NCOA2
ENSG00000102901	46.3428	42.4323	54.3583	57.3107	37.848	18.1966	13.3547	12.2658	10.2607	4.40068	1.96172	5.03304	7.2894	10.5946	14.7737	15.2251	21.5729	24.7103	24.2206	23.3225	17.4524	17.8625	14.456	16.006	15.005	13.8837	18.463	13.3895	19.2443	CENPT
ENSG00000177873	7.03579	6.78527	5.71237	6.64912	5.09213	1.89962	1.70647	1.86158	1.17384	1.14887	0.537374	1.92675	1.66076	4.73053	6.09131	5.86661	7.78471	12.5445	11.5627	12.9644	6.60361	8.43267	10.9327	9.12833	8.38946	8.16297	6.50369	6.17552	5.68875	ZNF619
ENSG00000135365	69.6701	68.4691	55.6983	61.8729	54.4393	22.8214	26.573	17.6503	18.082	4.33933	3.43952	3.7085	2.12403	2.69771	2.33029	6.82812	5.76346	11.0713	15.4779	13.6624	8.92571	9.24667	11.9204	8.99686	8.83685	6.10369	10.4453	9.44042	10.188	PHF21A
ENSG00000140382	27.9638	27.772	28.2412	29.8319	26.1311	10.3451	11.2006	8.11163	6.13732	3.32901	5.41167	7.33689	6.14477	12.8636	16.8401	20.8312	22.8652	26.0658	25.8051	25.2772	26.5522	26.7388	25.3311	24.6557	22.6604	18.3823	26.7245	29.6706	27.4414	HMG20A
ENSG00000059122	22.45	24.6679	32.5866	31.1827	13.1037	16.3758	18.044	8.60628	11.1818	2.31635	5.10476	2.09411	1.92523	3.97365	3.12956	6.66932	9.47008	15.1954	15.0976	14.247	11.5445	10.9374	11.8203	12.3912	13.094	10.3234	10.718	7.36969	12.4212	FLYWCH1
ENSG00000196628	16.9411	12.1571	10.2582	15.0184	9.78958	6.03374	5.91409	4.68554	7.14581	2.15811	3.21824	1.25078	1.72068	0.60364	2.38377	0.900053	0.667264	3.24254	2.04129	2.50659	4.82149	3.7545	1.94183	2.87064	3.17348	1.42821	7.45749	8.28582	4.31256	TCF4
ENSG00000125740	336.621	347.559	636.25	688.087	288.838	1325.65	1193.48	608.431	874.094	213.803	175.345	51.6549	43.159	22.1271	11.8125	7.84701	5.40299	0.721413	1.29675	1.28149	1.23842	0.838608	0.259182	0.407181	0.319797	0.803129	0.478847	0.338058	0.564072	FOSB
ENSG00000104447	44.5063	35.5575	31.8769	60.1274	27.2181	19.8747	24.6399	22.9718	11.1815	22.8391	15.9601	7.88155	9.60533	8.51625	5.30035	5.58451	10.4314	5.33185	8.68822	7.53883	10.7284	10.7894	9.85921	8.97939	9.38045	4.29731	13.5519	14.006	10.8883	TRPS1
ENSG00000213676	98.0556	106.261	110.15	110.88	146.389	74.6633	71.5364	51.1767	52.1396	28.5989	26.2407	23.5577	37.2428	37.7268	42.1567	59.8782	50.3133	93.2282	103.859	93.7737	85.4955	76.6509	58.851	89.0584	64.6613	91.7432	84.2091	90.9132	65.161	ATF6B
ENSG00000257923	91.4467	90.5216	98.4141	94.6386	83.5684	92.9732	69.7153	51.1083	58.4031	33.833	34.4641	17.5869	21.902	15.7472	14.0641	19.213	18.4851	16.7078	29.4419	31.7922	33.8202	28.0949	31.7711	41.7583	37.3785	34.2515	38.3636	44.615	45.2519	CUX1
ENSG00000104903	31.7403	17.8197	56.6718	61.2574	5.68482	38.1244	31.1589	19.2284	13.8408	9.25124	7.12553	10.8367	3.05396	15.5518	6.65847	17.2102	21.5181	34.1909	28.7345	22.341	21.6611	19.0767	20.6976	19.4536	20.3125	8.16785	21.7866	9.21765	17.6393	LYL1
ENSG00000116017	31.151	27.0702	29.6199	31.9297	24.3043	45.3408	42.7212	19.4214	20.7641	7.69718	7.99835	4.57666	3.90405	5.5547	5.82695	8.42343	11.2287	18.7954	19.0185	20.412	18.4867	16.6828	15.935	11.8964	11.6549	9.19923	13.5466	9.48208	15.1815	ARID3A
ENSG00000174428	11.0625	12.0777	9.78592	13.8629	5.97177	6.64455	5.14633	2.9984	3.56934	2.3216	2.65878	2.50984	1.59214	2.40488	0.946489	2.30101	3.51435	2.52548	2.55222	2.59516	1.39644	0.580167	1.52983	1.37781	1.00723	1.06692	1.55855	1.58822	0.974749	GTF2IRD2B
ENSG00000109381	47.494	40.6978	25.835	28.033	37.8685	24.5182	12.9877	12.6762	12.7307	9.60049	10.6247	7.38155	7.60308	13.9726	9.91018	14.3231	13.1118	11.8981	14.6942	15.1007	12.3329	12.927	14.2169	10.2408	12.0898	10.5264	12.6986	12.49	10.5444	ELF2
ENSG00000122034	93.8162	85.1506	110.16	108.594	85.5692	46.2525	65.8513	39.406	38.3509	23.0947	14.2948	22.626	25.0598	48.5375	43.9251	60.6409	78.2698	140.113	132.684	169.694	159.464	150.08	152.642	150.441	148.208	120.628	140.758	125.619	134.241	GTF3A
ENSG00000169689	16.3853	25.6421	19.5995	19.8161	24.8889	13.157	13.0705	6.4753	9.66792	4.23344	7.00877	3.20132	2.45452	5.18635	11.0036	13.5244	7.96143	40.0887	22.8775	17.1603	24.3628	18.8562	11.7828	25.9437	10.3263	31.2584	16.2563	16.0222	22.0589	CENPX
ENSG00000165030	203.468	195.585	50.677	46.8985	172.733	277.569	289.144	248.326	206.142	78.8835	62.4041	35.0097	29.1782	27.9228	16.7896	27.5532	24.4614	29.8558	30.8723	33.4315	25.9032	25.917	24.3594	11.6382	12.7845	6.86166	17.3603	18.7631	12.4885	NFIL3
ENSG00000125520	16.4681	11.6952	19.4786	21.8732	7.84333	10.1206	9.81423	7.58279	7.34302	2.92431	3.55454	4.26837	2.31044	5.44443	1.64689	2.17835	3.36695	6.07287	6.31449	6.43845	7.31789	6.15939	7.611	6.5633	4.90418	4.37879	11.5995	6.47454	13.3418	SLC2A4RG
ENSG00000132846	6.55339	5.83246	6.44018	5.49413	5.8731	3.88166	3.41984	2.12075	1.41633	2.26984	1.29514	1.42647	1.29597	2.88876	2.79705	3.4042	4.349	4.90423	4.96996	8.49674	11.582	11.8691	12.649	15.1947	14.7047	17.1557	15.0677	16.0409	17.996	ZBED3
ENSG00000118418	111.336	119.997	111.056	97.7018	105.326	68.8765	71.0481	74.4062	58.7625	48.7293	30.0192	17.6908	12.2768	7.22171	8.35291	18.4822	17.2027	50.9136	46.2466	49.352	60.7109	62.4034	55.8342	51.497	51.036	57.7123	68.5378	70.0885	68.4906	HMGN3
ENSG00000179456	46.391	41.396	52.183	54.1851	47.9053	16.0461	16.4386	19.8616	15.9845	16.6372	15.0501	9.5238	8.77519	9.83572	7.74388	12.2635	11.7672	10.9085	11.8606	13.8801	6.52208	6.03707	9.19027	5.30811	5.81235	4.89486	9.04945	7.30402	7.9771	ZBTB18
ENSG00000127528	46.6736	29.8304	188.126	223.981	19.6606	25.3149	40.6393	50.7296	11.2227	31.0118	8.06945	21.179	3.28426	12.3583	2.98908	1.57064	5.54083	3.17262	2.52292	4.45922	9.7261	6.99377	9.68558	3.67436	5.81117	1.68133	2.49824	1.33803	2.12604	KLF2
ENSG00000125812	67.5748	58.7811	16.6937	18.7526	54.6015	105.688	113.154	66.3251	105.81	15.3185	12.9256	8.67552	7.92831	13.4737	8.98294	16.9783	16.8018	17.1586	17.5678	15.5235	13.1783	11.0051	15.1753	11.3878	10.5956	6.90233	14.1342	13.631	12.0317	GZF1
ENSG00000150907	33.9885	30.0182	26.3828	24.7839	34.8463	17.77	15.8628	10.8149	7.40885	7.5013	6.57397	5.64545	3.98426	3.98835	2.54141	3.68001	3.55615	4.05006	4.63907	6.16794	8.46284	8.57125	7.73863	7.5906	8.93673	5.33981	9.54748	8.72049	10.1525	FOXO1
ENSG00000154655	2.3482	2.6197	2.02778	2.16196	2.54942	1.07351	1.18857	0.851755	0.590992	0.686544	0.644208	0.765097	0.15975	1.52802	0.903559	2.34199	2.7601	3.23613	2.1457	3.10192	3.33993	3.09829	2.79608	5.59791	5.67546	4.93716	7.34035	7.63093	10.0481	L3MBTL4
ENSG00000171223	1010.76	688.816	1601.54	1605.18	249.797	918.689	1072.81	395.01	419.429	293.745	173.485	124.153	61.0915	100.194	49.2029	110.406	120.227	184.965	167.519	179.684	185.497	148.817	129.101	117.316	153.6	53.6557	128.853	64.376	180.088	JUNB
ENSG00000126561	81.9982	88.5463	89.1819	92.8917	94.6124	52.7481	51.3176	34.8107	46.6239	17.7369	24.7882	10.7159	27.822	24.019	33.7162	44.2265	32.7142	44.4067	35.844	52.7598	39.7379	36.0562	51.6599	64.1883	63.6035	50.5062	46.4927	63.2357	74.2813	STAT5A
ENSG00000139083	88.4152	83.4328	80.903	82.5838	73.5509	49.3774	42.4852	37.3944	45.3212	23.5756	25.1741	15.4706	17.6218	20.2789	17.8188	35.4534	32.0548	49.0156	51.4192	55.3406	62.2678	63.2565	43.9886	48.529	49.3754	35.4888	45.5656	46.734	42.5506	ETV6
ENSG00000119950	46.7425	50.0899	14.9857	15.3628	45.459	36.0272	34.7681	27.6789	26.8922	10.6093	5.81462	4.17109	4.24169	5.31577	5.91262	10.4205	11.3472	21.4001	19.9201	27.1555	23.6588	28.6805	30.5395	11.9411	32.4819	24.259	38.6597	32.1001	23.3658	MXI1
ENSG00000148737	22.0181	26.836	18.4826	22.6573	22.5452	21.3722	22.4837	22.3824	20.1332	11.9856	16.732	9.22214	9.55824	5.77935	6.90489	7.10479	5.60267	10.583	11.0636	6.46059	12.436	13.6853	7.50347	8.48014	7.36695	7.29865	6.90282	8.32224	5.26034	TCF7L2
ENSG00000059728	200.988	170.817	88.4397	86.2781	199.829	214.252	222.392	205.101	185.477	158.763	75.0362	48.024	29.1765	33.0454	20.4414	33.8554	45.9619	42.406	42.1099	51.8819	28.7132	30.5624	40.648	26.3038	26.9292	13.7733	30.2265	27.1647	33.4821	MXD1
ENSG00000140836	36.5443	31.7877	22.7908	23.9889	17.9443	25.0435	25.1142	19.7292	13.9082	23.633	10.7592	2.2138	8.65783	9.84344	8.67358	10.6462	10.8138	7.19493	7.82601	8.97413	9.19191	9.06198	9.69126	9.00704	8.26511	6.72574	14.5715	11.8346	14.3326	ZFHX3
ENSG00000198945	33.9412	31.1345	23.7791	23.1392	28.7192	15.833	17.2426	13.4409	9.3665	6.55404	5.0336	4.86589	6.05787	6.91855	4.7917	17.134	14.2351	15.9615	15.6077	18.896	8.00266	6.49198	8.08936	6.25613	5.09693	4.04091	6.24477	8.00422	6.28787	L3MBTL3
ENSG00000186918	38.8576	45.1705	42.8856	50.4279	33.5928	23.5293	25.167	8.60428	6.24041	9.65186	11.3165	4.31747	6.68382	4.04809	7.92557	4.00441	4.80046	8.18592	5.08894	6.3943	11.0967	16.416	14.3332	18.6552	17.0513	9.20057	28.2187	32.6942	26.8924	ZNF395
ENSG00000205189	29.9217	22.3172	10.6614	10.2885	13.2454	13.2706	11.7677	6.61494	8.61731	5.79643	5.99691	4.36833	3.03771	5.78305	2.79104	5.81852	7.84227	6.33995	6.80255	8.53473	6.97403	7.21295	6.9425	4.55147	4.659	3.46371	6.72107	5.41717	5.01399	ZBTB10
ENSG00000131116	11.7401	3.84266	21.5042	20.3454	6.45739	7.3633	7.65072	4.5923	1.69757	3.60759	1.58553	3.92009	1.07857	3.98938	3.6143	3.61397	6.55	11.8703	11.6559	12.3826	19.0859	16.6226	15.5356	19.0832	17.0225	7.78161	17.8343	5.76155	12.3301	ZNF428
ENSG00000173757	94.5453	102.264	96.1189	99.6165	72.9962	49.674	49.4594	40.682	32.7004	25.185	27.0659	20.8879	26.1822	25.8704	25.3779	33.0335	33.959	35.8209	33.4912	41.3289	39.2614	39.6898	40.8544	42.0254	44.0685	35.8868	49.7827	54.0175	54.5236	STAT5B
ENSG00000237765	28.2776	24.7723	23.5718	22.6821	24.1716	11.6175	11.3257	13.1331	11.4637	8.44621	5.69134	7.43953	2.05907	3.0842	3.98586	6.11624	6.85216	12.3286	9.09651	17.6351	13.5827	10.2884	17.5851	9.65661	9.68431	11.7626	9.01147	7.1836	9.08861	FAM200B
ENSG00000171425	33.9149	28.8736	42.0626	44.4806	20.4596	29.5465	30.9577	18.7822	24.3465	9.77085	12.3776	9.77621	5.22929	11.9085	10.1759	11.2344	11.6286	13.9813	15.313	10.0169	9.37546	5.88757	9.49581	9.20339	8.66333	8.04099	8.65384	9.18538	12.8111	ZNF581
ENSG00000166432	15.83	13.0038	10.4972	10.1385	5.37794	5.14574	4.97982	5.29398	3.05702	5.32157	2.05246	2.49041	2.06199	2.81554	1.11627	0.962257	2.0473	2.53311	1.90269	3.82063	4.13553	4.71269	3.64105	4.48988	4.72871	2.3189	6.64116	4.19643	4.3485	ZMAT1
ENSG00000053254	115.798	102.202	74.9339	84.2252	106.213	59.2785	55.917	47.9956	46.3068	35.0593	25.8525	19.4131	15.5836	16.9304	19.2101	21.7215	25.8501	45.7418	47.7309	47.931	44.4318	45.0275	51.9342	33.2013	40.5175	32.135	48.5731	51.0649	53.4153	FOXN3
ENSG00000119866	8.55392	7.19257	7.46664	6.66587	2.9402	4.35211	4.43781	5.40646	5.07419	4.79634	3.88338	2.62905	2.12983	0.722146	0.430932	0.670165	0.653199	0.990326	1.00524	1.39627	2.1732	1.52056	2.0471	4.43181	3.71077	2.16292	5.64827	4.55515	10.2023	BCL11A
ENSG00000169926	240.155	258.995	264.504	266.317	288.248	131.049	131.516	70.0068	65.3844	48.3161	76.0584	68.6963	89.1388	85.3191	70.2779	89.5536	74.6789	91.3092	89.2053	90.2902	83.2513	79.1554	81.3536	67.4258	69.9253	54.8072	72.9003	77.9247	72.2122	KLF13
ENSG00000196605	9.56914	9.64566	10.3157	8.5059	5.0528	2.41122	2.49996	1.27003	2.07201	4.13503	3.38428	6.18577	4.6592	4.03675	1.84923	3.97396	4.56282	4.70554	3.238	3.55706	7.57381	5.83397	9.29674	7.83847	9.53796	5.48731	10.8791	10.1253	9.71187	ZNF846
ENSG00000151650	27.5506	20.2084	23.4985	25.2245	18.3961	22.5905	20.7147	17.0378	17.4488	12.5234	8.35238	9.12145	6.52275	4.2316	2.31517	3.84504	3.99221	4.46245	4.24372	3.54431	1.04821	1.10249	1.21299	0.719845	0.75967	0.315015	0.524772	0.418452	0.639542	VENTX
ENSG00000067082	779.655	704.838	1206.66	1215.09	321.125	626.128	610.342	720.102	589.52	387.14	289.476	267.201	259.287	255.492	189.592	196.811	208.82	119.349	118.133	112.851	175.048	171.181	111.128	131.628	136.708	75.2163	250.93	233.314	242.481	KLF6
ENSG00000118058	50.8485	47.2639	40.3677	43.1995	33.6781	15.8509	12.1022	10.8284	9.53488	7.41106	7.3442	11.9885	9.29524	10.2968	8.36212	11.3864	13.4066	15.5538	18.8436	15.8539	16.4452	15.1491	15.3209	13.07	17.1227	9.20398	16.6487	12.5892	14.2853	KMT2A
ENSG00000166949	38.9866	39.6496	22.1292	24.3222	45.5995	49.8189	17.5054	39.3703	61.9208	10.9066	14.0525	9.72306	11.7876	8.91029	7.08803	8.58637	8.66129	2.89775	2.64212	3.88032	1.59741	1.50337	1.57712	2.39098	2.44834	2.12476	9.16589	10.122	9.90327	SMAD3
ENSG00000100644	426.734	397.953	217.983	216.478	477.437	411.022	376.891	397.497	455.566	271.451	227.407	155.913	126.257	125.203	82.204	88.5185	114.464	77.4187	79.976	92.7294	81.1771	79.6503	84.717	80.9917	88.2586	63.8604	155.511	163.297	129.903	HIF1A
ENSG00000161642	188.403	152.437	147.654	155.914	214.78	264.831	148.954	136.989	123.971	98.6323	96.1228	56.1536	51.3286	41.8511	54.3455	58.283	70.925	81.385	90.8193	69.3984	138.353	138.449	110.543	92.5021	123.098	135.769	119.896	112.973	240.788	ZNF385A
ENSG00000153814	59.3288	53.9781	52.368	50.8627	46.8982	30.2793	30.3751	29.1308	21.2981	24.0513	17.1988	19.7866	13.5692	18.5036	11.8624	14.2039	13.3053	4.48804	4.19455	7.52154	10.5239	8.62735	12.1582	10.0496	10.8804	6.88739	9.6877	8.6834	9.10895	JAZF1
ENSG00000186951	10.5386	11.78	6.61193	11.6966	10.1204	4.4325	2.37814	2.19912	5.20037	2.92128	4.38918	4.06685	4.69683	2.68083	3.36092	3.60525	3.22198	11.9097	19.7886	5.32589	11.8007	11.4916	23.8818	27.2771	27.2444	21.0561	12.3064	22.1784	15.5943	PPARA
ENSG00000140548	60.6976	52.9097	79.7488	81.2476	48.3364	43.4302	34.9471	30.9934	42.5964	21.2338	22.8604	24.4283	18.089	18.6076	22.8894	27.8477	23.3443	44.9103	40.9422	32.4383	31.2129	28.5696	33.0491	33.4713	29.8447	26.2577	35.9248	29.6908	35.2963	ZNF710
ENSG00000114861	73.8853	74.2489	51.1131	58.508	56.087	41.6705	41.8838	40.9757	40.9115	23.7938	19.752	20.4697	16.2882	13.8368	13.489	14.9725	15.3537	10.7428	11.8277	11.1006	17.9531	19.0549	16.2056	13.8207	12.8642	12.3863	16.8686	17.34	14.2706	FOXP1
ENSG00000182568	48.8959	49.0982	33.1747	40.715	29.4308	29.7259	24.5409	26.434	21.1362	13.5335	23.9589	13.391	12.1538	10.6698	11.8654	14.0172	13.5195	13.7297	11.2411	10.7479	13.4283	13.5408	15.7594	12.9008	15.1911	7.33316	15.0231	13.6	11.4506	SATB1
ENSG00000101493	56.1774	49.6163	53.7783	48.319	40.2031	29.2669	29.5765	28.4285	16.6958	40.9674	26.1735	22.3381	17.943	16.9951	12.4118	16.1707	21.5308	25.8162	23.6257	19.7488	17.4609	15.6726	18.2501	14.5137	16.7169	9.68967	19.4668	14.2716	19.8098	ZNF516
ENSG00000165804	3.66033	2.76774	5.16617	5.70231	1.97451	3.74151	2.41554	2.18024	2.01505	2.18519	1.50413	1.46768	1.45976	0.928627	0.620492	1.88725	2.6697	18.1204	11.6947	15.1049	20.8635	21.5766	15.9571	16.663	18.2509	10.1101	20.2144	6.62811	28.2224	ZNF219
ENSG00000153234	158.541	143.329	49.7798	70.5607	98.3795	576.342	574.563	374.079	451.655	174.334	136.276	39.4102	31.8447	19.8385	7.44026	6.11142	7.26259	1.56052	1.75668	1.70189	1.15879	0.726716	0.745379	0.508153	0.378946	0.052823	0.807676	0.830138	0.439868	NR4A2
ENSG00000141258	29.3201	30.7624	31.187	28.8073	25.4724	16.5745	15.4986	11.0574	19.1541	6.0372	9.42737	5.90007	10.2658	4.07001	5.58029	4.2813	5.5395	9.28232	8.30943	6.39586	10.9182	10.7202	8.73052	11.0817	11.3727	12.3015	14.0023	15.7087	13.8681	SGSM2
ENSG00000179388	29.6903	25.5098	2.05701	1.99672	21.1721	495.428	462.25	293.217	367.716	100.353	64.9337	26.6348	17.4642	8.92332	2.91973	2.05964	2.05185	0.876061	0.70752	0.206228	0.885199	1.45984	1.5146	1.06651	0.781484	0.126893	2.35741	2.34054	0.054976	EGR3
ENSG00000130522	149.567	41.2045	205.435	230.052	29.4999	186.226	229.559	124.28	39.9594	57.3863	22.5513	53.6155	15.5934	48.8739	12.7971	15.225	39.8161	45.2283	43.9521	34.4057	42.8485	31.5244	37.713	25.7948	32.9534	4.17061	30.8755	4.67445	41.7599	JUND
ENSG00000168769	117.184	111.768	62.3716	90.3422	71.6433	92.8783	89.1662	145.061	79.1974	57.4578	46.6766	44.0042	29.2712	40.0252	32.2754	32.9977	29.6478	32.3278	32.5934	36.4188	35.2819	28.7334	31.6869	21.2165	25.3671	19.0624	30.4335	27.1525	18.0146	TET2
ENSG00000116604	106.261	105.372	73.0144	77.9296	126.873	151.093	137.489	126.068	156.216	80.8234	83.2406	76.6375	63.1738	50.9664	39.1713	34.0797	30.7317	23.0553	21.6278	20.6174	17.5057	19.2714	19.1209	20.4977	21.654	21.6052	23.4514	23.0621	25.3925	MEF2D
ENSG00000123358	114.829	105.71	35.2622	38.3589	177.292	1177.97	1081.39	662.624	1168.33	319.834	267.854	113.986	77.0394	36.9336	21.229	20.2432	13.613	2.52002	4.40663	4.19184	1.74435	1.45348	1.67266	3.33115	1.57306	3.46021	2.68697	3.70809	1.10189	NR4A1
ENSG00000020633	73.3707	71.8494	70.2823	75.2447	98.1011	155.621	140.313	73.4419	114.363	29.8847	60.6835	31.5105	51.3511	15.5655	38.7882	19.7249	15.7105	23.0701	26.1133	18.2074	20.7865	21.5407	16.0454	18.6884	19.4868	18.4174	21.4737	22.1267	25.5906	RUNX3
ENSG00000181827	18.9363	18.1397	15.3434	15.5546	15.1701	6.28352	5.97609	6.82964	4.87704	4.3712	5.88424	5.58227	6.20341	5.47018	3.32033	5.0786	6.25918	6.25805	7.05018	7.15112	6.76999	7.91353	8.58433	6.28492	7.62999	4.82384	8.19428	7.87256	9.2898	RFX7
ENSG00000162924	109.993	93.7311	57.9521	60.1931	88.7138	102.311	98.5781	112.737	97.2844	92.5232	78.6051	57.4974	48.6591	41.3192	32.92	23.8673	38.8674	21.7369	23.3153	26.359	32.8192	33.4295	26.9907	32.5104	39.1522	26.6422	45.3635	40.5201	39.9885	REL
ENSG00000109787	158.947	141.672	115.249	109.772	156.326	91.4064	87.5123	74.6162	37.5027	53.8746	45.0496	41.2628	39.3209	51.032	31.8641	41.1665	46.293	23.286	22.531	26.3875	24.9011	23.7003	31.2504	30.6307	30.9891	23.5729	57.6106	65.2293	47.2476	KLF3
ENSG00000118495	33.2831	36.8056	24.4515	37.2427	35.5638	25.394	24.1628	23.5837	16.5562	9.65285	16.7396	10.4329	20.9961	9.44793	12.2713	9.39183	12.7238	15.8773	21.1194	11.0321	14.8922	11.2209	10.1089	16.3711	18.8681	19.5639	13.6874	14.7791	12.7244	PLAGL1
ENSG00000144655	263.358	283.241	130.715	131.616	281.307	866.197	859.513	570.419	543.591	314.03	271.481	131.51	120.859	85.7028	85.6315	54.099	54.4894	25.9812	24.8067	18.3506	13.6899	14.1665	8.96276	7.59967	6.94154	8.50903	7.77231	7.17187	6.01755	CSRNP1
ENSG00000120798	17.4652	17.4075	16.3177	15.9672	14.1918	8.51906	5.82274	4.11573	4.08794	3.45623	2.62909	5.418	3.95206	6.75234	5.62988	4.9839	7.84973	7.7533	7.96464	11.2271	10.6769	8.17299	10.8388	9.40463	11.9273	8.52793	16.2707	12.0026	14.581	NR2C1
ENSG00000155090	193.735	188.129	130.268	278.175	182.835	288.141	288.762	430.092	225.032	251.613	240.69	203.351	512.395	185.714	185.726	168.601	142.771	83.3918	82.1611	58.1685	40.8973	40.4643	47.8478	40.3843	39.8397	67.7156	44.7354	112.906	82.5262	KLF10
ENSG00000134954	58.2815	59.3574	31.0116	33.0379	44.8825	21.9368	22.5755	25.5246	19.0776	29.3276	29.8123	30.8105	31.2294	27.6919	28.1911	20.4955	25.3783	14.7037	16.8891	19.4484	7.65717	7.30129	7.02129	2.92582	1.74202	1.34021	2.87026	3.5821	1.16105	ETS1
ENSG00000124216	11.8647	13.117	2.38789	1.91354	51.2685	398.163	359.025	261.188	369.433	122.535	98.0629	70.9434	50.8642	38.084	26.1007	16.1558	14.7304	4.12596	2.40752	1.28723	0.605459	0.257158	0.576384	0.199879	0.1182	0.435117	0.14879	0.178524	0.70174	SNAI1
ENSG00000158805	28.0413	45.4118	37.5266	39.8906	39.3953	24.9547	24.5217	19.5747	21.2808	11.5778	11.2097	10.7895	21.706	15.8865	20.6275	25.2237	22.6569	14.4225	11.1929	13.2988	11.5314	8.77542	9.36969	6.71863	8.52654	7.75555	8.09053	6.5848	7.7074	ZNF276
ENSG00000114315	34.7424	33.0047	1.19234	2.39877	28.2266	183.465	176.334	54.3749	107.903	22.9165	19.1519	17.7992	11.4747	13.7054	6.53725	14.614	5.58821	0.69709	0.849545	1.42381	0.046995	0	0.061173	0.091525	0	0.116224	0.079487	0.064328	0	HES1
ENSG00000160908	108.573	119.853	70.1128	69.2697	97.9646	75.1056	72.972	65.2628	64.6743	61.2211	52.6886	50.4739	43.9404	45.0579	42.7804	39.5125	40.1397	27.8511	23.32	28.6183	21.9163	20.8243	25.9266	21.1177	21.5986	20.4848	20.6992	20.6958	19.934	ZNF394
ENSG00000177606	372.827	240.918	823.887	832.501	125.96	333.957	322.355	365.683	347.137	456.123	320.85	628.348	405.227	627.806	324.698	335.652	439.786	174.394	176.866	183.295	184.903	179.317	128.245	155.064	162.752	95.049	148.971	75.5033	164.599	JUN
ENSG00000257315	26.5073	35.3434	27.1445	28.0842	19.5007	9.10002	9.04292	15.8408	10.0218	17.1935	20.016	23.6146	39.0718	51.2952	24.0014	23.5686	34.6262	8.57965	9.57584	10.0512	10.6962	11.5502	18.3569	14.2726	19.7994	7.79296	14.3913	10.9847	15.568	ZBED6
ENSG00000152784	0.637484	0.697888	0.841902	0.361695	0.146281	5.0484	4.67394	3.59237	2.96514	8.92504	11.4027	11.8136	6.72254	3.66333	1.37253	1.09642	1.69884	0.048929	0.184882	0.224606	0.126765	0.031349	0	0.070538	0.024333	0.044787	0.322024	0.049577	0.131072	PRDM8
ENSG00000126368	10.0984	11.6838	7.90945	10.2793	13.4249	16.8876	15.2893	8.09322	15.3546	6.27991	6.67282	5.20153	7.33221	12.9984	9.49337	19.3494	13.0407	2.96667	3.38057	1.92512	3.30494	3.21182	3.49158	4.07703	3.75649	3.94299	5.25762	4.76408	5.59977	NR1D1
ENSG00000069667	13.7004	17.5137	4.23039	8.75981	13.1618	8.71143	4.94685	13.0475	9.01151	14.1812	12.7049	8.94569	7.81914	8.15573	7.1165	4.44318	8.89386	1.37109	1.49297	2.75306	0.772719	0.828401	0.801373	0.230502	0.248034	0.236666	0.488162	0.416497	0.175857	RORA
ENSG00000131759	156.745	137.479	193.011	190.155	114.048	441.878	388.446	348.72	386.07	214.624	206.348	161.778	130.845	100.027	72.7862	78.7412	68.5611	55.3563	56.4853	51.934	61.9701	61.1932	44.7959	52.0654	49.8245	38.6853	32.996	24.5153	34.9745	RARA
ENSG00000174652	24.5713	20.4823	19.4633	20.4747	22.2455	12.5613	13.1479	9.92361	12.3069	7.82734	11.7102	11.9928	15.3662	13.0177	12.4553	10.0297	12.401	8.38255	9.9575	10.5043	9.64387	11.4472	12.3251	12.0998	10.6264	8.59388	11.3468	11.2902	13.8115	ZNF266
ENSG00000124813	18.9849	17.1214	11.1358	13.5579	14.6006	8.32535	8.57093	6.74404	4.09603	4.42516	4.88238	7.59094	3.26231	16.2085	7.6794	19.8642	16.8671	4.99224	5.14246	5.28458	1.82383	1.64597	1.76712	1.08079	1.21875	0.468663	1.25771	1.2185	0.648705	RUNX2
ENSG00000157557	169.939	163.158	65.8253	75.802	166.682	655.791	657.422	784.361	551.861	545.265	418.426	334.133	325.326	328.549	272.247	282.277	309.551	115.862	115.745	96.7983	45.0615	42.7024	45.4463	24.3683	25.6744	18.887	32.2601	39.9865	17.0194	ETS2
ENSG00000184221	8.63081	7.69352	12.9555	12.0158	2.54305	38.0635	34.3393	34.4083	29.3397	24.1459	11.0902	18.8757	9.36758	3.831	2.55552	4.96838	4.07815	3.59338	5.66019	4.96749	0.358249	0.459451	0.459407	0.907965	0.196922	0	1.87291	1.06993	0.800505	OLIG1
ENSG00000175197	228.208	266.619	69.851	67.8171	456.183	390.553	424.266	294.602	631.703	193.408	148.281	162.576	103.365	156.433	127.179	203.842	202.17	183.994	206.004	112.046	72.3672	77.7361	107.54	67.4795	71.4507	63.1566	64.5455	75.8428	68.5968	DDIT3
ENSG00000167034	0.282933	0.135044	0.272403	0.156742	0.367075	5.31947	6.16507	6.71026	7.33523	20.6061	21.94	33.4397	34.6121	14.4456	14.8121	9.3068	6.47814	1.6886	1.37848	0.395076	0.136027	0	0.089424	0.192117	0.24441	0.112138	0	0.09372	0	NKX3-1
ENSG00000111145	68.1006	59.8132	51.9355	53.2365	48.9525	175.641	165.639	202.205	132.009	179.044	139.735	107.625	82.1256	92.2969	69.7163	83.5951	96.0941	27.7898	26.7179	32.9942	15.3885	15.7867	18.5548	9.13936	11.313	6.37043	11.5201	11.6506	8.40283	ELK3
ENSG00000166987	53.4737	48.7063	44.8159	49.1906	42.9638	45.5492	45.609	47.5306	50.6895	33.78	43.1656	32.8116	32.2261	24.885	27.261	29.7791	29.5187	25.2066	19.7676	25.4305	17.3254	18.0453	17.0172	18.0678	12.7623	20.7914	17.577	17.3943	21.6747	MBD6
ENSG00000138378	9.10283	6.694	4.59311	4.53109	5.4893	7.01748	7.56993	15.4949	16.1985	16.1755	15.7371	9.73413	14.1675	6.85485	6.25767	3.4056	5.53749	2.10975	2.81999	4.07888	2.1888	2.11379	1.9975	2.08731	2.37572	2.0435	4.89921	6.03873	1.8459	STAT4
ENSG00000188290	0.117089	0	2.36955	1.6965	0.245649	38.3695	42.782	50.9257	39.9375	26.0261	18.6292	26.1202	3.16198	10.5678	2.38413	1.68078	2.98586	0.192659	0	0.469995	0.071305	0	0	0.092581	0	0	0	0	0	HES4
ENSG00000157554	0.135042	0.145439	0.134119	0.044932	0	0	0.126996	0.041482	0.054764	0.71077	1.33092	5.03604	10.7827	8.8661	11.6173	0.922636	2.38971	0.039803	0.013699	0	0	0	0	0.013168	0.015416	0	0	0	0	ERG
ENSG00000073861	3.70166	5.27983	3.13745	3.15252	2.61263	3.56543	2.63821	5.04172	4.67118	19.2059	36.7592	29.6593	59.0346	17.7708	30.2923	4.24179	8.96141	2.21906	1.26932	1.56683	0.591284	0.524077	0.906797	1.6282	1.39714	2.59996	0.322493	0.252746	0.506982	TBX21
ENSG00000137166	13.5442	12.2363	12.2195	12.3044	7.67686	11.4344	9.79755	6.72728	8.87128	3.51355	8.70464	5.17173	7.91922	4.5778	5.65907	6.44967	4.79554	7.67035	8.13331	2.50067	5.25253	5.1515	3.69899	3.95893	3.92881	2.61561	2.78257	2.7136	2.92709	FOXP4
ENSG00000081059	17.7963	21.1828	8.00737	9.71431	16.8325	7.04136	6.52837	8.10847	10.1823	7.15792	10.8712	7.08926	10.9185	9.79773	14.6965	7.43176	9.4717	4.00715	4.32254	6.8674	2.52257	2.66247	1.99814	1.35582	0.98237	1.99387	1.39409	2.20874	2.62438	TCF7
ENSG00000137265	15.6094	13.7801	13.4185	12.8598	6.43268	10.686	10.3772	13.5551	17.0394	15.2687	19.5573	16.2193	20.3436	13.9896	15.2983	8.8436	10.7881	7.21238	6.12471	4.70434	1.29457	1.43585	0.993902	0.555262	0.336565	0.12041	1.25728	1.16171	0.290646	IRF4
ENSG00000075426	243.513	249.546	130.919	171.766	89.9266	360.801	611.882	453.155	300.254	348.401	339.338	240.58	242.331	201.604	177.608	145.395	145.062	79.8365	78.9233	70.4299	33.3925	24.769	39.1208	22.2038	21.8807	12.4014	10.627	27.9634	23.947	FOSL2
ENSG00000179361	22.555	23.3953	19.1897	19.5699	23.6	35.1137	34.553	25.3243	17.4965	29.7227	24.2851	32.7064	26.9417	32.2972	28.35	30.5952	32.5875	11.6118	12.6533	9.27244	3.91097	4.0525	3.83666	4.4977	3.6982	5.43815	4.10567	4.55489	2.81816	ARID3B
ENSG00000148516	2.74259	1.84302	0.651815	0.75453	1.46662	1.18817	1.1588	3.72519	2.41119	35.0356	21.9311	21.0075	31.5766	31.2472	16.7485	9.96185	19.4277	0.943623	1.13512	0.901431	0.278805	0.286778	0.876832	0.528153	0.572226	0.804876	0.040029	0.097185	0.076073	ZEB1
ENSG00000185507	41.3191	25.9506	43.954	46.2881	16.7088	44.9091	41.1925	41.4792	40.1325	49.8004	46.5643	55.5317	49.0874	38.4163	42.4058	41.0674	33.631	43.3036	42.4756	28.8425	13.3351	13.3676	11.0912	10.775	8.95957	5.84439	5.64802	2.71949	4.27847	IRF7
ENSG00000189180	10.9724	10.6034	10.9277	9.94661	25.0612	7.84924	6.65806	12.5941	6.69517	5.04956	8.0049	4.18296	10.9777	14.4788	11.1552	12.2552	19.0195	16.2715	9.26188	19.7251	6.50831	7.56108	4.99642	5.90567	6.25745	9.38597	4.62708	5.92056	7.82949	ZNF33A
ENSG00000165655	13.2066	6.08615	12.5735	12.414	2.87219	11.7702	10.1283	16.4592	5.09483	13.7028	3.98031	7.72425	2.19695	7.23117	2.02113	2.72799	5.1047	4.34335	4.2913	3.28268	3.5142	3.13309	2.59365	2.78017	3.04257	0.767325	2.88535	2.02584	2.96479	ZNF503
ENSG00000010818	9.45187	9.57937	6.39779	7.08099	6.89466	19.1424	17.9324	50.3974	38.3444	42.4479	58.7195	30.7838	40.2592	35.7963	33.3109	30.3235	32.9097	10.521	10.4088	6.80337	2.69591	2.81154	2.61845	3.42258	3.56406	4.85049	4.5058	5.2458	4.95481	HIVEP2
ENSG00000104856	35.8257	28.9755	34.7264	35.2187	38.2433	97.2014	96.0565	68.8121	70.3591	30.9356	42.4537	30.7291	33.5049	23.6034	21.2459	37.9152	29.1228	44.8064	44.4459	38.2624	20.3392	19.4024	15.3084	7.08713	8.74559	10.0608	12.1335	12.0451	12.5357	RELB
ENSG00000123636	117.728	96.4694	72.8519	78.8457	99.0237	67.1393	69.3171	62.1904	28.6264	25.59	17.2173	32.4152	29.5574	49.5953	43.6021	55.6493	59.0062	47.8744	63.1046	52.7093	39.2385	35.7656	43.3491	37.2327	38.7753	25.2158	37.7342	33.2292	36.8897	BAZ2B
ENSG00000106546	276.291	219.405	128.965	131.532	134.46	267.296	272.499	282.944	133.855	178.265	108.585	111.698	78.7479	131.534	69.8239	130.011	154.541	98.9157	98.8416	132.483	80.2514	82.3754	63.7169	41.3625	48.2344	33.0841	58.0436	56.2325	45.1363	AHR
ENSG00000169155	21.7719	20.0176	5.72909	7.7249	21.5652	177.425	175.884	198.321	137.055	67.8761	139.012	47.8061	100.213	33.8622	69.1088	16.9759	20.9235	29.2409	7.62686	25.4775	5.00342	21.0494	6.64622	5.739	5.40986	6.26096	6.62918	4.82377	9.33765	ZBTB43
ENSG00000198839	64.9317	62.157	55.5772	55.0956	53.8897	56.0984	59.3586	53.6097	57.8038	50.3956	29.7195	33.7147	24.6835	38.5996	24.9642	36.9892	40.513	28.2019	27.621	28.7638	26.2266	28.455	26.7641	20.8511	25.1232	13.762	23.4024	23.3883	21.6042	ZNF277
ENSG00000077150	101.952	98.717	75.1244	71.8418	104.225	226.282	223.07	196.297	267.333	107.279	181.858	91.6063	141.323	70.3694	100.685	127.737	93.4826	128.057	120.392	120.65	50.3248	49.6791	51.6272	22.2773	26.6498	24.0118	30.1508	34.295	33.7906	NFKB2
ENSG00000164683	0.241848	0.127693	0.04405	0.099246	0.474254	18.5341	19.3091	15.5502	18.85	16.12	14.7769	9.73208	6.74979	4.39827	1.08704	0.73472	1.18562	0.152718	0	0.389607	0	0.27956	0.042325	0	0.043398	0	0.05463	0.044211	0	HEY1
ENSG00000157933	34.7831	25.4938	40.8947	44.3452	22.29	106.76	107.248	87.6976	103.724	42.8992	40.6215	26.546	26.7034	22.9927	19.7125	30.3616	26.311	35.6481	35.4508	27.3156	25.2307	25.0157	24.2552	19.2671	18.8122	9.9797	10.4658	6.49832	10.1548	SKI
ENSG00000165606	0	0	0.111264	0	0	13.5684	13.6981	12.136	7.24803	33.7207	25.3576	21.667	16.1411	14.5611	4.96384	2.47513	3.80473	0.073475	0.119678	0.109303	0.027194	0.117688	0.053454	0.035308	0	0	0	0	0	DRGX
ENSG00000177374	3.26931	0.705139	0.279003	0.780545	1.1686	39.1735	33.6696	27.3305	21.954	9.82736	7.33312	6.43159	6.02874	2.80184	2.07596	0.773647	1.57356	4.64083	3.91278	5.13137	2.84525	3.20205	2.17706	0.865062	0.779875	0.116381	0.441644	0.048231	0.037753	HIC1
ENSG00000011243	78.1091	88.4485	81.4052	87.1517	95.1139	50.3921	48.5357	39.9288	55.4914	25.8076	30.6478	60.519	60.0383	83.735	80.8941	116.378	85.0859	73.8783	75.2233	59.5037	34.4069	33.4574	47.3738	32.0352	36.3564	30.0285	23.5866	29.4281	32.0583	AKAP8L
ENSG00000172819	4.57361	7.34176	9.12151	8.59038	9.69104	26.6326	28.0808	15.0503	18.9653	27.2309	37.6833	60.8916	77.8947	43.8819	63.9134	26.9739	26.8345	19.7087	24.5038	20.1938	17.0429	14.7757	15.3839	12.2849	11.2458	10.3064	2.6712	3.72695	1.45968	RARG
ENSG00000179348	0.622898	0.631296	0.225287	0.252161	0.255983	13.0696	15.1479	19.9859	12.1968	20.1167	15.4922	6.27938	4.95498	1.78529	1.15154	0.292625	0.583479	0.317897	0.135701	0.280236	0.143161	0.152508	0.28862	0.028596	0.377571	0.136176	0	0.025084	0	GATA2
ENSG00000188313	124.718	99.0384	130.655	113.721	128.949	199.313	180.106	272.076	252.84	244.892	194.742	118.997	103.831	92.0896	67.9869	68.5241	93.3914	74.8917	74.0043	84.5842	57.1211	56.3692	59.3979	39.8589	59.6705	43.4356	38.5299	37.6754	33.1226	PLSCR1

## Sheet: Table S5
Supplementary Table S5: 7 Clusters of 219 up-regulated differentially expressed TFs during the intermediate stage.
	mono	h0	h2	h4	h8	h12	d1	d2	d3	d4	d7	Cluster	gene name
ENSG00000143842	0.268785	4.49012	9.00765	10.5723	10.4046	6.91268	5.14889	4.97135	10.8053	9.96994	21.342	6	SOX13
ENSG00000144485	1.13039	1.11381	1.17613	1.439	1.02447	1.45534	2.26205	3.59016	4.83288	6.9212	18.3855	6	HES6
ENSG00000147488	0.131382	0.287641	0.165548	0.59685	0.429044	0.521135	2.68015	4.5415	7.49199	7.05335	12.9611	6	ST18
ENSG00000025434	6.24644	2.29198	0.844578	1.26853	3.68283	5.13102	19.9433	62.0018	180.871	184.396	306.846	6	NR1H3
ENSG00000204611	2.50724	0.541685	1.44759	4.05393	7.81346	8.45741	12.3046	12.9296	16.5055	15.3549	16.8317	6	ZNF616
ENSG00000171604	28.1622	23.7363	30.4506	49.9879	63.535	63.1516	99.6596	119.638	143.366	128.793	147.842	6	CXXC5
ENSG00000064961	48.4902	28.2316	13.6098	20.4243	45.9505	49.5513	87.7308	131.053	162.463	99.0793	134.067	6	HMG20B
ENSG00000178175	1.74329	0.419436	1.07985	3.17138	10.5193	19.3772	47.8743	49.2342	60.8216	29.4926	38.0961	6	ZNF366
ENSG00000196418	14.1496	14.8931	9.81468	16.9309	28.6584	34.1121	50.6717	60.9795	60.0369	38.3452	47.9121	6	ZNF124
ENSG00000187098	9.21207	10.8705	25.5413	54.7246	92.6185	71.8268	129.887	119.064	90.7206	106.268	227.978	6	MITF
ENSG00000198105	2.97593	0.487712	0.449526	0.862969	2.21808	3.09576	9.85256	7.94686	6.46838	5.89918	10.1802	6	ZNF248
ENSG00000165804	3.85421	2.58808	1.84466	1.46372	0.774559	2.27847	14.9733	19.4657	15.008	13.4212	28.2224	6	ZNF219
ENSG00000105698	119.644	140.954	116.771	138.459	143.969	147.529	261.192	280.378	318.804	257.063	372.235	6	USF2
ENSG00000126351	15.9668	12.6451	6.34141	25.2089	86.0834	58.3647	35.3674	61.1361	76.0692	77.0883	77.31	6	THRA
ENSG00000198715	43.56	29.0031	26.7679	45.8523	87.954	89.645	78.4787	69.9164	130.473	128.825	149.892	6	GLMP
ENSG00000167555	4.12489	1.78559	1.13542	3.20292	6.76746	6.17596	6.31974	5.87298	10.4832	10.0406	11.1511	6	ZNF528
ENSG00000116016	1.35565	14.244	37.6027	71.4574	85.2781	56.8471	38.654	122.261	225.186	178.963	231.514	6	EPAS1
ENSG00000178573	4.36851	9.55755	10.763	14.594	11.5775	6.79487	8.57138	29.122	33.7143	62.646	45.6231	6	MAF
ENSG00000123095	0.0437904	0.860631	0.724858	0.395942	0.578706	1.02844	9.44451	33.7667	28.3756	52.503	60.235	6	BHLHE41
ENSG00000197928	2.55822	1.17066	1.1109	1.50378	2.24932	3.50516	4.11428	7.94932	9.73043	12.7609	11.2079	6	ZNF677
ENSG00000153207	21.3375	42.3299	23.8972	31.1604	33.5152	37.3135	40.9081	37.9432	27.7292	25.9363	30.3366	5	AHCTF1
ENSG00000112033	21.8744	45.9941	33.2059	36.4839	54.1493	53.022	45.8847	31.9165	29.2929	22.4552	22.0262	5	PPARD
ENSG00000153879	37.7788	91.9954	82.1274	53.8599	69.425	99.9915	85.7906	64.7818	49.9978	45.2359	38.2849	5	CEBPG
ENSG00000084093	26.7209	23.2746	44.0688	38.2633	34.154	49.7324	52.1001	44.4669	36.3688	33.3483	36.622	5	REST
ENSG00000123268	25.6814	29.2105	47.3271	43.5385	42.5402	47.7045	47.3333	43.4352	29.0175	30.1164	30.7473	5	ATF1
ENSG00000086102	28.5222	49.0279	58.1168	41.0566	34.9474	42.0331	49.1604	44.8854	44.0658	39.6974	42.0622	5	NFX1
ENSG00000183340	5.17592	18.7761	24.7267	22.4171	19.2529	23.1809	24.5922	20.3711	17.5707	21.7524	19.1378	5	JRKL
ENSG00000136997	6.96648	16.5747	37.2298	20.7952	17.4512	30.0658	26.2683	25.207	18.5562	17.2107	8.66504	5	MYC
ENSG00000136870	7.62514	19.8883	34.9809	30.9211	25.02	27.5507	23.8154	19.9865	21.3145	17.4819	16.6484	5	ZNF189
ENSG00000183621	15.6572	25.1616	65.9193	53.1288	40.551	52.5032	47.443	36.6195	24.7547	32.4916	30.3816	5	ZNF438
ENSG00000090612	2.97906	2.14678	4.97241	11.9479	15.2624	10.5711	14.1295	13.8189	19.34	6.19878	17.6549	5	ZNF268
ENSG00000204644	2.34457	0.359868	1.19109	8.47842	11.4081	10.8115	9.38848	11.3565	11.7642	6.58028	8.38614	5	ZFP57
ENSG00000185669	7.41112	2.12635	5.977	15.5727	22.6667	19.0569	61.8007	85.5122	100.637	21.3562	25.4787	5	SNAI3
ENSG00000180346	3.15144	3.9737	2.52468	4.56558	6.21123	7.88858	9.05646	11.9432	7.46794	9.25229	7.96204	5	TIGD2
ENSG00000063438	0.194605	0.719556	0.84283	0.792007	5.92506	10.881	34.8106	52.6654	20.0737	14.3579	10.9437	5	AHRR
ENSG00000174796	9.76733	11.295	9.83585	12.29	13.7923	12.0953	19.7369	20.9758	14.8299	15.6002	11.7685	5	THAP6
ENSG00000136630	10.4782	16.5452	17.0169	11.768	10.5271	14.5078	27.0126	21.5562	10.4181	14.0979	17.999	5	HLX
ENSG00000213588	1.4736	1.2256	2.89197	7.59725	10.5845	13.9316	17.5477	12.0846	14.0752	13.353	12.9769	5	ZBTB9
ENSG00000169957	8.15107	1.31217	1.13391	4.15169	6.36124	17.1922	37.0895	24.773	16.9436	14.4498	16.132	5	ZNF768
ENSG00000197619	5.60833	2.19305	4.32049	8.86893	7.56734	9.53302	18.1217	8.44328	6.25092	11.2954	3.07526	5	ZNF615
ENSG00000066697	4.31448	14.7184	56.3817	56.8386	64.4418	64.4594	144.676	65.5763	67.0089	25.3013	32.4979	5	MSANTD3
ENSG00000178860	0.249422	7.97751	47.4718	50.8499	73.9195	128.869	267.667	151.263	122.711	56.084	60.5181	5	MSC
ENSG00000029153	1.93245	2.80836	4.10988	3.68158	3.924	8.70368	18.5257	8.56911	5.94038	3.04853	4.05166	5	ARNTL2
ENSG00000137947	52.1723	156.421	130.195	146.845	166.031	160.429	102.62	71.6546	63.7371	60.0294	56.5078	2	GTF2B
ENSG00000169057	19.5122	43.501	45.555	49.0499	50.5771	46.3801	25.1785	18.8715	21.4165	19.7182	21.3937	2	MECP2
ENSG00000119725	28.664	64.4708	59.5194	62.76	74.9644	59.1161	40.6583	44.4326	42.6095	41.711	42.6422	2	ZNF410
ENSG00000122482	18.3411	54.8634	37.1785	50.4053	55.0101	43.9726	35.4055	32.8381	25.1824	23.7723	21.6566	2	ZNF644
ENSG00000116809	23.5372	53.5148	44.5553	36.5119	36.3294	40.3886	33.4739	24.9245	25.0344	18.3242	23.4151	2	ZBTB17
ENSG00000159216	42.6149	149.084	106.581	100.481	110.508	126.56	96.7725	76.3942	54.4335	52.8425	54.2484	2	RUNX1
ENSG00000112242	33.9252	65.0336	70.1611	59.2965	57.8186	65.0705	41.3158	33.8523	30.1315	32.1933	29.6448	2	E2F3
ENSG00000010818	7.88094	31.4542	50.5837	35.5215	34.5536	31.6166	9.24439	2.70863	3.94571	4.8758	4.95481	2	HIVEP2
ENSG00000198517	25.3418	176.543	150.133	148.684	126.911	114.072	50.461	30.1901	36.9496	29.7315	39.8745	2	MAFK
ENSG00000172216	47.4123	528.06	414.548	445.149	321.629	329.04	232.602	163.96	130.78	86.3792	153.365	2	CEBPB
ENSG00000143067	11.9459	77.1946	94.9533	75.0118	70.9424	56.7738	35.7214	25.5628	24.3958	21.6426	28.683	2	ZNF697
ENSG00000167394	10.6444	38.3829	42.4274	34.5915	24.172	22.6445	16.6075	14.8147	10.9742	8.67431	10.2699	2	ZNF668
ENSG00000159885	1.35898	23.6279	26.2449	16.9922	12.8316	14.7712	6.85951	4.63222	3.34608	6.00276	5.27038	2	ZNF222
ENSG00000101126	29.9635	60.0349	73.4133	72.2393	22.821	41.8791	17.2659	31.3796	37.1785	27.3913	34.703	2	ADNP
ENSG00000138378	6.08207	11.5702	15.9563	11.9508	6.55626	4.47154	3.00287	2.10003	2.16885	5.46897	1.8459	2	STAT4
ENSG00000095794	8.44933	304.985	478.373	280.442	149.133	82.3422	23.985	19.2726	16.3606	19.6612	13.0362	2	CREM
ENSG00000101544	18.7714	73.311	112.745	68.5114	38.3724	23.4328	12.2584	16.1588	14.8368	13.1688	13.869	2	ADNP2
ENSG00000197279	0.253409	21.5764	29.3103	15.4063	4.53393	2.75974	0.528875	0.397792	0.214055	0.505916	0.340292	2	ZNF165
ENSG00000168152	3.5375	11.9183	15.0248	9.62855	5.63202	4.2728	3.22076	3.62781	2.26617	3.70265	2.63268	2	THAP9
ENSG00000165606	0.0222528	11.6627	29.5392	18.9041	9.76247	3.13993	0.100819	0.066112	0.0117693	0	0	2	DRGX
ENSG00000152433	0.308975	6.02361	10.0053	6.84017	3.42363	2.29379	1.64489	1.10236	1.54636	2.29066	1.61348	2	ZNF547
ENSG00000182759	0	2.99446	13.5434	5.94586	1.43367	0.359073	0.042568	0	0.070759	0	0.152348	2	MAFA
ENSG00000102908	15.1537	28.576	48.3872	24.8394	17.5366	15.7575	10.5257	9.8057	11.3956	8.74957	11.8086	2	NFAT5
ENSG00000131848	6.41903	10.82	72.1603	54.6141	26.4579	12.9502	8.9824	13.3486	9.95262	11.6131	10.6436	2	ZSCAN5A
ENSG00000176946	19.8249	32.4492	95.3212	88.2497	39.3561	29.6947	29.155	26.2064	23.4877	22.3505	22.4191	2	THAP4
ENSG00000132170	2.04594	231.249	415.018	394.268	233.355	142.644	86.9347	132.144	132.026	83.7305	93.686	2	PPARG
ENSG00000172000	0	5.19456	12.146	14.378	5.85258	2.49158	0.0529703	0	0	0	0	2	ZNF556
ENSG00000152784	0.53705	4.06996	10.1639	9.26809	2.51793	1.39763	0.152806	0.0527047	0.0465527	0.185801	0.131072	2	PRDM8
ENSG00000186300	2.64647	12.9555	26.5115	22.2031	10.4221	7.39952	3.89146	3.77329	2.33995	2.29009	3.36453	2	ZNF555
ENSG00000178764	7.27159	11.9061	21.5321	15.8811	7.82379	9.88377	9.51148	8.29402	6.63708	4.38996	3.13299	2	ZHX2
ENSG00000236287	57.8819	78.8907	107.656	101.322	68.4512	61.2508	60.5983	52.1502	41.9315	43.466	39.4525	2	ZBED5
ENSG00000105722	23.8202	32.3456	50.2504	51.5232	26.2696	26.0415	30.7314	10.272	15.5589	14.4669	7.46418	2	ERF
ENSG00000106261	26.0679	29.1085	49.1876	43.1268	30.0577	18.5243	25.525	27.6374	17.0811	28.1078	29.1123	2	ZKSCAN1
ENSG00000185022	27.0847	303.428	410.973	242.824	201.332	136.327	77.1436	101.921	128.942	67.3323	146.098	2	MAFF
ENSG00000122877	42.4078	512.999	892.227	553.564	335.595	333.725	427.1	326.052	255.265	349.104	262.426	2	EGR2
ENSG00000171606	13.2918	54.6317	68.6018	52.325	25.9572	26.6862	26.2169	25.3271	23.1366	34.6608	33.7844	2	ZNF274
ENSG00000189308	10.3372	28.8377	40.4273	25.1833	14.544	17.3005	18.5926	18.8481	19.2963	15.2853	20.5814	2	LIN54
ENSG00000102804	14.9187	61.6581	65.508	43.0291	44.0123	50.1013	26.6718	28.0576	34.0416	52.5445	51.6956	7	TSC22D1
ENSG00000136169	17.2288	53.4518	40.5999	35.1554	29.0859	29.7283	41.0975	46.4151	48.6946	57.2853	51.7121	7	SETDB2
ENSG00000125812	43.2807	97.7443	14.122	8.30192	11.2283	16.89	16.75	13.1196	9.62859	13.8826	12.0317	1	GZF1
ENSG00000125740	459.471	1000.41	194.574	47.4069	16.9698	6.625	1.09988	0.778737	0.510036	0.408452	0.564072	1	FOSB
ENSG00000165030	133.872	255.295	70.6438	32.0939	22.3562	26.0073	31.3865	25.3932	10.4281	18.0617	12.4885	1	NFIL3
ENSG00000087903	12.0401	27.9758	8.01568	10.0399	4.74884	3.94516	9.59739	5.94966	5.73237	4.64167	4.20664	1	RFX2
ENSG00000157933	33.5614	101.357	41.7603	26.6247	21.3526	28.3363	32.8048	24.8338	16.0197	8.48204	10.1548	1	SKI
ENSG00000112658	44.6302	97.756	48.063	45.5853	33.507	39.2339	38.7817	36.2883	34.8732	29.9281	23.7741	1	SRF
ENSG00000177374	1.24052	30.5319	8.58024	6.23017	2.4389	1.17361	4.56166	2.74145	0.587106	0.244938	0.037753	1	HIC1
ENSG00000130844	8.81005	303.073	117.743	40.3998	12.6221	18.9809	25.1047	17.791	14.8197	25.1717	28.7935	1	ZNF331
ENSG00000179388	16.0852	404.653	82.6433	22.0495	5.92152	2.05574	0.596603	1.28655	0.658294	2.34897	0.054976	1	EGR3
ENSG00000123358	94.2905	1022.58	293.844	95.5126	29.0813	16.9281	3.70616	1.62349	2.78814	3.19753	1.10189	1	NR4A1
ENSG00000124216	16.1103	346.952	110.299	60.9038	32.0923	15.4431	2.6069	0.479667	0.251065	0.163657	0.70174	1	SNAI1
ENSG00000115844	0.0456648	10.6059	2.47819	1.53892	0.545833	0.258352	0.0582433	0.09848	0.0392517	0	0	1	DLX2
ENSG00000114315	19.913	130.519	21.0342	14.637	10.1213	10.1011	0.990149	0.036056	0.0692497	0.0719075	0	1	HES1
ENSG00000135625	0.192803	16.6244	1.81061	0.245958	0.124486	0.0689315	0.0139623	0.045353	0.0545947	0.100717	0	1	EGR4
ENSG00000119508	2.10112	709.087	165.024	92.3703	36.7258	11.0947	8.50039	36.5278	56.106	48.5628	23.8408	1	NR4A3
ENSG00000072310	28.0426	56.4522	31.5551	21.3684	20.0123	17.2235	13.7669	11.2518	15.7493	16.961	20.3016	1	SREBF1
ENSG00000153234	104.118	494.16	155.305	35.6274	13.6394	6.68701	1.67303	0.876961	0.313307	0.818907	0.439868	1	NR4A2
ENSG00000144655	218.047	709.93	292.755	126.184	85.6671	54.2942	23.0462	12.2731	7.68341	7.47209	6.01755	1	CSRNP1
ENSG00000134107	163.613	460.727	287.599	171.047	129.88	122.999	95.5595	69.4057	84.0134	76.0056	76.6148	1	BHLHE40
ENSG00000196843	54.0976	310.702	182.118	98.9331	69.0548	78.2376	49.8065	34.3601	26.2117	27.3718	22.212	1	ARID5A
ENSG00000117036	54.8107	319.418	189.024	96.796	64.1227	56.6546	34.7292	23.1253	25.8986	24.4895	25.5833	1	ETV3
ENSG00000184221	8.76773	34.0377	17.6181	14.1216	3.19326	4.52327	4.74035	0.425702	0.368296	1.47142	0.800505	1	OLIG1
ENSG00000131759	158.288	391.278	210.486	146.311	86.4065	73.6511	54.5919	55.9864	46.8584	28.7556	34.9745	1	RARA
ENSG00000172262	26.9246	48.7916	33.6828	22.8694	25.5456	36.6658	33.4036	31.9157	25.7693	28.3897	24.5847	1	ZNF131
ENSG00000175197	217.735	435.281	170.845	132.97	141.806	203.006	167.348	85.8812	67.3623	70.1941	68.5968	1	DDIT3
ENSG00000100219	156.379	464.728	212.748	221.967	199.153	242.432	180.938	146.959	74.4998	68.2808	70.3899	1	XBP1
ENSG00000104856	34.5979	83.1073	36.6947	32.117	22.4247	33.519	42.5049	18.35	8.63118	12.0893	12.5357	1	RELB
ENSG00000077150	90.3721	228.246	144.569	116.465	85.5272	110.61	123.033	50.5437	24.313	32.2229	33.7906	1	NFKB2
ENSG00000136603	35.0159	270.092	318.827	184.862	69.8103	77.2412	52.2028	61.147	31.8124	18.825	22.3327	1	SKIL
ENSG00000205927	0.0342584	63.7027	81.2476	31.7831	11.3687	14.7212	14.7097	1.27701	0.198913	0.042565	0.258448	1	OLIG2
ENSG00000179348	0.397525	15.1001	17.8045	5.61718	1.46842	0.438052	0.244611	0.194763	0.180781	0.012542	0	1	GATA2
ENSG00000095951	19.4319	80.995	86.6766	55.0739	26.9618	17.0973	18.1662	17.6419	13.8097	20.6389	18.8143	1	HIVEP1
ENSG00000173451	12.4292	120.139	113.978	50.8299	18.4266	12.3244	9.17297	6.06246	4.84498	3.95466	4.2625	1	THAP2
ENSG00000164683	0.197418	18.0608	15.4484	8.24094	2.74265	0.960171	0.180775	0.107295	0.014466	0.0494205	0	1	HEY1
ENSG00000105856	117.837	200.847	203.661	111.855	79.172	76.5548	70.0076	58.22	44.5611	56.9358	69.1673	1	HBP1
ENSG00000198026	32.6577	60.1225	59.8818	40.0931	26.4202	22.4743	21.3762	18.6139	17.4748	14.5838	15.7069	1	ZNF335
ENSG00000188313	119.416	226.084	219.817	111.414	80.0383	80.9578	77.8267	57.6294	47.655	38.1027	33.1226	1	PLSCR1
ENSG00000188785	26.7526	62.232	55.6284	33.402	19.147	15.1714	10.9981	12.4762	11.139	16.6259	14.0239	1	ZNF548
ENSG00000131196	13.0813	27.7897	28.9807	17.4358	13.6159	7.68444	9.73582	8.05188	7.80165	10.3399	11.1567	1	NFATC1
ENSG00000117000	34.6463	67.8614	66.6189	59.1677	44.863	38.8894	28.7157	21.2559	17.7255	19.3348	18.3217	1	RLF
ENSG00000111145	56.4077	168.873	159.389	94.8751	81.0066	89.8446	29.1673	16.5766	8.94092	11.5853	8.40283	1	ELK3
ENSG00000075426	177.134	431.523	343.87	241.456	189.606	145.228	76.3966	32.4274	18.8286	19.2952	23.947	1	FOSL2
ENSG00000102034	110.283	229.576	150.888	135.323	133.161	112.064	84.3817	77.3643	79.4351	59.5401	59.3733	1	ELF4
ENSG00000175592	14.8341	183.512	115.909	106.657	96.0867	79.4046	25.0351	11.9696	9.73506	7.99766	5.18491	1	FOSL1
ENSG00000157557	128.281	662.359	481.846	329.73	300.398	295.914	109.468	44.4034	22.9766	36.1233	17.0194	1	ETS2
ENSG00000128272	524.703	1466.65	1074.25	991.373	853.965	882.487	509.935	411.137	287.526	412.252	257.973	1	ATF4
ENSG00000111424	22.9379	146.288	134.837	101.733	56.4139	55.0397	79.5846	44.2535	24.142	14.6199	11.6079	1	VDR
ENSG00000173276	29.324	115.621	88.0783	77.623	57.1517	46.5607	32.0066	29.9097	34.4703	29.8216	26.7393	1	ZBTB21
ENSG00000188290	0.885757	43.0037	22.3277	14.6411	6.47598	2.33332	0.220885	0.0237683	0.0308603	0	0	1	HES4
ENSG00000169155	15.3617	172.171	103.444	74.0095	51.4855	18.9497	20.7817	10.8997	5.80327	5.72648	9.33765	1	ZBTB43
ENSG00000185947	55.831	527.238	342.212	207.854	179.688	161.486	124.194	68.5787	53.1619	61.4217	58.3113	1	ZNF267
ENSG00000120690	152.198	551.569	359.406	267.971	228.953	208.204	155.125	157.204	122.48	127.141	116.404	1	ELF1
ENSG00000177426	32.0733	461.522	376.041	121.345	103.76	101.528	70.8952	40.464	31.6564	39.2535	36.5753	1	TGIF1
ENSG00000109320	72.0745	449.152	371.47	203.999	133.318	139.474	106.294	56.3331	40.0326	49.2321	46.3055	1	NFKB1
ENSG00000146676	30.2657	231.028	180.861	102.363	65.3017	58.2702	41.0028	38.2148	38.0959	36.3232	34.9746	1	PURB
ENSG00000251192	2.76547	16.7823	14.3807	9.18435	7.42313	6.52575	6.2585	3.10872	2.98335	2.75127	3.30711	1	ZNF674
ENSG00000156273	176.225	564.589	484.566	292.128	278.453	284.346	234.484	209.083	107.62	188.417	158.528	1	BACH1
ENSG00000171161	16.8131	44.2302	27.5704	32.317	14.5975	20.3972	31.7785	18.693	18.8036	16.6854	21.452	1	ZNF672
ENSG00000167491	44.7897	139.311	64.5059	94.7593	80.3537	52.6771	57.7139	47.7881	53.1569	50.7557	81.4835	1	GATAD2A
ENSG00000116044	88.887	511.846	111	270.274	269.377	187.721	184.807	137.005	101.874	61.4321	68.097	1	NFE2L2
ENSG00000198538	3.79005	2.88135	7.35946	28.1304	32.2791	54.4026	21.4266	26.807	26.2801	23.3346	22.2355	4	ZNF28
ENSG00000104221	7.96313	1.76974	3.6977	9.06613	27.9222	31.0801	13.4441	9.55286	10.2168	9.43218	8.01373	4	BRF2
ENSG00000056277	2.90877	1.31726	2.68001	6.13353	7.91838	10.3024	5.09717	3.91372	3.70011	3.76417	2.26535	4	ZNF280C
ENSG00000256294	2.27673	0.59329	1.46125	6.38595	11.085	14.2425	10.5803	9.10229	9.47909	8.94455	7.4425	4	ZNF225
ENSG00000263002	2.36375	0.937811	2.87228	10.0551	15.5448	18.9288	17.0522	11.9177	13.102	11.1338	9.34566	4	ZNF234
ENSG00000167625	5.16248	2.70012	5.85278	8.00417	16.1079	16.3459	14.8483	9.80712	11.476	8.88544	9.62676	4	ZNF526
ENSG00000124444	3.69182	1.96226	4.28554	7.42146	13.6891	11.7491	10.2754	8.01219	8.86149	6.37654	7.62414	4	ZNF576
ENSG00000170396	2.47696	0.796712	3.82323	3.75711	10.1755	16.4067	10.0629	10.7418	6.01315	4.91808	4.7608	4	ZNF804A
ENSG00000167637	3.93978	0.898698	0.868187	5.63255	10.1662	13.2587	11.5379	7.70309	5.76448	5.81907	6.93799	4	ZNF283
ENSG00000170903	11.0674	7.9958	8.42337	19.9138	25.8315	39.781	33.4599	20.9394	18.0183	18.9292	17.141	4	MSANTD4
ENSG00000196152	4.11638	5.73568	8.25403	12.8815	12.0818	18.4608	18.3812	12.0915	12.2034	8.82662	9.45432	4	ZNF79
ENSG00000186416	7.68499	4.1767	9.25679	20.337	20.1937	20.4683	21.3636	17.2809	16.0602	13.6535	12.4663	4	NKRF
ENSG00000105497	3.07502	1.2674	5.36826	9.7122	9.22657	12.7176	11.9536	8.15018	6.35115	6.92282	5.28593	4	ZNF175
ENSG00000166261	7.76368	3.48211	10.6401	21.087	24.6702	27.4751	27.4285	14.1395	16.6999	10.6744	10.5562	4	ZNF202
ENSG00000186130	5.85873	3.42957	14.0378	23.3029	29.5482	27.2009	22.3126	18.2213	15.8338	16.6548	14.4083	4	ZBTB6
ENSG00000167562	7.76735	7.27856	12.8403	24.2287	26.791	23.9365	18.471	14.5504	12.9779	16.1011	15.7472	4	ZNF701
ENSG00000177946	5.08458	1.41136	6.81128	16.2046	21.0314	20.383	19.1467	9.51293	7.29743	12.0842	11.8409	4	CENPBD1P
ENSG00000197362	3.30371	0.938136	3.20086	10.5765	14.2601	11.5304	11.0948	6.85357	7.93241	6.36374	8.22101	4	ZNF786
ENSG00000147118	8.09537	5.25597	10.0817	17.4985	24.798	17.9724	21.1532	13.0732	10.545	8.77979	7.60241	4	ZNF182
ENSG00000115816	31.8764	44.5245	54.9058	95.8533	111.729	127.591	117.46	84.7431	57.5213	59.9855	56.1434	4	CEBPZ
ENSG00000167635	40.0701	25.994	42.1154	102.598	101.428	110.695	109.507	88.3748	60.1061	47.9769	44.488	4	ZNF146
ENSG00000142528	3.98293	2.63914	2.55312	9.95923	12.0995	11.7325	12.0891	7.55086	5.67424	5.167	5.65824	4	ZNF473
ENSG00000204604	11.1694	6.74062	6.87597	14.317	39.6599	27.1336	18.6676	16.6359	15.3499	16.626	10.6163	4	ZNF468
ENSG00000118620	17.3137	15.1413	23.4629	42.9848	54.5727	45.1936	20.49	21.153	22.5244	22.4475	27.2222	4	ZNF430
ENSG00000197608	4.75254	3.57305	9.74971	17.2407	24.0454	21.1112	10.32	5.14258	8.94045	8.88028	2.9016	4	ZNF841
ENSG00000156127	10.8453	5.06027	10.7317	24.08	47.3985	44.2067	15.8468	6.59094	11.3192	8.0911	6.86969	4	BATF
ENSG00000164011	3.36696	1.81002	13.5804	14.2762	13.8555	12.9076	14.4195	10.8607	11.5201	8.08303	4.28786	4	ZNF691
ENSG00000167981	5.56207	4.17002	8.36835	11.8867	10.0812	10.1438	8.39853	6.15768	7.1826	6.93017	6.08174	4	ZNF597
ENSG00000010539	3.16721	5.71982	6.67525	16.7471	14.9862	18.5927	14.0447	9.54009	8.41035	9.43993	8.96283	4	ZNF200
ENSG00000181315	5.82896	15.4411	21.7381	28.1653	30.7729	31.8832	27.8009	19.9188	18.8288	14.7413	18.9099	4	ZNF322
ENSG00000164631	10.2127	15.9524	21.8966	30.0188	33.5736	33.8224	29.6081	18.9507	19.5182	16.7576	20.2227	4	ZNF12
ENSG00000110925	10.9648	14.0151	22.6036	29.584	37.1076	36.4739	30.3772	16.5237	19.8243	12.7049	17.2573	4	CSRNP2
ENSG00000196652	7.70683	10.8629	14.7688	15.4899	21.4477	20.2236	16.5148	12.5877	10.7633	10.074	8.94084	4	ZKSCAN5
ENSG00000125618	1.9973	2.96603	11.3055	20.7937	20.0661	23.4906	12.8199	5.95156	5.7995	4.60968	4.42258	4	PAX8
ENSG00000137309	66.1001	483.126	764.016	1012.22	1207.36	1185.81	766.499	530.203	375.007	221.339	251.317	4	HMGA1
ENSG00000198783	19.6541	29.8948	37.4857	47.4678	44.4963	47.8601	40.1467	27.2972	26.7359	22.8097	22.1426	4	ZNF830
ENSG00000126767	29.9311	30.6825	48.6511	85.4083	82.6251	84.7629	60.5551	52.985	52.1915	35.8411	36.8531	4	ELK1
ENSG00000131931	13.6952	11.8048	23.9373	43.3915	40.9369	39.7562	34.5152	30.0332	18.4592	16.338	14.6971	4	THAP1
ENSG00000215421	8.38711	8.62466	13.9294	21.8807	23.8004	18.3769	12.7451	12.5771	11.2799	10.2018	9.75799	4	ZNF407
ENSG00000170325	9.28753	9.97739	12.9924	15.4137	18.4636	17.1575	12.6047	11.6534	9.92113	8.9349	10.8222	4	PRDM10
ENSG00000215271	3.65961	1.87482	7.53272	19.9677	11.1147	7.90772	12.0982	10.9167	14.6017	13.0083	15.9765	3	HOMEZ
ENSG00000198040	2.60479	1.36346	5.835	14.3891	6.76871	7.64707	6.95916	7.10572	7.30088	9.72262	9.78652	3	ZNF84
ENSG00000124782	40.2859	37.8968	58.4508	72.8002	47.4572	44.2211	55.1745	54.0985	48.5675	44.4816	46.1567	3	RREB1
ENSG00000006704	0.0273686	1.78527	14.393	20.0806	17.5758	8.94769	7.11354	10.2282	14.4278	8.81137	10.0571	3	GTF2IRD1
ENSG00000169635	7.11823	4.15177	10.0828	10.1691	9.50704	5.78951	8.33178	7.99817	8.37467	6.77667	8.65045	3	HIC2
ENSG00000186812	12.7012	21.1869	19.5646	27.9292	22.9559	21.7003	31.6973	21.028	16.3528	18.896	18.3368	3	ZNF397
ENSG00000166478	24.3529	41.4809	54.8034	61.4297	54.2504	47.8196	44.4491	27.9591	19.9319	18.9246	15.8242	3	ZNF143
ENSG00000062194	74.6502	104.571	110.383	144.855	126.533	126.96	111.037	78.1493	53.3172	54.7821	50.9186	3	GPBP1
ENSG00000169016	14.2647	47.0588	56.1366	62.9364	62.254	59.6469	44.8196	30.8567	22.4366	24.2085	25.3845	3	E2F6
ENSG00000160633	71.3024	129.821	127.264	175.326	163.69	171.214	145.263	94.7012	82.9819	58.7546	73.7604	3	SAFB
ENSG00000169136	54.7731	106.813	123.217	138.276	149.269	172.221	197.578	86.2505	60.8694	62.9968	61.4665	3	ATF5
ENSG00000142556	3.02666	5.83864	8.52132	9.97754	10.2793	9.98439	8.8938	6.43564	4.01941	6.22715	3.98134	3	ZNF614
ENSG00000057657	16.3593	25.7687	24.619	43.3299	50.0312	53.6326	40.3766	21.1226	8.09187	16.2695	12.7554	3	PRDM1
ENSG00000196387	3.13569	2.62354	2.92947	10.1193	10.3232	6.69394	3.92868	6.53565	4.86034	4.36603	4.01332	3	ZNF140
ENSG00000172819	7.86366	22.1822	32.4571	69.3932	53.8977	26.9042	21.4688	15.7342	11.279	3.19907	1.45968	3	RARG
ENSG00000127124	11.2935	10.9785	15.757	32.4491	36.196	12.0662	9.92739	10.5423	11.5999	5.89823	3.78908	3	HIVEP3
ENSG00000162772	60.3311	628.97	698.273	1622.83	1734.87	1100.52	223.703	137.585	198.639	144.488	103.711	3	ATF3
ENSG00000140968	127.554	161.825	214.613	417.506	470.996	233.12	193.459	120.418	123.514	139.64	189.997	3	IRF8
ENSG00000157554	0.0919064	0.0558105	1.02084	7.90938	10.2417	1.65617	0.017834	0	0.009528	0	0	3	ERG
ENSG00000148516	1.49171	2.12084	28.4833	26.2921	23.9978	14.6948	0.993393	0.480805	0.635085	0.068607	0.076073	3	ZEB1
ENSG00000150347	6.31314	16.4664	40.903	39.6874	30.0521	21.9725	7.36723	9.60442	5.18995	13.684	7.67091	3	ARID5B
ENSG00000113580	56.0921	103.839	197.409	203.232	157.592	111.078	78.9751	75.8357	55.8954	64.2202	60.4193	3	NR3C1
ENSG00000186020	3.11325	5.47523	10.6528	10.8679	11.6112	8.3433	6.72175	6.00405	5.26484	6.45259	5.42659	3	ZNF529
ENSG00000171466	19.1196	28.6181	68.8943	73.8676	77.2233	69.6144	40.6559	36.6667	32.2254	33.7914	30.2337	3	ZNF562
ENSG00000138311	0.204731	2.43786	16.6758	16.9304	10.7211	10.6948	7.18891	4.6405	3.00665	2.05209	2.42227	3	ZNF365
ENSG00000104885	18.8925	86.1051	161.227	215.566	174.568	128.09	66.7651	51.1324	45.4154	37.9384	45.6142	3	DOT1L
ENSG00000175105	13.931	21.5207	41.3204	42.261	37.245	34.3691	22.9613	19.7407	17.0125	13.442	13.054	3	ZNF654
ENSG00000116731	42.5979	37.2962	48.5915	71.2198	51.9799	56.4637	33.1188	21.296	22.842	27.7532	11.071	3	PRDM2
ENSG00000160199	7.43721	31.2825	22.1672	51.5251	34.1019	24.0045	16.2928	9.04044	8.23253	10.1235	10.3109	3	PKNOX1
ENSG00000197063	24.6527	172.611	155.679	246.564	120.35	97.9245	39.7354	20.9688	26.7397	22.508	25.7071	3	MAFG
ENSG00000167395	12.823	48.5379	58.0408	69.1063	54.1732	42.3941	32.0792	19.86	24.9217	15.3531	19.3873	3	ZNF646
ENSG00000149948	0.0101886	0.880694	11.6496	20.3312	14.4697	5.90588	0.972556	0.23403	0.199667	0.025368	0.026646	3	HMGA2
ENSG00000172006	2.51815	1.5913	6.20716	10.7705	7.17641	4.4868	1.59081	1.68706	1.71768	1.64328	1.59555	3	ZNF554
ENSG00000107249	0.317744	2.73626	18.234	27.7058	6.72952	4.11598	2.25017	0.285953	0.215365	0.119486	0.098325	3	GLIS3
ENSG00000073861	3.57682	3.97914	27.9825	44.347	24.0316	6.6016	1.68507	0.674053	1.8751	0.287619	0.506982	3	TBX21
ENSG00000172379	0.0087648	1.23899	11.9569	15.2354	7.24329	3.67266	0.66365	0.009684	0.0139353	0	0	3	ARNT2
ENSG00000167034	0.242839	6.38251	21.2731	34.0259	14.6288	7.89247	1.15405	0.0751503	0.182888	0.04686	0	3	NKX3-1

## Sheet: Table S6
Supplementary Table S6：5 Clusters of 220 down-regulated differentially expressed TFs during the intermediate stage.
	mono	h0	h2	h4	h8	h12	d1	d2	d3	d4	d7	Cluster	gene name
ENSG00000075426	177.134	431.523	343.87	241.456	189.606	145.228	76.3966	32.4274	18.8286	19.2952	23.947	5	FOSL2
ENSG00000157557	128.281	662.359	481.846	329.73	300.398	295.914	109.468	44.4034	22.9766	36.1233	17.0194	5	ETS2
ENSG00000111145	56.4077	168.873	159.389	94.8751	81.0066	89.8446	29.1673	16.5766	8.94092	11.5853	8.40283	5	ELK3
ENSG00000164683	0.197418	18.0608	15.4484	8.24094	2.74265	0.960171	0.180775	0.107295	0.014466	0.0494205	0	5	HEY1
ENSG00000188290	0.885757	43.0037	22.3277	14.6411	6.47598	2.33332	0.220885	0.0237683	0.0308603	0	0	5	HES4
ENSG00000169155	15.3617	172.171	103.444	74.0095	51.4855	18.9497	20.7817	10.8997	5.80327	5.72648	9.33765	5	ZBTB43
ENSG00000131759	158.288	391.278	210.486	146.311	86.4065	73.6511	54.5919	55.9864	46.8584	28.7556	34.9745	5	RARA
ENSG00000184221	8.76773	34.0377	17.6181	14.1216	3.19326	4.52327	4.74035	0.425702	0.368296	1.47142	0.800505	5	OLIG1
ENSG00000153234	104.118	494.16	155.305	35.6274	13.6394	6.68701	1.67303	0.876961	0.313307	0.818907	0.439868	5	NR4A2
ENSG00000144655	218.047	709.93	292.755	126.184	85.6671	54.2942	23.0462	12.2731	7.68341	7.47209	6.01755	5	CSRNP1
ENSG00000114315	19.913	130.519	21.0342	14.637	10.1213	10.1011	0.990149	0.036056	0.0692497	0.0719075	0	5	HES1
ENSG00000124216	16.1103	346.952	110.299	60.9038	32.0923	15.4431	2.6069	0.479667	0.251065	0.163657	0.70174	5	SNAI1
ENSG00000179388	16.0852	404.653	82.6433	22.0495	5.92152	2.05574	0.596603	1.28655	0.658294	2.34897	0.054976	5	EGR3
ENSG00000123358	94.2905	1022.58	293.844	95.5126	29.0813	16.9281	3.70616	1.62349	2.78814	3.19753	1.10189	5	NR4A1
ENSG00000104856	34.5979	83.1073	36.6947	32.117	22.4247	33.519	42.5049	18.35	8.63118	12.0893	12.5357	5	RELB
ENSG00000077150	90.3721	228.246	144.569	116.465	85.5272	110.61	123.033	50.5437	24.313	32.2229	33.7906	5	NFKB2
ENSG00000175197	217.735	435.281	170.845	132.97	141.806	203.006	167.348	85.8812	67.3623	70.1941	68.5968	5	DDIT3
ENSG00000106546	178.131	239.148	143.425	95.2229	100.679	142.276	110.08	75.4479	40.8936	57.1381	45.1363	5	AHR
ENSG00000148737	22.5078	21.5929	14.3588	9.39019	6.34212	6.35373	9.36906	11.2082	7.71525	7.61253	5.26034	5	TCF7L2
ENSG00000168769	90.6618	101.576	52.0672	36.6377	36.1503	31.3227	33.78	31.9007	21.882	28.793	18.0146	5	TET2
ENSG00000137166	11.5963	9.20763	6.1091	6.54547	5.11843	5.6226	6.10144	4.70101	3.50112	2.74808	2.92709	5	FOXP4
ENSG00000198839	58.3303	56.7176	40.0575	29.1991	31.7819	38.7511	28.1956	27.1486	19.9121	23.3953	21.6042	5	ZNF277
ENSG00000151650	22.9756	19.448	10.4379	7.8221	3.27339	3.91863	4.08349	1.12123	0.598177	0.471612	0.639542	5	VENTX
ENSG00000160908	93.1545	69.5037	56.9549	47.2071	43.9192	39.8261	26.5964	22.8891	21.067	20.6975	19.934	5	ZNF394
ENSG00000166949	34.1374	42.1539	12.4795	10.7553	7.99916	8.62383	3.14006	1.5593	2.32136	9.64397	9.90327	5	SMAD3
ENSG00000120738	868.209	919.222	92.3425	41.1004	20.2537	10.6118	2.1253	11.0976	8.16251	44.1173	45.1564	5	EGR1
ENSG00000130522	131.152	145.006	39.9688	34.6045	30.8355	27.5206	41.1953	37.362	20.9729	17.775	41.7599	5	JUND
ENSG00000125812	43.2807	97.7443	14.122	8.30192	11.2283	16.89	16.75	13.1196	9.62859	13.8826	12.0317	5	GZF1
ENSG00000020633	77.7696	120.935	45.2841	41.4308	27.1769	17.7177	22.4636	19.4575	18.8642	21.8002	25.5906	5	RUNX3
ENSG00000125740	459.471	1000.41	194.574	47.4069	16.9698	6.625	1.09988	0.778737	0.510036	0.408452	0.564072	5	FOSB
ENSG00000165030	133.872	255.295	70.6438	32.0939	22.3562	26.0073	31.3865	25.3932	10.4281	18.0617	12.4885	5	NFIL3
ENSG00000166987	47.8301	47.3446	38.4728	32.5189	26.073	29.6489	23.4682	17.4626	17.2072	17.4856	21.6747	5	MBD6
ENSG00000165655	9.43049	10.8631	8.84157	4.9606	4.62615	3.91635	3.97245	3.08031	2.19669	2.4556	2.96479	5	ZNF503
ENSG00000059728	149.27	206.805	116.899	38.6002	26.7434	39.9086	45.4659	33.3079	22.3354	28.6956	33.4821	5	MXD1
ENSG00000100644	347.317	410.244	249.429	141.085	103.703	101.491	83.3747	81.8481	77.7035	159.404	129.903	5	HIF1A
ENSG00000116604	97.8899	142.717	82.032	69.9057	45.0689	32.4057	21.7668	18.6327	21.2523	23.2567	25.3925	5	MEF2D
ENSG00000162924	82.1166	102.728	85.5641	53.0782	37.1196	31.3673	23.8037	31.0798	32.7683	42.9418	39.9885	5	REL
ENSG00000126368	10.6792	13.9062	6.47637	6.26687	11.2459	16.1951	2.75745	3.33611	3.9255	5.01085	5.59977	4	NR1D1
ENSG00000125347	259.501	55.4956	94.8708	200.187	262.585	170.049	99.5451	46.5584	25.9165	18.8215	16.4947	4	IRF1
ENSG00000187605	77.4978	38.5008	12.7258	51.2149	69.3709	55.8778	36.6713	31.6431	26.3794	28.1005	26.6151	4	TET3
ENSG00000158805	38.0531	22.583	11.3938	16.2477	18.257	23.9403	12.9714	9.89218	7.66691	7.33767	7.7074	4	ZNF276
ENSG00000124813	15.0801	6.93408	4.65377	5.42662	11.9439	18.3656	5.13976	1.74564	0.922735	1.23811	0.648705	4	RUNX2
ENSG00000257315	27.316	11.0014	18.6047	31.3432	37.6483	29.0974	9.40224	13.5344	13.955	12.688	15.568	4	ZBED6
ENSG00000157554	0.0919064	0.0558105	1.02084	7.90938	10.2417	1.65617	0.017834	0	0.009528	0	0	4	ERG
ENSG00000148516	1.49171	2.12084	28.4833	26.2921	23.9978	14.6948	0.993393	0.480805	0.635085	0.068607	0.076073	4	ZEB1
ENSG00000167034	0.242839	6.38251	21.2731	34.0259	14.6288	7.89247	1.15405	0.0751503	0.182888	0.04686	0	4	NKX3-1
ENSG00000073861	3.57682	3.97914	27.9825	44.347	24.0316	6.6016	1.68507	0.674053	1.8751	0.287619	0.506982	4	TBX21
ENSG00000010818	7.88094	31.4542	50.5837	35.5215	34.5536	31.6166	9.24439	2.70863	3.94571	4.8758	4.95481	4	HIVEP2
ENSG00000152784	0.53705	4.06996	10.1639	9.26809	2.51793	1.39763	0.152806	0.0527047	0.0465527	0.185801	0.131072	4	PRDM8
ENSG00000138378	6.08207	11.5702	15.9563	11.9508	6.55626	4.47154	3.00287	2.10003	2.16885	5.46897	1.8459	4	STAT4
ENSG00000069667	11.4732	8.92933	13.4431	8.38242	7.63611	6.66852	1.87237	0.800831	0.238401	0.452329	0.175857	4	RORA
ENSG00000177606	479.219	342.283	388.487	516.788	476.252	387.719	178.185	164.155	137.621	112.237	164.599	4	JUN
ENSG00000134954	45.3142	22.2786	29.5699	31.0199	27.9415	22.9369	17.0137	7.32658	2.00269	3.22618	1.16105	4	ETS1
ENSG00000081059	14.7067	7.96513	9.01457	9.00389	12.2471	8.45173	5.0657	2.39439	1.44402	1.80142	2.62438	4	TCF7
ENSG00000155090	194.628	308.007	246.151	357.873	185.72	155.686	74.5738	43.0698	49.3132	78.8208	82.5262	4	KLF10
ENSG00000179361	21.662	28.1219	27.0039	29.824	30.3236	31.5913	11.1792	3.93338	4.54468	4.33028	2.81816	4	ARID3B
ENSG00000137265	12.4201	12.9144	17.413	18.2815	14.644	9.81586	6.01381	1.24144	0.337412	1.2095	0.290646	4	IRF4
ENSG00000185507	34.8441	41.9283	48.1824	52.3095	40.411	37.3492	38.2073	12.598	8.52633	4.18376	4.27847	4	IRF7
ENSG00000122085	35.4072	7.94332	7.86864	26.9961	26.9255	31.13	30.6257	27.9405	26.7516	28.6674	20.5122	2	MTERF4
ENSG00000267680	33.5127	4.70956	6.73448	20.0704	35.2664	39.6995	33.9599	25.1536	29.7108	27.871	30.4061	2	ZNF224
ENSG00000164916	24.3317	8.34784	4.2715	11.1046	18.517	23.4464	23.6681	22.0556	19.7868	16.4741	16.4206	2	FOXK1
ENSG00000170581	208.759	35.8749	19.9047	41.4112	119.131	162.098	144.781	121.35	113.084	107.734	120.34	2	STAT2
ENSG00000158773	165.483	40.5701	16.0249	47.101	107.642	121.631	100.876	111.013	103.165	69.7725	83.4135	2	USF1
ENSG00000184481	31.1288	10.7952	4.1942	5.74381	14.8775	20.4781	27.3667	14.3354	13.4484	13.6613	13.7883	2	FOXO4
ENSG00000185219	10.8602	2.40045	1.2728	2.29257	4.43701	7.38133	8.92631	8.53148	5.99999	6.44422	5.77128	2	ZNF445
ENSG00000197037	17.5947	4.07088	2.79185	6.74138	10.9627	14.3258	15.7473	11.1318	8.1697	10.6457	9.5725	2	ZSCAN25
ENSG00000166860	9.26392	0.748135	1.244	2.56882	4.57278	7.60808	10.3067	6.3187	4.98287	5.23667	4.67883	2	ZBTB39
ENSG00000168286	30.0064	3.64383	5.60874	9.79029	19.3932	27.4434	31.9036	21.56	16.2218	15.9572	16.779	2	THAP11
ENSG00000170265	12.5069	2.79119	2.05243	7.27506	11.4543	14.8132	17.413	13.8584	13.3812	10.0636	14.0068	2	ZNF282
ENSG00000167384	6.83823	1.17649	1.79302	3.79343	7.08009	9.26693	12.0198	8.38797	8.45979	7.87944	9.07146	2	ZNF180
ENSG00000186448	8.76807	2.17986	2.04074	5.31414	11.7912	15.4334	18.7145	14.4634	11.8348	12.0887	13.34	2	ZNF197
ENSG00000141905	21.4296	7.70666	4.72468	6.81902	14.6519	23.9715	36.8384	24.2285	19.3017	26.0514	24.9944	2	NFIC
ENSG00000249709	8.73277	1.06338	1.60607	4.02297	6.99372	9.91355	14.6096	13.7644	8.7266	12.2836	11.751	2	ZNF564
ENSG00000085644	7.21485	1.63032	2.05527	3.48789	6.69705	7.53995	10.7912	9.83125	6.58011	5.24974	6.32037	2	ZNF213
ENSG00000128604	107.988	25.9523	16.0153	44.3218	86.936	91.7343	139.954	115.445	100.648	81.1137	87.969	2	IRF5
ENSG00000126464	12.486	2.11576	1.41208	1.95246	4.74936	9.86889	14.3195	11.9537	8.11959	6.51506	8.80156	2	PRR12
ENSG00000132024	22.107	7.61057	1.35051	5.87365	12.1816	21.6987	27.9853	24.8828	21.6006	15.173	17.2259	2	CC2D1A
ENSG00000169957	8.15107	1.31217	1.13391	4.15169	6.36124	17.1922	37.0895	24.773	16.9436	14.4498	16.132	2	ZNF768
ENSG00000169955	6.77588	1.29447	0.426718	3.15352	3.33473	5.10449	10.9975	9.3953	7.01749	6.10422	5.72179	2	ZNF747
ENSG00000141510	39.9398	13.4785	7.02556	10.2449	20.5143	44.4151	72.1866	56.5493	53.6754	48.1408	29.4463	2	TP53
ENSG00000177873	6.25494	1.66038	0.84312	1.79376	5.41092	6.82566	12.3572	8.65633	8.56025	6.3396	5.68875	2	ZNF619
ENSG00000187626	3.99503	0.745781	1.1057	2.95247	6.31678	10.0823	8.85767	5.30762	6.3714	5.35707	6.04552	2	ZKSCAN4
ENSG00000128000	6.44682	1.31909	1.86997	4.65631	9.87069	12.0781	13.6453	9.00981	8.36142	8.16736	7.34805	2	ZNF780B
ENSG00000171163	15.8352	2.2645	0.859846	6.95079	20.9123	26.1213	23.0327	14.7015	12.0118	8.66011	12.3171	2	ZNF692
ENSG00000197782	16.1976	4.84537	2.74351	7.29313	19.84	26.4189	27.1798	17.4875	17.3891	11.2689	12.4195	2	ZNF780A
ENSG00000125945	5.78311	1.16072	2.83143	5.5908	8.6231	15.1427	13.3917	6.84428	6.99358	6.54211	6.73261	2	ZNF436
ENSG00000139651	23.6114	5.1738	6.42964	17.7094	26.9091	34.9702	31.0258	20.1752	18.6927	19.034	18.0754	2	ZNF740
ENSG00000214022	33.7981	10.8504	3.97231	10.3826	16.8272	50.032	57.7215	35.4689	27.0691	20.974	35.1261	2	REPIN1
ENSG00000188321	9.27562	1.58271	3.81344	6.53785	12.882	21.7042	29.7707	13.8085	10.3958	12.2094	8.09573	2	ZNF559
ENSG00000088876	2.97384	0.262039	0.394566	0.537452	5.57446	7.42005	10.6778	5.82402	5.72087	3.93027	4.11109	2	ZNF343
ENSG00000204644	2.34457	0.359868	1.19109	8.47842	11.4081	10.8115	9.38848	11.3565	11.7642	6.58028	8.38614	2	ZFP57
ENSG00000197024	8.96499	1.63754	5.09313	12.1292	15.5074	13.8309	11.8184	10.2649	12.7355	8.24204	7.2983	2	ZNF398
ENSG00000189180	13.5023	8.44915	6.52723	7.58034	12.817	15.6374	15.0862	6.35527	7.18303	5.27382	7.82949	2	ZNF33A
ENSG00000175213	9.54896	1.71066	5.23273	9.35077	11.2062	16.4866	13.0293	8.81062	7.68737	5.76306	5.4547	2	ZNF408
ENSG00000143190	10.2203	4.76787	2.30693	8.71713	18.8425	21.2701	16.3069	9.13185	11.3919	11.7722	11.1897	2	POU2F1
ENSG00000104221	7.96313	1.76974	3.6977	9.06613	27.9222	31.0801	13.4441	9.55286	10.2168	9.43218	8.01373	2	BRF2
ENSG00000135148	78.7928	14.3748	20.9412	49.671	122.303	130.82	84.2306	70.9217	54.0838	53.0366	42.7756	2	TRAFD1
ENSG00000174652	21.4474	11.9849	9.76878	13.6795	12.7365	11.2153	9.61478	11.1387	10.44	11.3185	13.8115	1	ZNF266
ENSG00000121297	18.5831	2.86229	4.02474	5.07844	3.68864	4.41134	8.37017	5.93571	3.8498	4.80088	4.36314	1	TSHZ3
ENSG00000204304	176.25	45.387	20.9597	26.2537	30.7637	35.2179	61.9217	46.0331	28.3161	39.491	37.6664	1	PBX2
ENSG00000050344	21.2374	7.20406	4.79415	4.74593	2.86591	4.70802	9.11451	5.42402	3.12759	3.84918	3.65374	1	NFE2L3
ENSG00000081189	106.222	36.5651	9.06641	6.99133	2.98742	6.36088	4.69008	6.42001	8.90845	18.1073	10.1274	1	MEF2C
ENSG00000118263	61.2046	27.5923	7.56141	8.10068	5.77777	5.65298	7.47979	14.1894	11.038	17.0174	11.9311	1	KLF7
ENSG00000181444	76.1863	28.1149	7.62612	3.32006	0.639208	0.541623	6.37683	8.60265	4.2827	3.47182	5.82308	1	ZNF467
ENSG00000135365	62.0299	21.2817	3.88943	2.91626	2.514	6.29579	13.4039	10.0309	7.97913	9.94285	10.188	1	PHF21A
ENSG00000123933	44.5427	11.3078	3.57992	4.40905	3.71651	4.42384	5.27651	5.6055	4.46158	8.66182	12.0396	1	MXD4
ENSG00000150907	30.0039	12.9641	7.03764	4.81486	3.26488	3.61808	4.95235	8.25757	7.28905	9.13399	10.1525	1	FOXO1
ENSG00000127528	101.654	31.9766	19.5406	12.2316	7.67367	3.55573	3.38492	8.80182	3.72229	1.91814	2.12604	1	KLF2
ENSG00000028277	184.897	55.2414	22.2498	26.7248	17.2847	19.4465	12.5047	4.90326	4.2719	14.9613	10.2479	1	POU2F2
ENSG00000123405	52.0941	12.6619	3.2225	1.79069	0.645562	0.501154	0.42654	0.451827	0.195928	0.0757485	0	1	NFE2
ENSG00000174428	10.5522	4.58965	2.49019	2.05099	1.67569	2.90768	2.55762	1.16881	1.15066	1.57338	0.974749	1	GTF2IRD2B
ENSG00000179456	48.4121	17.0827	15.8437	9.1495	8.7898	12.0153	12.2164	7.2498	5.33844	8.17673	7.9771	1	ZBTB18
ENSG00000106948	127.763	51.2232	21.1781	18.7392	33.2431	38.5622	39.4413	40.0088	38.1483	31.2318	23.0062	1	AKNA
ENSG00000109381	35.9857	15.7282	10.1126	7.49231	11.9414	13.7174	13.8977	13.1589	10.9523	12.5943	10.5444	1	ELF2
ENSG00000170345	4514.6	372.448	57.765	34.4172	37.916	37.7739	81.3203	139.469	73.7149	165.263	243.262	1	FOS
ENSG00000116990	57.5236	14.164	2.91383	4.33189	4.90779	7.46537	7.06105	6.39214	3.83686	5.00669	5.25125	1	MYCL
ENSG00000169926	263.644	99.489	62.1873	78.9175	77.7985	82.1163	90.2682	81.2534	64.0528	75.4125	72.2122	1	KLF13
ENSG00000188994	24.2503	11.0064	4.26828	10.1853	13.7462	15.6383	14.2654	14.2877	9.92213	12.6728	11.8486	1	ZNF292
ENSG00000198455	11.4305	2.51593	2.00234	3.59143	4.13331	7.09831	5.67957	5.15291	4.96673	5.72162	5.74444	1	ZXDB
ENSG00000137871	31.2416	8.37419	2.8128	2.93854	7.42035	12.7739	14.1361	15.6177	10.6736	14.4702	11.7147	1	ZNF280D
ENSG00000180357	43.961	12.6753	5.03557	12.9046	14.2473	17.2922	20.7864	20.6167	19.6781	16.6881	18.3537	1	ZNF609
ENSG00000163516	40.2753	4.10982	2.34747	4.29138	8.29085	14.6035	20.079	14.123	11.4743	12.744	12.8534	1	ANKZF1
ENSG00000102901	47.6584	13.5195	3.1812	6.16122	12.6842	18.399	24.0845	16.5903	14.9649	15.9263	19.2443	1	CENPT
ENSG00000198945	28.1427	13.9707	5.79382	5.46188	5.85512	15.6845	16.8217	7.528	5.13132	7.1245	6.28787	1	L3MBTL3
ENSG00000123636	92.9837	56.8183	21.4036	30.9863	46.5987	57.3278	54.5628	39.4511	33.7413	35.4817	36.8897	1	BAZ2B
ENSG00000213347	10.9312	3.29803	1.59215	1.2691	2.8323	3.96293	5.0263	3.3722	2.00703	1.95446	2.71082	1	MXD3
ENSG00000076108	104.475	40.7594	18.5341	34.307	47.5176	55.4275	59.1362	51.3134	46.1054	28.7761	41.1267	1	BAZ2A
ENSG00000126003	55.0307	12.7633	7.00648	16.6679	23.9318	30.399	23.5226	16.2018	13.9341	12.1524	13.3615	1	PLAGL2
ENSG00000175727	78.1598	23.2186	15.8922	23.5721	28.7671	29.5778	27.8093	21.1696	23.7524	22.166	25.7485	1	MLXIP
ENSG00000135899	108.865	35.6647	18.4583	20.4085	43.1695	47.1701	35.4491	28.5188	28.1961	37.3251	27.5743	1	SP110
ENSG00000140836	26.6112	20.9488	17.1961	5.43582	9.25851	10.73	7.99836	9.31505	7.9993	13.2031	14.3326	1	ZFHX3
ENSG00000183779	41.1722	23.2825	7.53	5.03695	4.81247	4.09803	3.4043	5.14832	7.53616	13.2376	22.7484	1	ZNF703
ENSG00000257923	91.7179	68.05	34.1486	19.7444	14.9056	18.849	25.9806	31.2287	37.7961	41.4893	45.2519	1	CUX1
ENSG00000101493	49.6188	25.9919	33.5704	20.1406	14.7034	18.8508	23.0636	17.1279	13.6401	16.8692	19.8098	1	ZNF516
ENSG00000067082	845.475	636.523	338.308	263.244	222.542	202.816	116.778	152.452	114.517	242.122	242.481	1	KLF6
ENSG00000153814	52.6872	27.7708	20.6251	16.6779	15.183	13.7546	5.40138	10.4365	9.27248	9.18555	9.10895	1	JAZF1
ENSG00000182568	40.2629	25.4592	18.7462	12.7724	11.2676	13.7684	11.9062	14.2428	11.8084	14.3116	11.4506	1	SATB1
ENSG00000146592	84.1941	41.4432	8.83448	4.2878	3.14626	4.70561	5.47859	2.82094	2.1032	4.08051	1.81531	1	CREB5
ENSG00000136826	517.516	305.994	82.3163	30.2947	13.1899	10.5003	11.1073	22.0624	8.70247	13.7528	11.1326	1	KLF4
ENSG00000114861	62.7685	41.3604	21.7729	18.3789	13.6629	15.1631	11.2237	17.7378	13.0237	17.1043	14.2706	1	FOXP1
ENSG00000104447	39.8572	19.667	19.3996	8.74344	6.9083	8.00797	7.1863	10.459	7.55238	13.7789	10.8883	1	TRPS1
ENSG00000109787	136.394	72.7594	49.4621	40.2918	41.4481	43.7298	24.0682	26.6173	28.3976	61.4199	47.2476	1	KLF3
ENSG00000118495	33.4694	22.4242	13.1962	15.7145	10.8596	11.0578	16.0096	12.074	18.2677	14.2332	12.7244	1	PLAGL1
ENSG00000205189	17.2868	10.0676	5.89667	3.70302	4.28705	6.83039	7.22575	7.04316	4.22473	6.06912	5.01399	1	ZBTB10
ENSG00000171223	1031.22	701.485	233.615	92.6223	74.6986	115.317	177.389	154.471	108.191	96.6145	180.088	1	JUNB
ENSG00000171425	33.9582	25.9082	11.0742	7.50275	11.0422	11.4315	13.1037	8.25295	8.6359	8.91961	12.8111	1	ZNF581
ENSG00000143390	92.4473	61.5014	14.9991	10.7013	19.7562	23.611	41.4553	42.0373	28.252	48.9749	26.8465	1	RFX5
ENSG00000140396	49.298	38.4211	8.77925	10.6662	14.1651	22.1384	21.5256	22.2429	19.5507	25.1584	25.4453	1	NCOA2
ENSG00000104903	34.6348	25.5881	8.18838	6.94532	11.1051	19.3641	28.4221	20.4785	15.978	15.5021	17.6393	1	LYL1
ENSG00000116017	28.815	32.0619	7.84777	4.24036	5.69082	9.82606	19.4086	17.0348	10.9169	11.5143	15.1815	1	ARID3A
ENSG00000186918	42.1869	15.8852	10.4842	5.50064	5.98683	4.40243	6.55639	13.9486	14.969	30.4564	26.8924	1	ZNF395
ENSG00000196628	12.8329	5.94479	2.68817	1.48573	1.49371	0.783659	2.59681	3.50594	2.49078	7.87166	4.31256	1	TCF4
ENSG00000166432	10.9695	4.61914	3.68701	2.2762	1.96591	1.50478	2.75215	4.16309	3.84583	5.41879	4.3485	1	ZMAT1
ENSG00000141258	29.1098	15.5712	7.73229	8.08295	4.82515	4.9104	7.99587	10.123	11.5853	14.8555	13.8681	1	SGSM2
ENSG00000125520	15.4717	8.71517	3.23942	3.2894	3.54566	2.77265	6.27527	7.02943	5.28209	9.03701	13.3418	1	SLC2A4RG
ENSG00000118418	109.083	68.2733	39.3743	14.9838	7.78731	17.8424	48.8374	59.6495	53.4151	69.3132	68.4906	1	HMGN3
ENSG00000053254	96.6743	52.3745	30.4559	17.4984	18.0703	23.7858	47.1346	47.1312	35.2846	49.819	53.4153	1	FOXN3
ENSG00000140548	64.588	37.9918	22.0471	21.2587	20.7485	25.596	39.4303	30.9438	29.8579	32.8078	35.2963	1	ZNF710
ENSG00000237765	24.6951	11.885	7.06878	4.7493	3.53503	6.4842	13.0201	13.8187	10.3678	8.09754	9.08861	1	FAM200B
ENSG00000059122	24.7982	13.552	3.71055	2.00967	3.55161	8.0697	14.8467	11.434	11.9362	9.04385	12.4212	1	FLYWCH1
ENSG00000140044	73.6046	30.7479	10.015	2.71383	9.7694	13.921	34.0273	37.9032	34.0188	37.2391	31.0681	1	JDP2
ENSG00000139083	81.7771	43.6446	24.3749	16.5462	19.0488	33.7541	51.9251	56.5043	44.4644	46.1498	42.5506	1	ETV6
ENSG00000221869	45.6007	7.02103	0.92496	0.939307	2.18213	2.47111	5.44048	15.2281	6.56769	12.2366	21.3902	1	CEBPD
ENSG00000181827	16.6288	5.99157	5.12772	5.89284	4.39525	5.66889	6.81978	7.75595	6.24625	8.03342	9.2898	1	RFX7
ENSG00000105516	12.6264	2.84222	0.82061	0.369662	0.604895	1.28552	3.2704	3.55891	1.993	4.88333	7.18904	1	DBP
ENSG00000173757	93.1082	43.1289	26.1254	23.5351	25.6242	33.4962	36.8803	39.9352	40.6602	51.9001	54.5236	1	STAT5B
ENSG00000151702	177.418	54.0402	10.9877	6.79042	13.3154	23.8128	32.7467	59.8075	61.0178	68.1075	58.2152	1	FLI1
ENSG00000198740	30.2543	7.54658	3.28934	2.23328	2.33489	4.4992	6.35739	9.86222	6.86282	8.91158	6.72536	1	ZNF652
ENSG00000152804	70.3695	6.6654	3.01525	2.13297	6.81714	10.5778	14.0798	12.7351	12.3066	17.1368	13.1505	1	HHEX
ENSG00000118058	43.0715	12.0791	7.37763	10.6418	9.32948	12.3965	16.7504	15.6384	13.1322	14.6189	14.2853	1	KMT2A
ENSG00000074657	12.3133	4.71144	2.52554	2.57138	4.45495	5.30503	4.53915	4.74555	4.84592	6.08107	5.3009	1	ZNF532
ENSG00000172059	100.746	26.3655	12.7879	13.6093	18.0736	28.6743	21.9527	27.2651	18.2895	38.2986	36.1043	1	KLF11
ENSG00000196705	17.55	5.79133	4.57603	6.45565	8.57148	6.77298	7.08686	7.96038	10.1986	9.06212	12.3079	3	ZNF431
ENSG00000124766	16.1874	3.40142	2.87538	1.04889	1.44215	3.39626	4.56388	7.30497	6.9277	6.62358	13.2106	3	SOX4
ENSG00000133250	14.0632	2.94824	2.70497	2.86691	2.43705	3.32248	4.46415	7.32093	5.30811	5.46205	10.193	3	ZNF414
ENSG00000112561	58.0817	20.3526	5.90876	8.3612	13.6736	19.0317	25.5449	27.5984	38.371	43.4617	59.4658	3	TFEB
ENSG00000120798	16.2699	5.63637	3.04266	4.68503	6.19111	6.41682	8.98168	9.89623	9.95328	14.1367	14.581	3	NR2C1
ENSG00000126561	89.4461	46.3751	21.2625	19.269	28.8676	38.4703	44.3368	42.4847	59.4327	54.8642	74.2813	3	STAT5A
ENSG00000124496	27.26	10.3455	1.56799	3.62347	4.74418	5.85159	12.0422	15.3369	13.8966	15.1338	16.2652	3	TRERF1
ENSG00000148411	40.2499	10.4745	1.45531	1.87	2.14523	4.66944	7.38415	19.2232	20.6972	22.3454	27.4648	3	NACC2
ENSG00000160007	25.953	4.26148	5.83894	10.7951	10.2074	16.4163	22.7473	18.9414	17.6615	21.3058	24.141	3	ARHGAP35
ENSG00000121864	37.7271	4.06805	3.33914	7.89214	10.0304	17.9197	28.3525	32.7641	24.6891	30.5954	31.0546	3	ZNF639
ENSG00000099326	12.4745	5.54174	2.27437	5.03558	6.96948	8.58263	9.42714	8.95554	8.50968	10.1824	11.1931	3	MZF1
ENSG00000072736	53.2636	18.6994	8.51025	15.086	30.5603	39.1338	50.4868	46.1379	46.7284	55.3764	64.1813	3	NFATC3
ENSG00000140382	27.988	8.94867	4.37034	6.74083	14.8518	21.8482	25.7161	26.2074	21.8995	28.1976	27.4414	3	HMG20A
ENSG00000171295	15.8441	2.84663	2.0693	5.97526	8.89583	7.66223	12.1859	10.9011	11.7003	8.98	13.1795	3	ZNF440
ENSG00000196757	29.0174	9.79479	4.33002	5.22012	8.28727	12.4704	15.3966	17.7154	16.25	17.2317	19.1025	3	ZNF700
ENSG00000186376	11.7076	2.90949	1.20445	1.47808	3.83054	5.67903	7.49912	8.2602	6.49931	8.45678	8.10816	3	ZNF75D
ENSG00000166188	12.7312	2.10978	2.57719	2.79549	3.21903	5.12718	7.98402	8.41102	7.93758	5.90895	7.62643	3	ZNF319
ENSG00000100105	20.7775	4.04665	2.55763	3.75404	8.05384	10.3791	12.7421	12.1193	10.4462	10.5824	10.181	3	PATZ1
ENSG00000065970	41.3279	10.0898	6.01507	5.7058	10.754	19.9822	27.5153	22.0128	20.9987	18.6897	24.1167	3	FOXJ2
ENSG00000160685	140.295	28.3158	5.86835	7.87288	16.4941	34.1989	124.201	86.3235	64.2137	44.1733	53.3399	3	ZBTB7B
ENSG00000139793	25.5399	19.0834	3.86608	3.07755	7.56832	18.5725	30.5529	29.3282	22.8303	22.7098	17.1695	3	MBNL2
ENSG00000198081	25.9065	5.25744	2.44287	2.28226	4.82304	11.796	21.847	21.1965	16.7306	24.4756	14.8349	3	ZBTB14
ENSG00000151500	24.6746	6.36222	1.61939	3.21925	8.49185	12.7515	26.4908	23.5295	16.6963	18.7167	14.0433	3	THYN1
ENSG00000136936	23.643	11.8437	4.35425	3.5216	4.88685	8.666	18.5476	18.9403	12.9735	17.3245	17.9465	3	XPA
ENSG00000213676	114.347	62.379	27.4198	30.4003	39.9417	55.0957	96.9537	73.6658	81.8209	87.5612	65.161	3	ATF6B
ENSG00000119950	34.528	31.3416	8.21194	4.20639	5.6142	10.8839	22.8252	27.6262	22.894	35.3799	23.3658	3	MXI1
ENSG00000160094	26.866	5.21998	0.889613	0.85328	0.983342	3.97019	11.0656	20.0687	21.1986	16.8491	23.4246	3	ZNF362
ENSG00000185811	106.622	20.4571	11.2518	9.52505	15.1266	36.2306	49.5782	71.3468	79.2748	77.5767	64.2644	3	IKZF1
ENSG00000114853	10.4374	3.13753	0.879965	1.50635	2.75611	4.08129	6.10535	8.11865	7.30708	7.60599	8.10234	3	ZBTB47
ENSG00000154957	11.1228	3.94958	1.47863	2.89425	3.10861	5.26298	9.47682	10.797	11.6745	11.6716	9.55554	3	ZNF18
ENSG00000131116	12.778	5.32598	2.59656	2.49933	3.80184	5.08199	11.9696	17.0814	14.6291	11.7979	12.3301	3	ZNF428
ENSG00000119866	6.56384	4.81764	4.33986	2.37944	0.576539	0.661682	1.13061	1.91362	3.43517	5.10171	10.2023	3	BCL11A
ENSG00000161642	171.838	168.686	97.3776	53.7411	48.0983	64.604	80.5342	129.115	117.123	116.434	240.788	3	ZNF385A
ENSG00000184939	11.9199	2.88773	1.9275	2.10783	3.46677	4.72191	13.1912	11.0361	6.92354	10.3384	13.2738	3	ZFP90
ENSG00000169689	21.2664	10.5927	5.6211	2.82792	8.09496	10.7429	26.7088	18.334	22.5095	16.1393	22.0589	3	CENPX
ENSG00000111269	58.9989	25.5617	10.7632	8.98337	20.5537	39.7938	75.8944	77.2554	69.8306	111.365	107.574	3	CREBL2
ENSG00000130816	39.5936	12.9197	7.06559	9.96405	14.0217	29.6068	80.6887	81.8776	56.7344	65.3365	56.2298	3	DNMT1
ENSG00000122034	96.658	47.4652	18.6948	23.8429	46.2313	69.4554	147.497	154.062	139.759	133.189	134.241	3	GTF3A
ENSG00000020256	6.30353	1.41867	0.394697	0.449083	2.27398	4.99921	7.38412	10.4546	9.92202	8.632	9.81762	3	ZFP64
ENSG00000196453	7.00718	0.982379	1.29795	2.39087	3.58242	5.97202	9.21688	10.0593	8.57355	7.74205	10.1597	3	ZNF777
ENSG00000165804	3.85421	2.58808	1.84466	1.46372	0.774559	2.27847	14.9733	19.4657	15.008	13.4212	28.2224	3	ZNF219
ENSG00000025434	6.24644	2.29198	0.844578	1.26853	3.68283	5.13102	19.9433	62.0018	180.871	184.396	306.846	3	NR1H3
ENSG00000154655	2.34141	0.926205	0.665376	0.462423	1.21579	2.55104	2.82792	3.0781	5.40351	7.48564	10.0481	3	L3MBTL4
ENSG00000164048	24.6029	7.91535	3.74966	4.13382	9.96326	17.5493	22.6763	20.6929	45.9348	37.1458	59.3329	3	ZNF589
ENSG00000132846	6.03865	2.70965	1.78249	1.36122	2.8429	3.8766	6.12364	12.0333	15.6851	15.5543	17.996	3	ZBED3
ENSG00000196605	8.61783	2.06331	3.75966	5.42249	2.94299	4.26839	3.83353	7.56817	7.62125	10.5022	9.71187	3	ZNF846
ENSG00000170365	7.37487	1.76689	1.69512	1.24381	1.38845	1.48505	9.28516	20.1053	14.8374	14.0418	14.7644	3	SMAD1
ENSG00000186951	10.1495	3.55253	3.65523	4.38184	3.02087	3.41362	12.3414	15.7247	25.1926	17.2424	15.5943	3	PPARA

## Sheet: Table S7
Supplementary Table S7：Comparison of expression levels of AP-1 in purified monocytes and differentiated macrophages between our data and those obtained previously.
Our data													Previous data obtained with primary cells
	mono	h0	h2	h4	h8	h12	d1	d2	d3	d4	d7			mono_1	mono_2	macro_1	macro_2
c-Fos	4514.6	372.448	57.765	34.4172	37.916	37.7739	81.3203	139.469	73.7149	165.263	243.262		c-Fos	2814.59	110.293	9.28576	18.0358
FosB	459.471	1000.41	194.574	47.4069	16.9698	6.625	1.09988	0.778737	0.510036	0.408452	0.564072		FosB	518.817	6.0147	0.201094	0.083135
FosL1	14.8341	183.512	115.909	106.657	96.0867	79.4046	25.0351	11.9696	9.73506	7.99766	5.18491		FosL1	49.0044	14.1829	7.76941	7.6944
FosL2	177.134	431.523	343.87	241.456	189.606	145.228	76.3966	32.4274	18.8286	19.2952	23.947		FosL2	90.0658	92.6261	12.9246	17.6172
c-Jun	479.219	342.283	388.487	516.788	476.252	387.719	178.185	164.155	137.621	112.237	164.599		c-Jun	2100.99	292.793	260.012	255.97
JunB	1031.22	701.485	233.615	92.6223	74.6986	115.317	177.389	154.471	108.191	96.6145	180.088		JunB	6674.02	388.212	319.295	274.938
JunD	131.152	145.006	39.9688	34.6045	30.8355	27.5206	41.1953	37.362	20.9729	17.775	41.7599		JunD	3986.88	278.943	163.693	190.244
ATF7	29.0353	15.4589	14.8109	19.7709	25.1964	30.2182	33.1674	20.2562	21.959	24.6839	22.7546		ATF7	12.8841	19.2726	15.1607	12.9213
ATF2	34.1137	25.9412	29.3106	53.3152	66.1131	62.2804	53.3146	48.4183	38.7927	46.7736	51.6812		ATF2	6.25725	38.4916	14.4269	24.1893
ATF3	60.3311	628.97	698.273	1622.83	1734.87	1100.52	223.703	137.585	198.639	144.488	103.711		ATF3	60.4018	102.743	159.256	233.421
MAFB	293.945	480.768	148.961	155.043	157.126	186.058	168.683	171.118	122.121	235.347	180.934		MAFB	508.319	538.524	67.1988	48.842
ATF4	524.703	1466.65	1074.25	991.373	853.965	882.487	509.935	411.137	287.526	412.252	257.973		ATF4	460.962	301.352	199.36	180.842
ATF5	54.7731	106.813	123.217	138.276	149.269	172.221	197.578	86.2505	60.8694	62.9968	61.4665		ATF5	75.3674	289.723	60.4844	49.4139
ATF6B	114.347	62.379	27.4198	30.4003	39.9417	55.0957	96.9537	73.6658	81.8209	87.5612	65.161		ATF6B	145.609	113.085	75.9243	77.6802
BATF	10.8453	5.06027	10.7317	24.08	47.3985	44.2067	15.8468	6.59094	11.3192	8.0911	6.86969		BATF	22.0749	54.3106	6.55402	8.6213
BATF2	1.41005	0.113885	0.553396	1.16666	5.46123	3.84582	4.88429	4.28841	2.74618	2.34837	2.3435		BATF2	2.07208	4.34428	2.47832	2.38506
BATF3	8.3184	2.07389	0.969272	1.5728	3.68969	8.96914	8.51532	5.18221	5.82014	4.86872	3.28373		BATF3	19.7143	4.37094	2.41795	5.04404
JDP2	73.6046	30.7479	10.015	2.71383	9.7694	13.921	34.0273	37.9032	34.0188	37.2391	31.0681		JDP2	178.511	48.1616	21.1074	20.2777
c-MAF	4.36851	9.55755	10.763	14.594	11.5775	6.79487	8.57138	29.122	33.7143	62.646	45.6231		c-MAF	5.90801	12.9635	41.6709	40.6779
MAFF	27.0847	303.428	410.973	242.824	201.332	136.327	77.1436	101.921	128.942	67.3323	146.098		MAFF	123.195	34.4411	32.2976	117.761
MAFG	24.6527	172.611	155.679	246.564	120.35	97.9245	39.7354	20.9688	26.7397	22.508	25.7071		MAFG	38.758	139.439	30.9542	30.7676
MAFK	25.3418	176.543	150.133	148.684	126.911	114.072	50.461	30.1901	36.9496	29.7315	39.8745		MAFK	63.5284	44.4472	28.4142	30.6091
Nrl	1.50279	3.89474	3.34981	3.89006	3.215	1.65612	1.39493	2.19633	1.94371	1.30866	1.12718		Nrl	1.22405	3.83245	0.694174	1.72418

## Sheet: Table S8
Supplementary Table S8: TF binding motifs and their enrichment p values in the promoter regions of TFs in group 1.
Rank	TF	TF motif	P value
1	ATF7		1e-3
2	ATF1		1e-2
3	NPAS4		1e-2
4	SRF		1e-2
5	NFIL3		1e-2
6	JUND		1e-2
7	Sox17		1e-2
8	JUN		1e-2
9	Sox6		1e-2
10	Atf2		1e-2

## Sheet: Table S9
Supplementary Table S9: Primer pairs used for qRT-PCR experiments.
Genes	Forward Primer	Reverse Primer
DLX2	5’-ACACCTCCTACGCTCCCTATG	5’-TCACTATCCGAATTTCAGGCTCA
HIC1	5'-CGACGACTACAAGAGCAGCAGC	5’-CAGGTTGTCACCGAAGCTCTC
OLIG2	5’-ATAGATCGACGCGACACCAG	5’-ACCCGAAAATCTGGATGCGA
EGR4	5’-GGAGGCTCGTTTTCCCGTAAT	5’-TGGGATAGAGTCTGTTGGCTG
ACTB	5’-ATTGCCGACAGGATGGAGAA	5’-GCTGATCCACATCTGCTGGAA
